# Supplementary material for: The draft genome of blunt snout bream (Megalobrama amblycephala) reveals the development of intermuscular bone and adaptation to herbivorous diet
Source: PubMed Central journal article supplement (PMC5570040; doi:10.1093/gigascience/gix039), 2017-05-23

## The draft genome of *Megalobrama amblycephala* reveals the development of intermuscular bone and adaptation to herbivorous diet

--Manuscript Draft--

|                                                      |                                                                                                                                                                                                                                                                                                                                                                                                                                                                                                                                                                                                                                                                                                                                                                                                                                                                                                                                                                                                                                                                                                                                                                                                                                                                                                                                                                                                                                                    |
|------------------------------------------------------|----------------------------------------------------------------------------------------------------------------------------------------------------------------------------------------------------------------------------------------------------------------------------------------------------------------------------------------------------------------------------------------------------------------------------------------------------------------------------------------------------------------------------------------------------------------------------------------------------------------------------------------------------------------------------------------------------------------------------------------------------------------------------------------------------------------------------------------------------------------------------------------------------------------------------------------------------------------------------------------------------------------------------------------------------------------------------------------------------------------------------------------------------------------------------------------------------------------------------------------------------------------------------------------------------------------------------------------------------------------------------------------------------------------------------------------------------|
| <b>Manuscript Number:</b>                            | GIGA-D-16-00088R2                                                                                                                                                                                                                                                                                                                                                                                                                                                                                                                                                                                                                                                                                                                                                                                                                                                                                                                                                                                                                                                                                                                                                                                                                                                                                                                                                                                                                                  |
| <b>Full Title:</b>                                   | The draft genome of <i>Megalobrama amblycephala</i> reveals the development of intermuscular bone and adaptation to herbivorous diet                                                                                                                                                                                                                                                                                                                                                                                                                                                                                                                                                                                                                                                                                                                                                                                                                                                                                                                                                                                                                                                                                                                                                                                                                                                                                                               |
| <b>Article Type:</b>                                 | Research                                                                                                                                                                                                                                                                                                                                                                                                                                                                                                                                                                                                                                                                                                                                                                                                                                                                                                                                                                                                                                                                                                                                                                                                                                                                                                                                                                                                                                           |
| <b>Funding Information:</b>                          |                                                                                                                                                                                                                                                                                                                                                                                                                                                                                                                                                                                                                                                                                                                                                                                                                                                                                                                                                                                                                                                                                                                                                                                                                                                                                                                                                                                                                                                    |
| <b>Abstract:</b>                                     | <p><b>Background:</b> The blunt snout bream, <i>Megalobrama amblycephala</i>, is the economically most important cyprinid fish species. As an herbivore, it can be grown by eco-friendly and resource-conserving aquaculture. However, the large number of intermuscular bones in the trunk musculature is adverse to fish meat processing and consumption.</p> <p><b>Results:</b> As a first towards optimizing this aquatic livestock, we present a 1.116-Gb draft genome of <i>M. amblycephala</i>, with 779.54 Mb anchored on 24 linkage groups. Integrating spatiotemporal transcriptome analyses we show that intermuscular bone is formed in the more basal teleosts by intramembranous ossification, and may be involved in muscle contractibility and coordinating cellular events. Comparative analysis revealed that olfactory receptor genes, especially of the beta type, underwent an extensive expansion in herbivorous cyprinids, whereas the gene for the umami receptor T1R1 was specifically lost in <i>M. amblycephala</i>. The composition of gut microflora, which contributes to the herbivorous adaptation of <i>M. amblycephala</i>, was found to be similar to that of other herbivores.</p> <p><b>Conclusions:</b> As a valuable resource for improvement of <i>M. amblycephala</i> livestock, the draft genome sequence offers new insights into the development of intermuscular bone and herbivorous adaptation.</p> |
| <b>Corresponding Author:</b>                         | Weimin Wang<br><br>CHINA                                                                                                                                                                                                                                                                                                                                                                                                                                                                                                                                                                                                                                                                                                                                                                                                                                                                                                                                                                                                                                                                                                                                                                                                                                                                                                                                                                                                                           |
| <b>Corresponding Author Secondary Information:</b>   |                                                                                                                                                                                                                                                                                                                                                                                                                                                                                                                                                                                                                                                                                                                                                                                                                                                                                                                                                                                                                                                                                                                                                                                                                                                                                                                                                                                                                                                    |
| <b>Corresponding Author's Institution:</b>           |                                                                                                                                                                                                                                                                                                                                                                                                                                                                                                                                                                                                                                                                                                                                                                                                                                                                                                                                                                                                                                                                                                                                                                                                                                                                                                                                                                                                                                                    |
| <b>Corresponding Author's Secondary Institution:</b> |                                                                                                                                                                                                                                                                                                                                                                                                                                                                                                                                                                                                                                                                                                                                                                                                                                                                                                                                                                                                                                                                                                                                                                                                                                                                                                                                                                                                                                                    |
| <b>First Author:</b>                                 | Han Liu                                                                                                                                                                                                                                                                                                                                                                                                                                                                                                                                                                                                                                                                                                                                                                                                                                                                                                                                                                                                                                                                                                                                                                                                                                                                                                                                                                                                                                            |
| <b>First Author Secondary Information:</b>           |                                                                                                                                                                                                                                                                                                                                                                                                                                                                                                                                                                                                                                                                                                                                                                                                                                                                                                                                                                                                                                                                                                                                                                                                                                                                                                                                                                                                                                                    |
| <b>Order of Authors:</b>                             | Han Liu                                                                                                                                                                                                                                                                                                                                                                                                                                                                                                                                                                                                                                                                                                                                                                                                                                                                                                                                                                                                                                                                                                                                                                                                                                                                                                                                                                                                                                            |
|                                                      | Chunhai Chen                                                                                                                                                                                                                                                                                                                                                                                                                                                                                                                                                                                                                                                                                                                                                                                                                                                                                                                                                                                                                                                                                                                                                                                                                                                                                                                                                                                                                                       |
|                                                      | Zexia Gao                                                                                                                                                                                                                                                                                                                                                                                                                                                                                                                                                                                                                                                                                                                                                                                                                                                                                                                                                                                                                                                                                                                                                                                                                                                                                                                                                                                                                                          |
|                                                      | Jiumeng Min                                                                                                                                                                                                                                                                                                                                                                                                                                                                                                                                                                                                                                                                                                                                                                                                                                                                                                                                                                                                                                                                                                                                                                                                                                                                                                                                                                                                                                        |
|                                                      | Yongming Gu                                                                                                                                                                                                                                                                                                                                                                                                                                                                                                                                                                                                                                                                                                                                                                                                                                                                                                                                                                                                                                                                                                                                                                                                                                                                                                                                                                                                                                        |
|                                                      | Jianbo Jian                                                                                                                                                                                                                                                                                                                                                                                                                                                                                                                                                                                                                                                                                                                                                                                                                                                                                                                                                                                                                                                                                                                                                                                                                                                                                                                                                                                                                                        |
|                                                      | Xiewu Jiang                                                                                                                                                                                                                                                                                                                                                                                                                                                                                                                                                                                                                                                                                                                                                                                                                                                                                                                                                                                                                                                                                                                                                                                                                                                                                                                                                                                                                                        |
|                                                      | Huimin Cai                                                                                                                                                                                                                                                                                                                                                                                                                                                                                                                                                                                                                                                                                                                                                                                                                                                                                                                                                                                                                                                                                                                                                                                                                                                                                                                                                                                                                                         |
|                                                      | Ingo Ebersberger                                                                                                                                                                                                                                                                                                                                                                                                                                                                                                                                                                                                                                                                                                                                                                                                                                                                                                                                                                                                                                                                                                                                                                                                                                                                                                                                                                                                                                   |
|                                                      | Meng Xu                                                                                                                                                                                                                                                                                                                                                                                                                                                                                                                                                                                                                                                                                                                                                                                                                                                                                                                                                                                                                                                                                                                                                                                                                                                                                                                                                                                                                                            |
|                                                      | Xinhui Zhang                                                                                                                                                                                                                                                                                                                                                                                                                                                                                                                                                                                                                                                                                                                                                                                                                                                                                                                                                                                                                                                                                                                                                                                                                                                                                                                                                                                                                                       |
|                                                      | Jianwei Chen                                                                                                                                                                                                                                                                                                                                                                                                                                                                                                                                                                                                                                                                                                                                                                                                                                                                                                                                                                                                                                                                                                                                                                                                                                                                                                                                                                                                                                       |

|                                                |                                                                                                                                                                                                                                                                                                                                                                                                                                                                                                                                                                                                                                                                                                                                                                                                                                                                                                                                                                                                                                                                                                                                                                                                                                                                                                                                                                                                                                                                                                                                                                                                                                                                                                                                                       |
|------------------------------------------------|-------------------------------------------------------------------------------------------------------------------------------------------------------------------------------------------------------------------------------------------------------------------------------------------------------------------------------------------------------------------------------------------------------------------------------------------------------------------------------------------------------------------------------------------------------------------------------------------------------------------------------------------------------------------------------------------------------------------------------------------------------------------------------------------------------------------------------------------------------------------------------------------------------------------------------------------------------------------------------------------------------------------------------------------------------------------------------------------------------------------------------------------------------------------------------------------------------------------------------------------------------------------------------------------------------------------------------------------------------------------------------------------------------------------------------------------------------------------------------------------------------------------------------------------------------------------------------------------------------------------------------------------------------------------------------------------------------------------------------------------------------|
|                                                | Wei Luo                                                                                                                                                                                                                                                                                                                                                                                                                                                                                                                                                                                                                                                                                                                                                                                                                                                                                                                                                                                                                                                                                                                                                                                                                                                                                                                                                                                                                                                                                                                                                                                                                                                                                                                                               |
|                                                | Boxiang Chen                                                                                                                                                                                                                                                                                                                                                                                                                                                                                                                                                                                                                                                                                                                                                                                                                                                                                                                                                                                                                                                                                                                                                                                                                                                                                                                                                                                                                                                                                                                                                                                                                                                                                                                                          |
|                                                | Junhui Chen                                                                                                                                                                                                                                                                                                                                                                                                                                                                                                                                                                                                                                                                                                                                                                                                                                                                                                                                                                                                                                                                                                                                                                                                                                                                                                                                                                                                                                                                                                                                                                                                                                                                                                                                           |
|                                                | Hong Liu                                                                                                                                                                                                                                                                                                                                                                                                                                                                                                                                                                                                                                                                                                                                                                                                                                                                                                                                                                                                                                                                                                                                                                                                                                                                                                                                                                                                                                                                                                                                                                                                                                                                                                                                              |
|                                                | Jiang Li                                                                                                                                                                                                                                                                                                                                                                                                                                                                                                                                                                                                                                                                                                                                                                                                                                                                                                                                                                                                                                                                                                                                                                                                                                                                                                                                                                                                                                                                                                                                                                                                                                                                                                                                              |
|                                                | Ruifang Lai                                                                                                                                                                                                                                                                                                                                                                                                                                                                                                                                                                                                                                                                                                                                                                                                                                                                                                                                                                                                                                                                                                                                                                                                                                                                                                                                                                                                                                                                                                                                                                                                                                                                                                                                           |
|                                                | Mingzhou Bai                                                                                                                                                                                                                                                                                                                                                                                                                                                                                                                                                                                                                                                                                                                                                                                                                                                                                                                                                                                                                                                                                                                                                                                                                                                                                                                                                                                                                                                                                                                                                                                                                                                                                                                                          |
|                                                | Jin Wei                                                                                                                                                                                                                                                                                                                                                                                                                                                                                                                                                                                                                                                                                                                                                                                                                                                                                                                                                                                                                                                                                                                                                                                                                                                                                                                                                                                                                                                                                                                                                                                                                                                                                                                                               |
|                                                | Shaokui Yi                                                                                                                                                                                                                                                                                                                                                                                                                                                                                                                                                                                                                                                                                                                                                                                                                                                                                                                                                                                                                                                                                                                                                                                                                                                                                                                                                                                                                                                                                                                                                                                                                                                                                                                                            |
|                                                | Huanling Wang                                                                                                                                                                                                                                                                                                                                                                                                                                                                                                                                                                                                                                                                                                                                                                                                                                                                                                                                                                                                                                                                                                                                                                                                                                                                                                                                                                                                                                                                                                                                                                                                                                                                                                                                         |
|                                                | Xiaojuan Cao                                                                                                                                                                                                                                                                                                                                                                                                                                                                                                                                                                                                                                                                                                                                                                                                                                                                                                                                                                                                                                                                                                                                                                                                                                                                                                                                                                                                                                                                                                                                                                                                                                                                                                                                          |
|                                                | Xiaoyun Zhou                                                                                                                                                                                                                                                                                                                                                                                                                                                                                                                                                                                                                                                                                                                                                                                                                                                                                                                                                                                                                                                                                                                                                                                                                                                                                                                                                                                                                                                                                                                                                                                                                                                                                                                                          |
|                                                | Yuhua Zhao                                                                                                                                                                                                                                                                                                                                                                                                                                                                                                                                                                                                                                                                                                                                                                                                                                                                                                                                                                                                                                                                                                                                                                                                                                                                                                                                                                                                                                                                                                                                                                                                                                                                                                                                            |
|                                                | Kaijian Wei                                                                                                                                                                                                                                                                                                                                                                                                                                                                                                                                                                                                                                                                                                                                                                                                                                                                                                                                                                                                                                                                                                                                                                                                                                                                                                                                                                                                                                                                                                                                                                                                                                                                                                                                           |
|                                                | Ruibin Yang                                                                                                                                                                                                                                                                                                                                                                                                                                                                                                                                                                                                                                                                                                                                                                                                                                                                                                                                                                                                                                                                                                                                                                                                                                                                                                                                                                                                                                                                                                                                                                                                                                                                                                                                           |
|                                                | Bingnan Liu                                                                                                                                                                                                                                                                                                                                                                                                                                                                                                                                                                                                                                                                                                                                                                                                                                                                                                                                                                                                                                                                                                                                                                                                                                                                                                                                                                                                                                                                                                                                                                                                                                                                                                                                           |
|                                                | Shancen Zhao                                                                                                                                                                                                                                                                                                                                                                                                                                                                                                                                                                                                                                                                                                                                                                                                                                                                                                                                                                                                                                                                                                                                                                                                                                                                                                                                                                                                                                                                                                                                                                                                                                                                                                                                          |
|                                                | Xiaodong Fang                                                                                                                                                                                                                                                                                                                                                                                                                                                                                                                                                                                                                                                                                                                                                                                                                                                                                                                                                                                                                                                                                                                                                                                                                                                                                                                                                                                                                                                                                                                                                                                                                                                                                                                                         |
|                                                | Manfred Scharl                                                                                                                                                                                                                                                                                                                                                                                                                                                                                                                                                                                                                                                                                                                                                                                                                                                                                                                                                                                                                                                                                                                                                                                                                                                                                                                                                                                                                                                                                                                                                                                                                                                                                                                                        |
|                                                | Xueqiao Qian                                                                                                                                                                                                                                                                                                                                                                                                                                                                                                                                                                                                                                                                                                                                                                                                                                                                                                                                                                                                                                                                                                                                                                                                                                                                                                                                                                                                                                                                                                                                                                                                                                                                                                                                          |
|                                                | Weimin Wang                                                                                                                                                                                                                                                                                                                                                                                                                                                                                                                                                                                                                                                                                                                                                                                                                                                                                                                                                                                                                                                                                                                                                                                                                                                                                                                                                                                                                                                                                                                                                                                                                                                                                                                                           |
| <b>Order of Authors Secondary Information:</b> |                                                                                                                                                                                                                                                                                                                                                                                                                                                                                                                                                                                                                                                                                                                                                                                                                                                                                                                                                                                                                                                                                                                                                                                                                                                                                                                                                                                                                                                                                                                                                                                                                                                                                                                                                       |
| <b>Response to Reviewers:</b>                  | <p>16 March 2017<br/> Dr. Hans Zauner<br/> Journal: GigaScience</p> <p>Dear Dr. Zauner,</p> <p>Manuscript No.: GIGA-D-16-00088R1<br/> Title: "The draft genome of <i>Megalobrama amblycephala</i> reveals the development of intermuscular bone and adaptation to herbivorous diet"<br/> Author(s): Han Liu, Chunhai Chen, Zexia Gao, Jiumeng Min, Yongming Gu, Jianbo Jian, Xiewu Jiang, Huimin Cai, Ingo Ebersberger, Meng Xu, Xinhui Zhang, Jianwei Chen, Wei Luo, Boxiang Chen, Junhui Chen, Hong Liu, Jiang Li, Ruifang Lai, Mingzhou Bai, Jin Wei, Shaokui Yi, Huanling Wang, Xiaojuan Cao, Xiaoyun Zhou, Yuhua Zhao, Kaijian Wei, Ruibin Yang, Bingnan Liu, Shancen Zhao, Xiaodong Fang, Manfred Scharl, Xueqiao Qian, Weimin Wang</p> <p>We have carefully read the referee's comments which you forwarded to us with your email of 20 January 2017. We would like to express our sincere thanks to the reviewer for the constructive comments. We have now addressed all the suggestions, and the manuscript has been edited accordingly. The major amendments are highlighted in red in the revised manuscript. Responses to the reviewer's comments are detailed below in this letter. Because of the amendments, the page and the line numbers referred to by the referee have now changed in the edited version of the manuscript. Please, note that all raw reads of genome sequencing and RAD-seq have been deposited at NCBI. Other data including assemblies, annotations, RNA-seq data, microbiome data, embedded image data and SNP markers were uploaded to the indicated ftp. We hope that with the amendments made in response to the reviewer's comments, the manuscript is now acceptable for publication in GigaScience.</p> |

I look forward to hearing from you soon.

Yours sincerely,  
Weimin Wang (PhD) (Correspondence author)  
College of Fisheries  
Huazhong Agricultural University  
Wuhan 430070, P. R. China  
E-mail address: wangwm@mail.hzau.edu.cn  
Tel: +86-27-8728 4292; Fax: +86-27-8728 4292

Response to Reviewer

Reviewer Report

Reviewer #2: It is quite demanding to properly review a paper with this amount of data and therefore the structure of the manuscript is very important. In addition, a figure showing the overview of the workflow would have been helpful.

Author response: We have now included a schematic figure to show the workflow that should be helpful for a better understanding of the workflow behind the data presented in the supporting information as additional file 1: Figure S2. (Line 92)

Concerns of Reviewer 1 and 2 are partially answered and altered accordingly in the manuscript. However some important aspects have to be addressed prior to acceptance.

1. Database submission: All raw data and molecular markers have to be available. The submission to the NCBI SRA database is not sufficient as this database is for sequencing data. There are specific databases for molecular markers such as SNPs.

Author response: We have uploaded the assemblies, annotations, RNA-seq, microbiome data and molecular markers (SNPs) to the ftp (<ftp://user28@climb.genomics.cn>). The URL is included in the revised manuscript.

2. Still the structure has to be revised and the outcome better worked out. The result section comprises parts of the discussion and the discussion contains again descriptions of the results. Line 227 -228 is just one example.

Author response: We have now carefully revised the manuscript according to your suggestions. The parts of the discussion in the results section have been removed and we also refined the discussion section.

3. The reading of the manuscript is still tedious as no structure /concept of the work is given.

Author response: According to your suggestions, we have now carefully revised the manuscript. We hope it is now clear and structured for reading and understanding with these changes and the additional file 1: Figure S2 showing the workflow.

4. Description of the differential expression analysis remains poor. No numbers of significant expressed transcripts are given nor was any further meta-analysis performed. In addition the threshold for significance has not been provided. The sentence at line 502 "DEGs were detected using DESeq" is not informative enough.  
Author response: We are sorry for the simple description about differential expression analysis. In the first submitted Supplementary Note, we had detailed the transcriptome analyses. Because there is no Supplementary Note section in the Journal, we deleted it and selectively added some necessary information in the Methods section of the manuscript. We have now clarified these questions in the new revised manuscript according to your suggestions. (Line 175-177, 184-193, 492-496)

5. Line 167 the word "many" in the results section is not an appropriate expression here.

Author response: This sentence has been modified. (Line 163-166)

6. Please provide revised Figure files.

Author response: The revised Figure files are now attached with this new revised manuscript.

7. Still authors do not explain what is meant by "expanded gene families". Figure 2C does not show "gene families" but GO categories. E.g myosin complex belongs to

|                                                                                                                                                                                                                                                                                                                                                                         |                                                                                                                                                                                                                                                                                                                                                                                                                                                                                                                                                                                                                                                                                                                                                                                                                                                                                                                                                                                                                                                                                                                                                                                                                                                                                                                                                                                                                                                                                                                                                                                                                                                                                                          |
|-------------------------------------------------------------------------------------------------------------------------------------------------------------------------------------------------------------------------------------------------------------------------------------------------------------------------------------------------------------------------|----------------------------------------------------------------------------------------------------------------------------------------------------------------------------------------------------------------------------------------------------------------------------------------------------------------------------------------------------------------------------------------------------------------------------------------------------------------------------------------------------------------------------------------------------------------------------------------------------------------------------------------------------------------------------------------------------------------------------------------------------------------------------------------------------------------------------------------------------------------------------------------------------------------------------------------------------------------------------------------------------------------------------------------------------------------------------------------------------------------------------------------------------------------------------------------------------------------------------------------------------------------------------------------------------------------------------------------------------------------------------------------------------------------------------------------------------------------------------------------------------------------------------------------------------------------------------------------------------------------------------------------------------------------------------------------------------------|
|                                                                                                                                                                                                                                                                                                                                                                         | <p>GO:0016459. A gene family comprises similar genes, formed by duplication of a single original gene. Those genes normally have also similar biochemical functions. The most known example is the family comprising the human hemoglobin subunits.<br/> Author response: We apologize for the confusion. Indeed, Figure 2C does not show expanded gene families but the over-represented GO annotations of cyprinid-specific expansion genes. This has been corrected now in the manuscript and the figure legends. (Line 169-170, 787)</p> <p>8. What is meant by "resource friendly"? It is still not clear what the authors want to pinpoint to.<br/> Author response: This sentence was ambiguous and we apologize for the confusion that it generated. This sentence has been re-phrased and reads now: "Reports on draft genomes of herbivorous and omnivorous species....." in the revised manuscript. (Line 69)</p> <p>9. Line 83 change expression: "remain obscure"<br/> Author response: This sentence has been re-phrased and reads now: "the molecular genetic basis and the evolution of this unique structure are still unclear". (Line 82)</p> <p>10. Line 88: "many miRNA-mRNA interactions" not really informative.<br/> Author response: This sentence has been re-phrased and reads now: "1,136 miRNA-mRNA interaction pairs". (Line 87)</p> <p>11. Line 129 "psuedo-chromosomes". Most probably "pseudo-chromosomes" are meant. Please carefully proof read the manuscript for typos and inadequate expressions.<br/> Author response: We apologize for the spelling mistake. It should be "pseudo-chromosomes". This has been corrected in the revised manuscript. (Line 129)</p> |
| <b>Additional Information:</b>                                                                                                                                                                                                                                                                                                                                          |                                                                                                                                                                                                                                                                                                                                                                                                                                                                                                                                                                                                                                                                                                                                                                                                                                                                                                                                                                                                                                                                                                                                                                                                                                                                                                                                                                                                                                                                                                                                                                                                                                                                                                          |
| <b>Question</b>                                                                                                                                                                                                                                                                                                                                                         | <b>Response</b>                                                                                                                                                                                                                                                                                                                                                                                                                                                                                                                                                                                                                                                                                                                                                                                                                                                                                                                                                                                                                                                                                                                                                                                                                                                                                                                                                                                                                                                                                                                                                                                                                                                                                          |
| Are you submitting this manuscript to a special series or article collection?                                                                                                                                                                                                                                                                                           | No                                                                                                                                                                                                                                                                                                                                                                                                                                                                                                                                                                                                                                                                                                                                                                                                                                                                                                                                                                                                                                                                                                                                                                                                                                                                                                                                                                                                                                                                                                                                                                                                                                                                                                       |
| <b>Experimental design and statistics</b>                                                                                                                                                                                                                                                                                                                               | Yes                                                                                                                                                                                                                                                                                                                                                                                                                                                                                                                                                                                                                                                                                                                                                                                                                                                                                                                                                                                                                                                                                                                                                                                                                                                                                                                                                                                                                                                                                                                                                                                                                                                                                                      |
| Full details of the experimental design and statistical methods used should be given in the Methods section, as detailed in our <a href="#">Minimum Standards Reporting Checklist</a> . Information essential to interpreting the data presented should be made available in the figure legends.                                                                        |                                                                                                                                                                                                                                                                                                                                                                                                                                                                                                                                                                                                                                                                                                                                                                                                                                                                                                                                                                                                                                                                                                                                                                                                                                                                                                                                                                                                                                                                                                                                                                                                                                                                                                          |
| Have you included all the information requested in your manuscript?                                                                                                                                                                                                                                                                                                     |                                                                                                                                                                                                                                                                                                                                                                                                                                                                                                                                                                                                                                                                                                                                                                                                                                                                                                                                                                                                                                                                                                                                                                                                                                                                                                                                                                                                                                                                                                                                                                                                                                                                                                          |
| <b>Resources</b>                                                                                                                                                                                                                                                                                                                                                        | Yes                                                                                                                                                                                                                                                                                                                                                                                                                                                                                                                                                                                                                                                                                                                                                                                                                                                                                                                                                                                                                                                                                                                                                                                                                                                                                                                                                                                                                                                                                                                                                                                                                                                                                                      |
| A description of all resources used, including antibodies, cell lines, animals and software tools, with enough information to allow them to be uniquely identified, should be included in the Methods section. Authors are strongly encouraged to cite <a href="#">Research Resource Identifiers</a> (RRIDs) for antibodies, model organisms and tools, where possible. |                                                                                                                                                                                                                                                                                                                                                                                                                                                                                                                                                                                                                                                                                                                                                                                                                                                                                                                                                                                                                                                                                                                                                                                                                                                                                                                                                                                                                                                                                                                                                                                                                                                                                                          |



|                                                                                                                                                                                                                                                                                                                                                                                                                                                                                                                                                         |            |
|---------------------------------------------------------------------------------------------------------------------------------------------------------------------------------------------------------------------------------------------------------------------------------------------------------------------------------------------------------------------------------------------------------------------------------------------------------------------------------------------------------------------------------------------------------|------------|
| <p>Have you included the information requested as detailed in our <a href="#">Minimum Standards Reporting Checklist</a>?</p>                                                                                                                                                                                                                                                                                                                                                                                                                            |            |
| <p><b>Availability of data and materials</b></p> <p>All datasets and code on which the conclusions of the paper rely must be either included in your submission or deposited in <a href="#">publicly available repositories</a> (where available and ethically appropriate), referencing such data using a unique identifier in the references and in the “Availability of Data and Materials” section of your manuscript.</p> <p>Have you have met the above requirement as detailed in our <a href="#">Minimum Standards Reporting Checklist</a>?</p> | <p>Yes</p> |

1 16 March 2017

2 Dr. Hans Zauner

3  
4 Journal: GigaScience

5  
6  
7 Dear Dr. Zauner,

8  
9 **Manuscript No.: GIGA-D-16-00088R1**

10 Title: **"The draft genome of *Megalobrama amblycephala* reveals the development of**  
11 **intermuscular bone and adaptation to herbivorous diet"**

12  
13 Author(s): Han Liu, Chunhai Chen, Zexia Gao, Jiumeng Min, Yongming Gu, Jianbo Jian, Xiewu  
14 Jiang, Huimin Cai, Ingo Ebersberger, Meng Xu, Xinhui Zhang, Jianwei Chen, Wei Luo, Boxiang  
15 Chen, Junhui Chen, Hong Liu, Jiang Li, Ruifang Lai, Mingzhou Bai, Jin Wei, Shaokui Yi,  
16 Huanling Wang, Xiaojuan Cao, Xiaoyun Zhou, Yuhua Zhao, Kaijian Wei, Ruibin Yang, Bingnan  
17 Liu, Shancen Zhao, Xiaodong Fang, Manfred Schartl, Xueqiao Qian, Weimin Wang  
18  
19  
20  
21  
22  
23

24 We have carefully read the referee's comments which you forwarded to us with your email of 20  
25 January 2017. We would like to express our sincere thanks to the reviewer for the constructive  
26 comments. We have now addressed all the suggestions, and the manuscript has been edited  
27 accordingly. The major amendments are highlighted in red in the revised manuscript. Responses to  
28 the reviewer's comments are detailed below in this letter. Because of the amendments, the page  
29 and the line numbers referred to by the referee have now changed in the edited version of the  
30 manuscript. Please, note that all raw reads of genome sequencing and RAD-seq have been  
31 deposited at NCBI. Other data including assemblies, annotations, RNA-seq data, microbiome data,  
32 embedded image data and SNP markers were uploaded to the indicated ftp. We hope that with the  
33 amendments made in response to the reviewer's comments, the manuscript is now acceptable for  
34 publication in GigaScience.  
35  
36  
37  
38  
39  
40  
41  
42  
43

44 I look forward to hearing from you soon.

45  
46 Yours sincerely,

47 Weimin Wang (PhD) (Correspondence author)

48 College of Fisheries

49 Huazhong Agricultural University

50 Wuhan 430070, P. R. China

51 E-mail address: [wangwm@mail.hzau.edu.cn](mailto:wangwm@mail.hzau.edu.cn)

52 Tel: +86-27-8728 4292; Fax: +86-27-8728 4292  
53  
54  
55  
56  
57  
58  
59  
60  
61  
62  
63  
64  
65

## Response to Reviewer

### Reviewer Report

**Reviewer #2:** It is quite demanding to properly review a paper with this amount of data and therefore the structure of the manuscript is very important. In addition, a figure showing the overview of the workflow would have been helpful.

**Author response:** We have now included a schematic figure to show the workflow that should be helpful for a better understanding of the workflow behind the data presented in the supporting information as additional file 1: Figure S2. (Line 92)

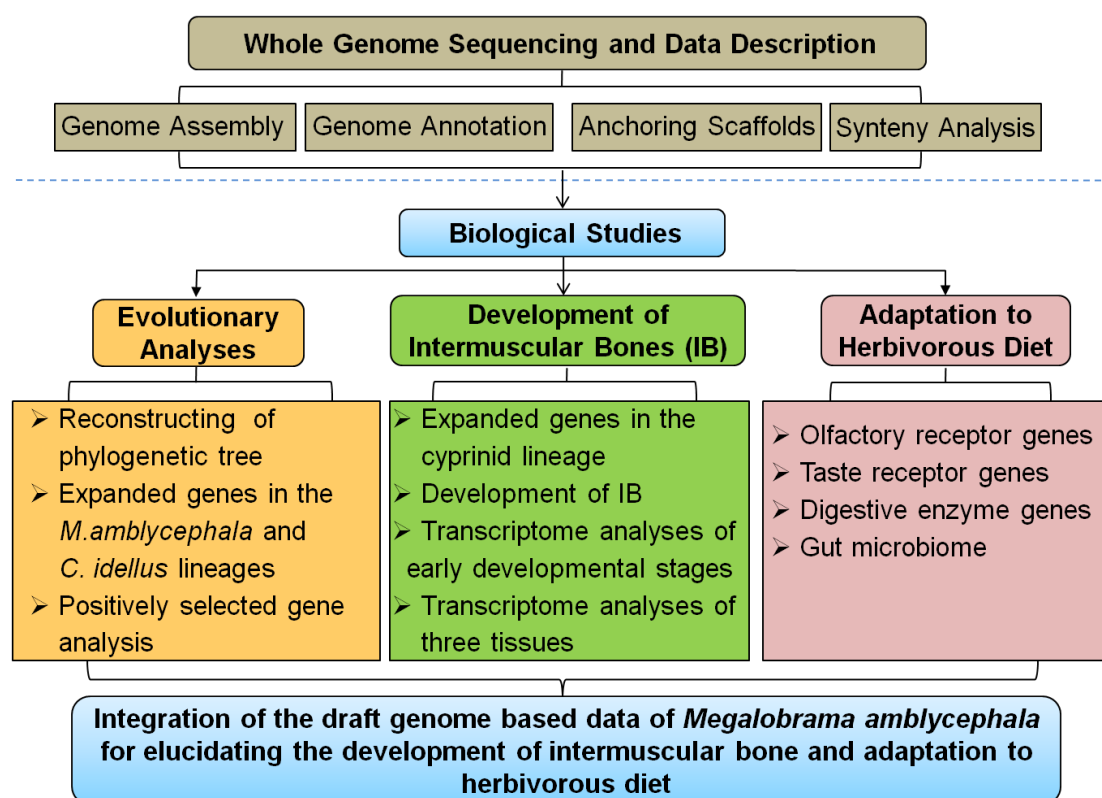

Additional file 1: Figure S2 Schematic diagram illustrating the workflow of *M. Amblycephala* genome.

Concerns of Reviewer 1 and 2 are partially answered and altered accordingly in the manuscript. However some important aspects have to be addressed prior to acceptance.

1. Database submission: All raw data and molecular markers have to be available. The submission to the NCBI SRA database is not sufficient as this database is for sequencing data. There are specific databases for molecular markers such as SNPs.

**Author response:** We have uploaded the assemblies, annotations, RNA-seq, microbiome data and

1 molecular markers (SNPs) to the ftp (ftp://user28@climb.genomics.cn). The URL is included in  
2 the revised manuscript.  
3

4  
5 2. Still the structure has to be revised and the outcome better worked out. The result section  
6 comprises parts of the discussion and the discussion contains again descriptions of the results.  
7  
8 Line 227 -228 is just one example.  
9

10 **Author response:** We have now carefully revised the manuscript according to your suggestions.  
11  
12 The parts of the discussion in the results section have been removed and we also refined the  
13 discussion section.  
14  
15  
16

17  
18 3. The reading of the manuscript is still tedious as no structure /concept of the work is given.  
19

20 **Author response:** According to your suggestions, we have now carefully revised the manuscript.  
21  
22 We hope it is now clear and structured for reading and understanding with these changes and the  
23 additional file 1: Figure S2 showing the workflow.  
24  
25  
26

27 4. Description of the differential expression analysis remains poor. No numbers of significant  
28 expressed transcripts are given nor was any further meta-analysis performed. In addition the  
29 threshold for significance has not been provided. The sentence at line 502 "DEGs were detected  
30 using DESeq" is not informative enough.  
31  
32  
33

34 **Author response:** We are sorry for the simple description about differential expression analysis.  
35  
36 In the first submitted Supplementary Note, we had detailed the transcriptome analyses. Because  
37 there is no Supplementary Note section in the Journal, we deleted it and selectively added some  
38 necessary information in the Methods section of the manuscript. We have now clarified these  
39 questions in the new revised manuscript according to your suggestions. (Line 175-177, 184-193,  
40 492-496)  
41  
42  
43  
44  
45  
46

47  
48 5. Line 167 the word "many" in the results section is not an appropriate expression here.  
49

50 **Author response:** This sentence has been modified. (Line 163-166)  
51  
52

53 6. Please provide revised Figure files.  
54

55 **Author response:** The revised Figure files are now attached with this new revised manuscript.  
56  
57

58 7. Still authors do not explain what is meant by "expanded gene families". Figure 2C does not  
59 show "gene families" but GO categories. E.g myosin complex belongs to GO:0016459. A gene  
60  
61  
62  
63  
64  
65

1 family comprises similar genes, formed by duplication of a single original gene. Those genes  
2 normally have also similar biochemical functions. The most known example is the family  
3 comprising the human hemoglobin subunits.  
4  
5

6 **Author response:** We apologize for the confusion. Indeed, Figure 2C does not show expanded  
7 gene families but the over-represented GO annotations of cyprinid-specific expansion genes. This  
8 has been corrected now in the manuscript and the figure legends. (Line 169-170, 787)  
9

10  
11  
12  
13 8. What is meant by "resource friendly"? It is still not clear what the authors want to pinpoint to.  
14

15 **Author response:** This sentence was ambiguous and we apologize for the confusion that it  
16 generated. This sentence has been re-phrased and reads now: "Reports on draft genomes of  
17 herbivorous and omnivorous species....." in the revised manuscript. (Line 69)  
18  
19  
20  
21

22 9. Line 83 change expression: "remain obscure"  
23

24 **Author response:** This sentence has been re-phrased and reads now: "the molecular genetic basis  
25 and the evolution of this unique structure are still unclear". (Line 82)  
26  
27  
28

29 10. Line 88: "many miRNA-mRNA interactions" not really informative.  
30

31 **Author response:** This sentence has been re-phrased and reads now: "1,136 miRNA-mRNA  
32 interaction pairs". (Line 87)  
33  
34  
35

36 11. Line 129 "psuedo-chromosomes". Most probably "pseudo-chromosomes" are meant. Please  
37 carefully proof read the manuscript for typos and inadequate expressions.  
38  
39

40 **Author response:** We apologize for the spelling mistake. It should be "pseudo-chromosomes".  
41 This has been corrected in the revised manuscript. (Line 129)  
42  
43  
44

45 --  
46

47 Please also take a moment to check our website at for any additional comments that were saved as  
48 attachments. Please note that as GigaScience has a policy of open peer review, you will be able to  
49 see the names of the reviewers.  
50  
51  
52  
53  
54  
55  
56  
57  
58  
59  
60  
61  
62  
63  
64  
65

1           1           **The draft genome of *Megalobrama amblycephala* reveals the development of**  
2  
3           2           **intermuscular bone and adaptation to herbivorous diet**

4  
5  
6           3           Han Liu<sup>1†</sup>, Chunhai Chen<sup>2†</sup>, Zexia Gao<sup>1†</sup>, Jiumeng Min<sup>2†</sup>, Yongming Gu<sup>3†</sup>, Jianbo Jian<sup>2†</sup>, Xiewu  
7  
8           4           Jiang<sup>3</sup>, Huimin Cai<sup>2</sup>, Ingo Ebersberger<sup>4</sup>, Meng Xu<sup>2</sup>, Xinhui Zhang<sup>1</sup>, Jianwei Chen<sup>2</sup>, Wei Luo<sup>1</sup>,  
9  
10           5           Boxiang Chen<sup>1,3</sup>, Junhui Chen<sup>2</sup>, Hong Liu<sup>1</sup>, Jiang Li<sup>2</sup>, Ruifang Lai<sup>1</sup>, Mingzhou Bai<sup>2</sup>, Jin Wei<sup>1</sup>,  
11  
12           6           Shaokui Yi<sup>1</sup>, Huanling Wang<sup>1</sup>, Xiaojuan Cao<sup>1</sup>, Xiaoyun Zhou<sup>1</sup>, Yuhua Zhao<sup>1</sup>, Kaijian Wei<sup>1</sup>,  
13  
14           7           Ruibin Yang<sup>1</sup>, Bingnan Liu<sup>3</sup>, Shancen Zhao<sup>2</sup>, Xiaodong Fang<sup>2</sup>, Manfred Schartl<sup>5,\*</sup>, Xueqiao  
15  
16           8           Qian<sup>3,\*</sup>, Weimin Wang<sup>1,\*</sup>

17  
18  
19           9  
20  
21           10           \*Equally contributing corresponding authors: wangwm@mail.hzau.edu.cn; xueqiaoqian@263.net;  
22  
23           11           phch1@biozentrum.uni-wuerzburg.de

24  
25           12           †Equal contributors

26  
27           13           <sup>1</sup>College of Fisheries, Key Lab of Freshwater Animal Breeding, Ministry of Agriculture, Key Lab  
28  
29           14           of Agricultural Animal Genetics, Breeding and Reproduction of Ministry of Education, Huazhong  
30  
31           15           Agricultural University, Wuhan 430070, China

32  
33           16           <sup>2</sup>Beijing Genomics Institute (BGI)-Shenzhen, Shenzhen 518083, China

34  
35           17           <sup>3</sup>Guangdong Haid Group Co., Ltd., Guangzhou 511400, China

36  
37           18           <sup>4</sup>Dept. for Applied Bioinformatics, Institute for Cell Biology and Neuroscience, Goethe University,  
38  
39           19           Frankfurt D-60438, Germany

40  
41           20           <sup>5</sup>Physiological Chemistry, University of Würzburg, Biozentrum, Am Hubland, and Comprehensive  
42  
43           21           Cancer Center Mainfranken, University Clinic Würzburg, Würzburg 97070, Germany and Texas  
44  
45           22           A&M Institute for Advanced Study and Department of Biology, Texas A&M University, College  
46  
47           23           Station, TX 77843, USA

29 **Abstract**

30 **Background:** The blunt snout bream, *Megalobrama amblycephala*, is the economically most  
31 important cyprinid fish species. As an herbivore, it can be grown by eco-friendly and  
32 resource-conserving aquaculture. However, the large number of intermuscular bones in the trunk  
33 musculature is adverse to fish meat processing and consumption.

34 **Results:** As a first towards optimizing this aquatic livestock, we present a 1.116-Gb draft genome  
35 of *M. amblycephala*, with 779.54 Mb anchored on 24 linkage groups. Integrating spatiotemporal  
36 transcriptome analyses we show that intermuscular bone is formed in the more basal teleosts by  
37 intramembranous ossification, and may be involved in muscle contractibility and coordinating  
38 cellular events. Comparative analysis revealed that olfactory receptor genes, especially of the beta  
39 type, underwent an extensive expansion in herbivorous cyprinids, whereas the gene for the umami  
40 receptor *TIR1* was specifically lost in *M. amblycephala*. The composition of gut microflora, which  
41 contributes to the herbivorous adaptation of *M. amblycephala*, was found to be similar to that of  
42 other herbivores.

43 **Conclusions:** As a valuable resource for improvement of *M. amblycephala* livestock, the draft  
44 genome sequence offers new insights into the development of intermuscular bone and herbivorous  
45 adaptation.

46  
47 **Keywords:** *Megalobrama amblycephala*, whole genome, herbivorous diet, intermuscular bone,  
48 transcriptome, gut microflora

## 58 **Background**

59 Fishery and aquaculture play an important role in global alimentation. Over the past decades food  
60 fish supply has been increasing with an annual rate of 3.6 percent, about 2 times faster than the  
61 human population [1]. This growth of fish production is meanwhile solely accomplished by an  
62 extension of aquaculture, as over the past thirty years the total mass of captured fish has remained  
63 almost constant [1]. As a consequence of this emphasis on fish breeding, the genomes of various  
64 economically important fish species, e.g. Atlantic cod (*Gadus morhua*) [2], rainbow trout  
65 (*Oncorhynchus mykiss*) [3], European sea bass (*Dicentrarchus labrax*) [4], yellow croaker  
66 (*Larimichthys crocea*) [5], half-smooth tongue sole (*Cynoglossus semilaevis*) [6], tilapia  
67 (*Oreochromis niloticus*) [7] and channel catfish (*Ictalurus punctatus*) [8] have been sequenced.  
68 Yet, the majority of these species are carnivorous requiring large inputs of protein from wild  
69 caught fish or other precious feed. **Reports on draft genomes of herbivorous and omnivorous**  
70 species, in particular cyprinid fish are scarce. It is well known that cyprinids are currently the  
71 economically most important group of teleosts for sustainable aquaculture. They grow to large  
72 population sizes in the wild and already now account for the majority of freshwater aquaculture  
73 production worldwide [1]. Among these, the herbivorous *Megalobrama amblycephala* (Yih, 1955),  
74 a particularly eco-friendly and resource-conserving species, is predominant in aquaculture and has  
75 been greatly developed in China (Additional file 1: Figure S1) [1]. However, most cyprinids,  
76 including *M. amblycephala*, have a large number of intermuscular bones (IBs) in the trunk  
77 musculature, which have an adverse effect on fish meat processing and consumption. IBs—a  
78 unique form of bone occurring only in the more basal teleosts—are completely embedded within  
79 the myosepta and are not connected to the vertebral column or any other bones [9, 10]. Our  
80 previous study on IB development of *M. amblycephala* revealed that some miRNA-mRNA  
81 interaction pairs may be involved in regulating bone development and differentiation [11].  
82 **However, the molecular genetic basis and the evolution of this unique structure are still unclear.**  
83 Unfortunately, the recent sequencing of two cyprinid genomes common carp (*Cyprinus carpio*)  
84 [12] and grass carp (*Ctenopharyngodon idellus*) [13], which provided valuable information for  
85 their genetic breeding, contributed little to the understanding of IB formation.

86 In an initial genome survey of *M. amblycephala*, we identified 25,697 single-nucleotide



1  
2  
3  
4  
5  
6  
7  
8  
9  
10  
11  
12  
13  
14  
15  
16  
17  
18  
19  
20  
21  
22  
23  
24  
25  
26  
27  
28  
29  
30  
31  
32  
33  
34  
35  
36  
37  
38  
39  
40  
41  
42  
43  
44  
45  
46  
47  
48  
49  
50  
51  
52  
53  
54  
55  
56  
57  
58  
59  
60  
61  
62  
63  
64  
65

87 polymorphism (SNP) [14], 347 conserved miRNAs [15], and 1,136 miRNA-mRNA interaction  
88 pairs [11]. However, lack of a whole genome sequence resource limited a thorough investigation  
89 of *M. amblycephala*. Here we report the first high-quality draft genome sequence of *M.*  
90 *amblycephala*. Integrating this novel genome resource with tissue- and developmental  
91 stage-specific gene expression information, as well as with meta-genome data to investigate the  
92 composition of the gut microbiome (Workflow shown in additional file 1: Figure S2) provides  
93 relevant insights into the function and evolution of two key features characterizing this species:  
94 The formation of IB and the adaptation to herbivory. By that our study lays the foundation for  
95 genetically optimizing *M. amblycephala* to further increase its relevance for securing human food  
96 supply.

## 97 **Data description**

### 98 **Genome Assembly and Annotation**

99 The *M. amblycephala* genome was sequenced and assembled by a whole-genome shotgun strategy  
100 using genomic DNA from a double-haploid fish (Additional file 1: Table S1). We assembled a  
101 1.116 Gb reference genome sequence from 142.55 Gb (approximately 130-fold coverage) of clean  
102 data [16] (Additional file 1: Tables S1 and S2, Figure S3). The contig and scaffold N50 lengths  
103 reached 49 Kb and 839 Kb, respectively (Table 1). The largest scaffold spans 8,951 Kb and the  
104 4,034 largest scaffolds cover 90% of the assembly. To assess the genome assembly quality, the  
105 mapping of paired end sequence data from the short-insert size WGS libraries, as well as of  
106 published ESTs [14] (Additional file 1: Tables S3 and S4) against the genome assembly indicated  
107 that the number and extent of misassemblies is low. To further estimate the completeness of the  
108 assembly and gene prediction, the benchmarking universal single-copy orthologs (BUSCO) [17]  
109 analysis was used and the results showed that the assembly contains 81.4% complete and 9.1%  
110 partial vertebrate BUSCO orthologues (Additional file 1: Table S5).

111 The *M. amblycephala* genome has an average GC content of 37.3%, similar to cyprinid *C.*  
112 *carpio* and *Danio rerio* (Additional file 1: Figure S4). Using a comprehensive annotation strategy  
113 combining RNA-seq derived transcript evidence, *de-novo* gene prediction and sequence similarity  
114 to proteins from five further fish species, we annotated a total of 23,696 protein-coding genes  
115 (Additional file 1: Table S6). Of the predicted genes, 99.44% (23,563 genes) are annotated by

116 functional database. In addition, we identified 1,796 non-coding RNAs including 474 miRNAs,  
117 220 rRNA, 530 tRNAs, and 572 snRNAs. Transposable elements (TEs) comprise approximately  
118 34.18% (381.3 Mb) of the *M. amblycephala* genome (Additional file 1: Table S7). DNA  
119 transposons (23.80%) and long terminal repeat retrotransposons (LTRs) (9.89%) are the most  
120 abundant TEs in *M. amblycephala*. The proportion of LTRs in *M. amblycephala* is highest in  
121 comparison with other teleosts: *G. morhua* (4.88%) [2], *L. crocea* (2.2%) [5], *C. semilaevis*  
122 (0.08%) [6], *C. carpio* (2.28%) [12], *C. idellus* (2.58%) [13] and stickleback (*Gasterosteus*  
123 *aculeatus*) (1.9%) [18] (Additional file 1: Tables S7 and S8, Figure S5). The distribution of  
124 divergence between the TEs in *M. amblycephala* peaks at 7% (Additional file 1: Figure S6),  
125 indicating a more recent activity of these TEs when compared with *O. mykiss* (13%) [3] and *C.*  
126 *semilaevis* (9%) [6].

### 127 **Anchoring Scaffolds and Shared Synteny Analysis**

128 Sequencing data from 198 F1 specimens, including the parents, were used as the mapping  
129 population to anchor the scaffolds on to 24 **pseudo-chromosomes** of the *M. amblycephala* genome.  
130 Following RAD-Seq and sequencing protocol, 1883.5 Mb of 125-bp reads (on average 30.6 Mb  
131 and 9.3 Mb of read data for each parent and progeny, respectively) were generated on the HiSeq  
132 2500 next-generation sequencing platform. Based on the SOAP bioinformatic pipeline, we  
133 generated 5,317 SNP markers for constructing a high-resolution genetic map. The map spans  
134 1,701 cM with a mean marker distance of 0.33 cM and facilitated an anchoring of 1,434 scaffolds  
135 comprising 70% (779.54 Mb) of the *M. amblycephala* genome assembly to form 24 linkage  
136 groups (LG) (Additional file 1: Table S9). Of the anchored scaffolds, 598 could additionally be  
137 oriented (678.27 Mb, 87.01% of the total anchored sequences) (Figure 1A). A subsequent  
138 comparison of the gene order between *M. amblycephala* and its close relative *C. idellus* revealed  
139 607 large shared syntenic blocks encompassing 11,259 genes, and 190 chromosomal  
140 rearrangements. The values change to 1,062 regions, 13,152 genes and 279 rearrangements when  
141 considering *D. rerio*. The unexpected higher number of genes in syntenic regions shared with the  
142 more distantly related *D. rerio* is most likely an effect of the more complete genome assembly of  
143 this species compared to *C. idellus*. The rearrangement events are distributed across all *M.*  
144 *amblycephala* linkage groups without evidence for a local clustering (Figure 1B). The most

145 prominent event is a chromosomal fusion in *M. amblycephala* LG02 that joined two *D. rerio*  
146 chromosomes, Dre10 and Dre22. The same fusion is observed in *C. idellus* but not in *C. carpio*  
147 suggesting that it probably occurred in a last common ancestor of *M. amblycephala* and *C. idellus*,  
148 approximately 13.1 million years ago (Additional file 1: Figure S7).

## 149 **Results**

### 150 **Evolutionary Analysis**

151 A phylogenetic analysis of 316 single-copy genes with one to one orthologs in the genomes of 10  
152 other fish species, and coelacanth (*Latimeria chalumnae*) and elephant shark (*Callorhynchus milii*),  
153 as out group served as a basis for investigating the evolutionary trajectory of *M. amblycephala*  
154 (Figure 2A, Additional file 1: Figure S8). To illuminate the evolutionary process resulting in the  
155 adaptation to a grass diet, we analyzed the **functional categories of expanded genes** in the *M.*  
156 *amblycephala* and *C. idellus* lineage (Additional file 1: Figure S9, Additional file 2: Data Note1),  
157 two typical herbivores mainly feeding on aquatic and terrestrial grasses. Among the significantly  
158 over-represented KEGG pathways (Fisher's exact test,  $P < 0.01$ ), we find olfactory transduction  
159 (ko04740), immune-related pathways (ko04090, ko04672, ko04612 and ko04621), lipid metabolic  
160 related process (ko00590, ko03320, ko00591, ko00565, ko00592 and ko04975), as well as  
161 xenobiotics biodegradation and metabolism (ko00625 and ko00363) (Figure S10). Indeed, when  
162 tracing positively selected genes (PSG) in *M. amblycephala* and *C. idellus* (Additional file 3: Date  
163 Note2), **we identified 10 candidates involved in starch and sucrose metabolism (ko00500), in**  
164 **citrate cycle (ko00020) and in other types of O-glycan biosynthesis (ko00514). Moreover, 10**  
165 **genes encoding enzymes involved in lipid metabolism appear positively selected in both fish**  
166 **species (Additional file 1: Table S10).**

### 167 **Development of Intermuscular Bones**

168 To explain the genetic basis of IB, their formation and their function in cyprinids, we first  
169 analyzed the functional annotation of **genes that expanded** in this lineage (Figure 2C). Many of  
170 **these genes are involved in cell adhesion (GO: 0007155,  $P=5.26E-32$ , 357 genes), myosin**  
171 **complex (GO:0016459,  $P=2.74E-08$ , 100 genes) and cell-matrix adhesion (GO:0007160,**  
172  **$P=1.59E-21$ , 69 genes) (Figure 2C). As a second line of evidence, we performed transcriptome**

173 analyses of early developmental stages (stage1: whole larvae without IBs) and juvenile *M.*  
174 *amblycephala* (stage2: trunk muscle with partial IBs; stage3: trunk muscle with completed IBs)  
175 (Figure 3A). Compared with stage1, 388 and 651 differentially expressed genes (DEGs) are  
176 up-regulated in stage2 and stage3, respectively. And 249 of them are significantly up-regulated  
177 both in stage2 and stage3. KEGG analyses indicate many of these genes involved in tight junction  
178 (ko04530), regulation of actin cytoskeleton (ko04810), cardiac muscle contraction (ko04260) and  
179 vascular smooth muscle contraction (ko04270) (Additional file 1: Figure S11). Specifically, 26  
180 genes encoding proteins related to muscle contraction, including titin, troponin, myosin, actinin,  
181 calmodulin and other Ca<sup>2+</sup> transporting ATPases (Figure 3A) point to a strong remodeling of the  
182 musculature compartment. To confirm that the observed differences in gene expression are indeed  
183 linked to IB formation and function and are not simply due to the fact that different developmental  
184 stages were compared, we performed differential expression analysis of muscle tissues, IB, and  
185 connective tissues from the same six months old individual of *M. amblycephala* (Figure 3B,  
186 Additional file 1: Figure S12). 1,290 DEGs and 5,231 DEGs are significantly up-regulated in IB  
187 compared with connective tissues and muscle, respectively. 24 of these DEGs encode extracellular  
188 matrix (ECM) proteins (collagens and integrin-binding protein), Rho GTPase family (*RhoA*, *Rho*  
189 *GAP*, *Rac*, *Ras*), motor proteins (myosin, dynein, actin), and calcium channel regulation proteins  
190 (Additional file 1: Figure S13 and Table S11). In addition, GO annotations of 963 IB-specific  
191 genes indicative of abundance in protein binding (GO:0005515), calcium ion binding  
192 (GO:0005509), GTP binding (GO:0005525) and iron ion binding (GO:0005506) were found  
193 (Figure 3C).

194 During development of *M. amblycephala*, the first IB appears in muscles of caudal vertebrae  
195 as early as 28 days post fertilization (dpf) when body length is 12.95 mm (Additional file 1: Figure  
196 S14). The system then develops and ossifies predominantly from posterior to anterior (Additional  
197 file 1: Figure S15). IBs are present throughout the body within two months (Additional file 1:  
198 Figure S16) and develop into multiple morphological types in adults (Additional file 1: Figure  
199 S17). The bone is formed directly without an intermediate cartilaginous stage (Additional file 1:  
200 Figures S18 and S19). We also found a large number of mature osteoblasts distributed at the edge  
201 of the bone matrix while some osteocytes were apparent in the center of the mineralized bone

1  
2  
3  
4  
5  
6  
7  
8  
9  
10  
11  
12  
13  
14  
15  
16  
17  
18  
19  
20  
21  
22  
23  
24  
25  
26  
27  
28  
29  
30  
31  
32  
33  
34  
35  
36  
37  
38  
39  
40  
41  
42  
43  
44  
45  
46  
47  
48  
49  
50  
51  
52  
53  
54  
55  
56  
57  
58  
59  
60  
61  
62  
63  
64  
65

202 matrix (Additional file 1: Figures S20 and S21). These primary bone-forming cells predominantly  
203 regulate bone formation and function throughout life. Notably, among the genes up-regulated in  
204 IB, 35 bone formation regulatory genes were identified (shown in colored boxes in Figure 3D). In  
205 particular, genes involved in bone morphogenetic protein (BMP) signaling including *Bmp3*,  
206 *Smad8*, *Smad9*, and *Id2*, in fibroblast growth factor (FGF) signaling including *Fgf2*, *Fgfr1a*,  
207 *Fgfbp2*, *Col6a3*, and *Col4a5*, and in Ca<sup>2+</sup> channels including *Cacna1c*, *CaM*, *Creb5* and *Nfatc*  
208 were highly expressed (>2-fold change) in IB (Additional file 1: Figure S22).

### 209 **Adaptation to Herbivorous Diet**

210 Next to the presence of IB, the herbivory of *M. amblycephala* is the second key feature in  
211 connection to the use of this species as aquatic livestock. Olfaction, the sense of smell, is crucial  
212 for animals to find food. The perception of smell is mediated by a large gene family of olfactory  
213 receptor (OR) genes. In the *M. amblycephala* genome, we identified 179 functional olfactory  
214 receptor (OR) genes (Figure 4A), and based on the classification of Niimura [19], 158, 117 and  
215 153 receptors for water-borne odorants were identified in *M. amblycephala*, *C. idellus* and *D.*  
216 *rerio*, respectively (Additional file 1: Table S12). Overall, these receptor repertoires are  
217 substantially larger than those of other and carnivorous teleosts (*G. morhua*, *C. semilaevis*, *O.*  
218 *latipes*, *X. maculatus*) (Additional file 1: Figures S23 and S24, Table S12). In addition, we found  
219 a massive expansion of beta-type OR genes in the genomes of the herbivorous *M. amblycephala*  
220 and *C. idellus*, while very few exist in other teleosts (Figure 4B, Additional file 1: Table S12).

221 Taste is also an important factor in the development of dietary habits. Most animals can  
222 perceive five basic tastes, namely sourness, sweetness, bitterness, saltiness and umami [20]. *T1R1*,  
223 the receptor gene necessary for sensing umami, has been lost in herbivorous *M. amblycephala* but  
224 is duplicated in carnivorous *G. morhua*, *C. semilaevis* and omnivorous *O. latipes* and *X. maculatus*  
225 (Figures 4C and 4D, Additional file 1: Figures S25-26 and Table S13). In contrast, *T1R2*, the  
226 receptor gene for sensing sweet, has been duplicated in herbivorous *M. amblycephala* and *C.*  
227 *idellus*, omnivorous *C. carpio* and *D. rerio*, while it has been lost in carnivorous *G. morhua* and *C.*  
228 *semilaevis* (Additional file 1: Figure S27 and Table S13). Also the *T2R* gene family, most likely  
229 important in the course switching to a diet that contains a larger fraction of bitterness containing

230 food, has been expanded in *M. amblycephala*, *C. idellus*, *C. carpio* and *D. rerio* (Additional file 1:  
231 Figure S28).

232 To obtain further insights into the genetic adaptation to herbivorous diet, we focused on  
233 further genes that might be associated with digestion. Genes that encode proteases (including  
234 pepsin, trypsin, cathepsin and chymotrypsin) and amylases (including alpha-amylase and  
235 glucoamylase) were identified in the genomes of *M. amblycephala*, carnivorous *C. semilaevis*, *G.*  
236 *morhua* and omnivorous *D. rerio*, *O. latipes* and *X. maculatus*, indicating that herbivorous *M.*  
237 *amblycephala* has a protease repertoire that is not substantially different from those of carnivorous  
238 and omnivorous fishes (Additional file 1: Table S14). We did not identify any genes encoding  
239 potentially cellulose-degrading enzymes including endoglucanase, exoglucanase and  
240 beta-glucosidase in the genome of *M. amblycephala*, suggesting that utilization of the herbivorous  
241 diet may largely depend on the gut microbiome. To elucidate this further, we determined the  
242 composition of the gut microbial communities of juvenile, domestic, wild adult *M. amblycephala*  
243 and wild adult *C. idellus* using bacterial 16S rRNA sequencing. A total of 549,020 filtered high  
244 quality sequence reads from 12 samples were clustered at a similarity level of 97%. The resulting  
245 8,558 operational taxonomic units (OTUs) are dominated at phylum level by Proteobacteria,  
246 Fusobacteria, Bacteroidetes, Firmicutes and Actinobacteria (Additional file 1: Table S15, Figure  
247 4E). Increasing the resolution to the genus level, the composition and relative abundance of the  
248 gut microbiota of wild adult *M. amblycephala* and *C. idellus* are still very similar (Additional file  
249 1: Table S16) and we could identify more than 7% cellulose-degrading bacteria (Additional file 1:  
250 Table S17).

## 251 Discussion

252 The evolutionary trajectory analysis of *M. amblycephala* and other teleosts revealed that *M.*  
253 *amblycephala* has the closest relationship to *C. idellus*. Both the species are herbivorous fish but  
254 which endogenous and exogenous factors affected their feeding habits and how they adapted to  
255 their herbivorous diet is not known. Our results from the expanded genes and PSG in the lineage  
256 of the two herbivores uncovered a number of genes that are involved in glucose, lipid and  
257 xenobiotics metabolism, which would enhance the ability of an herbivore to detoxify the

1  
2  
3  
4  
5  
6  
7  
8  
9  
10  
11  
12  
13  
14  
15  
16  
17  
18  
19  
20  
21  
22  
23  
24  
25  
26  
27  
28  
29  
30  
31  
32  
33  
34  
35  
36  
37  
38  
39  
40  
41  
42  
43  
44  
45  
46  
47  
48  
49  
50  
51  
52  
53  
54  
55  
56  
57  
58  
59  
60  
61  
62  
63  
64  
65

258 secondary compounds present in grasses that are adverse or even toxic to the organism.  
259 Furthermore, the high-fiber but low-energy grass diet requires a highly effective intermediate  
260 metabolism that accelerates carbohydrate and lipid catabolism and conversion into energy to  
261 maintain physiological functions.

262 Olfaction and taste are also crucial for animals to find food and to distinguish whether  
263 potential food is edible or harmful [21, 22]. The ORs of teleosts are predominantly expressed in  
264 the main olfactory epithelium of the nasal cavity [21, 23] and can discriminate, like those of other  
265 vertebrates, different kinds of odor molecules. Previous studies have demonstrated that the beta  
266 type OR genes are present in both aquatic and terrestrial vertebrates, indicating that the  
267 corresponding receptors detect both water-soluble and airborne odorants [19, 21]. In the present  
268 study, the search for genes encoding OR showed that herbivorous *M. amblycephala* and *C. idellus*  
269 have a large number of beta-type OR, while other omnivorous and carnivorous fish only have one  
270 or two. This might be attributed to their particular herbivorous diet consisting not only of aquatic  
271 grasses but also the duckweed and terrestrial grasses, which they ingest from the water surface.

272 It is known that the receptor for umami is formed by the T1R1/T1R3 heterodimer, while  
273 T1R2/T1R3 senses sweet taste [24]. We found that the umami gene *TIR1* was lost in herbivorous  
274 *M. amblycephala* but duplicated in the carnivorous *G. morhua* and *C. Semilaevis*. The loss of the  
275 *TIR1* gene in *M. amblycephala* might exclude the expression of a functional umami taste receptor.  
276 Such situations in other organism, e.g. the Chinese panda, have previously been related to feeding  
277 specialization [25]. Bitterness sensed by the *T2R* is particularly crucial for animals to protect them  
278 from poisonous compounds [22]. Interestingly, the bitter receptor *T2R* genes are expanded in the  
279 herbivorous fish but few or no copy was found in carnivorous fish. These results not only indicate  
280 the genetic adaptation to herbivorous diet of *M. amblycephala*, but also provided a clear and  
281 comprehensive picture of adaptive evolutionary mechanisms of sensory systems in other fish  
282 species with different trophic specializations.

283 It has been reported that some insects such as *Tenebrio molitor* [26] and *Neotermes*  
284 *koshunensis* [27], and the mollusc *Corbicula japonica* [28] have genes encoding endogenous  
285 cellulose degradation-related enzymes. However, all so far analyzed herbivorous vertebrates lack  
286 these genes and always rely on their gut microbiome to digest food [25, 29]. In herbivorous *M.*



1  
2  
3  
4  
5  
6  
7  
8  
9  
10  
11  
12  
13  
14  
15  
16  
17  
18  
19  
20  
21  
22  
23  
24  
25  
26  
27  
28  
29  
30  
31  
32  
33  
34  
35  
36  
37  
38  
39  
40  
41  
42  
43  
44  
45  
46  
47  
48  
49  
50  
51  
52  
53  
54  
55  
56  
57  
58  
59  
60  
61  
62  
63  
64  
65

287 *amblycephala* and *C. idellus*, we also did not find any homologues of digestive cellulase genes.

288 Interestingly, our work on the composition of gut microbiota of the two fish species identifies  
289 more than 7% cellulose-degrading bacteria, suggesting that the cellulose degradation of  
290 herbivorous fish largely depend on their gut microbiome.

291 IB has evolved several times during teleost evolution [9, 30]. The developmental mechanisms  
292 and ossification processes forming IB are dramatically distinct from other bones such as ribs,  
293 skeleton, vertebrae or spines. These usually develop from cartilaginous bone and are derived from  
294 the mesenchymal cell population by endochondral ossification [31, 32]. However, IB form directly  
295 by intramembranous ossification and differentiate from osteoblasts within connective tissue,  
296 forming segmental, serially homologous ossifications in the myosepta. Although various methods  
297 of ossification of IB have been proposed, few experiments have been conducted to confirm the  
298 ossification process and little is known about the potential role of IB in teleosts. **Based on our  
299 findings of expanded genes in cyprinid lineage and evidence from transcriptome of developmental  
300 stages of IB formation, a number of genes were found to interact dynamically to mediate efficient  
301 cell motility, migration and muscle construction [33-36]. In addition, transcriptome analyses of  
302 three tissues indicated that ECM, Rho GTPase, motor and calcium channel regulation protein  
303 displayed high expression in IB. It is known that ECM proteins bound to integrins influence cell  
304 migration by actomyosin-generated contractile forces [34, 37]. Rho GTPases, acting as molecular  
305 switches, are also involved in regulating the actin cytoskeleton and cell migration, which in turn  
306 initiates intracellular signaling and contributes to tissue repair and regeneration [38-40]. Thus, our  
307 results provide molecular evidence that IB might play significant roles not only in regulating  
308 muscle contraction but also in active remodeling at the bone-muscle interface and coordination of  
309 cellular events.**

310 Some major developmental signals including BMP, FGF, WNT, together with  
311 calcium/calmodulin signaling [31, 41-43], are essential for regulating the differentiation and  
312 function of osteoblasts and osteocytes and for regulating the RANKL signaling pathway for  
313 osteoclasts [44]. In agreement with this concept, we found 35 bone formation regulatory genes  
314 involved in these signals were highly up-regulated in IB. **Among these signaling pathways, in  
315 particular, *Bmp*, *Fgf2*, and *Fgfr1* are closely related to intramembranous bone development and**



1  
2  
3  
4  
5  
6  
7  
8  
9  
10  
11  
12  
13  
14  
15  
16  
17  
18  
19  
20  
21  
22  
23  
24  
25  
26  
27  
28  
29  
30  
31  
32  
33  
34  
35  
36  
37  
38  
39  
40  
41  
42  
43  
44  
45  
46  
47  
48  
49  
50  
51  
52  
53  
54  
55  
56  
57  
58  
59  
60  
61  
62  
63  
64  
65

316 affect the expression and activity of other osteogenesis related transcription factors [31, 45]. The  
317 calcium-sensitive transcription factor *NFATc1* together with *CREB* induces the expression of  
318 osteoclast-specific genes [46]. Taken together, these results suggest that IB indeed undergoes an  
319 intramembranous ossification process, is regulated by bone-specific signaling pathways, and  
320 underlies a homeostasis of maintenance, repair and remodeling.

## 321 **Conclusions**

322 Our results provide novel functional insights into the evolution of cyprinids. Importantly, the *M.*  
323 *amblycephala* genome data come up with novel insights shedding light on the adaptation to  
324 herbivorous nutrition and evolution and formation of IB. Our results on the evolution of gene  
325 families, digestive and sensory system, as well as our microbiome meta-analysis and  
326 transcriptome data provide powerful evidence and a key database for future investigations to  
327 increase the understanding of the specific characteristics of *M. amblycephala* and other fish  
328 species.

## 329 **Methods**

### 330 **Sampling and DNA Extraction**

331 DNA for genome sequencing was derived from a double haploid fish from the *M. amblycephala*  
332 genetic breeding center at Huazhong Agricultural University (Wuhan, Hubei, China). Fish blood  
333 was collected from adult female fish caudal vein using sterile injectors with pre-added  
334 anticoagulant solutions following anesthetized with MS-222 and sterilization with 75% alcohol.  
335 Genomic DNA was extracted from the whole blood.

### 336 **Genomic Sequencing and Assembly**

337 Libraries with different insert sized inserts of 170 bp, 500 bp, 800 bp, 2 Kb, 5 Kb, 10 Kb and 20  
338 Kb were constructed from the genomic DNA at BGI-Shenzhen. The libraries were sequenced  
339 using a HiSeq2000 instrument. In total, 11 libraries, sequenced in 23 lanes were constructed. To  
340 obtain high quality data, we applied filtering criteria for the raw reads. As a result, 142.55 Gb of  
341 filtered data were used to complete the genome assembly using SOAPdenovo\_V2.04 [16]. Only  
342 filtered data were used in the genome assembly. First, the short insert size library data were used  
343 to construct a de Bruijn graph. The tips, merged bubbles and connections with low coverage were

1  
2  
3  
4  
5  
6  
7  
8  
9  
10  
11  
12  
13  
14  
15  
16  
17  
18  
19  
20  
21  
22  
23  
24  
25  
26  
27  
28  
29  
30  
31  
32  
33  
34  
35  
36  
37  
38  
39  
40  
41  
42  
43  
44  
45  
46  
47  
48  
49  
50  
51  
52  
53  
54  
55  
56  
57  
58  
59  
60  
61  
62  
63  
64  
65

344 removed before resolving the small repeats. Second, all high-quality reads were realigned with the  
345 contig sequences. The number of shared paired-end relationships between pairs of contigs was  
346 calculated and weighted with the rate of consistent and conflicting paired ends before constructing  
347 the scaffolds in a stepwise manner from the short-insert size paired ends to the long-insert size  
348 paired ends. Third, the gaps between the constructed scaffolds were composed mainly of repeats,  
349 which were masked during scaffold construction. These gaps were closed using the paired-end  
350 information to retrieve read pairs in which one end mapped to a unique contig and the other was  
351 located in the gap region. Subsequently, local assembly was conducted for these collected reads.  
352 To assess the genome assembly quality, approximately 42.82 Gb Illumina reads generated from  
353 short-insert size libraries were mapped onto the genome. Bwa0.5.9-r16 software [47] with default  
354 parameters was used to assess the mapping ratio and Soap coverage 2.27 was used to calculate the  
355 sequencing depth. We also assessed the accuracy of the genome assembly by Trinity [48],  
356 including number of ESTs and new mRNA reads from early stages of embryos and multiple  
357 tissues, by aligning the scaffolds to the assembled transcriptome sequences.

358 After obtaining K-mers from the short-insert-size (<1Kb) reads with just one bp slide,  
359 frequencies of each K-mer were calculated. The K-mer frequency fits Poisson distribution when a  
360 sufficient amount of data is present. The total genome size was deduced from these data in the  
361 following way: Genome size = K-mer num / Peak\_depth.

### 362 **Genome Annotation**

363 The genome was searched for repetitive elements using Tandem Repeats Finder (version 4.04)  
364 [49]. TEs were identified using homology-based approaches. The Repbase (version 16.10) [50]  
365 database of known repeats and a *de novo* repeat library generated by RepeatModeler were used.  
366 This database was mapped using the software of RepeatMasker (version 3.3.0). Four types of  
367 non-coding RNAs (microRNAs, transfer RNAs, ribosomal RNAs and small nuclear RNAs) were  
368 also annotated using tRNAscan-SE (version 1.23) and the Rfam database45 (Release 9.1) [51].

369 For gene prediction, *de novo* gene prediction, homology-based methods and RNA-seq data  
370 were used to perform gene prediction. For the sequence similarity based prediction, *D. rerio*, *G.*  
371 *aculeatus*, *O. niloticus*, *O. latipes* and *G. morhua* protein sequences were downloaded from  
372 Ensembl (release 73) and were aligned to the *M. amblycephala* genome using TBLASTN. Then

1  
2  
3  
4  
5  
6  
7  
8  
9  
10  
11  
12  
13  
14  
15  
16  
17  
18  
19  
20  
21  
22  
23  
24  
25  
26  
27  
28  
29  
30  
31  
32  
33  
34  
35  
36  
37  
38  
39  
40  
41  
42  
43  
44  
45  
46  
47  
48  
49  
50  
51  
52  
53  
54  
55  
56  
57  
58  
59  
60  
61  
62  
63  
64  
65

373 homologous genome sequences were aligned against the matching proteins using GeneWise [52]  
374 to define gene models. Augustus was employed to predict coding genes using appropriate  
375 parameters in *de novo* prediction. For the RNA-seq based prediction, we mapped transcriptome  
376 reads to the genome assembly using TopHat [53]. Then, we combined TopHat mapping results  
377 together and applied Cufflinks [54] to predict transcript structures. All predicted gene structures  
378 were integrated by GLEAN [55] (<http://sourceforge.net/projects/glean-gene/>) to obtain a  
379 consensus gene set. Gene functions were assigned to the translated protein-coding genes using  
380 Blastp tool, based on their highest match to proteins in the SwissProt and TrEMBL [56] databases  
381 (Uniprot release 2011-01). Motifs and domains in the protein-coding genes were determined by  
382 InterProScan (version 4.7) searches against six different protein databases: ProDom, PRINTS,  
383 Pfam, SMART, PANTHER and PROSITE. Gene Ontology [57] IDs for each gene were obtained  
384 from the corresponding InterPro entries. All genes were aligned against KEGG [58] (Release 58)  
385 database, and the pathway in which the gene might be involved was derived from the matched  
386 genes in KEGG. tRNA genes were *de novo* predicted by tRNAscan-SE software [59], with  
387 eukaryote parameters on the repeat pre-masked genome. The rRNA fragments were identified by  
388 aligning the rRNA sequences using BlastN at E-value 1e-5. The snRNA and miRNA were  
389 searched by the method of aligning and searching with INFERNAL (version 0.81) [60] against  
390 Rfam database (release 9.1).

### 391 **Genetic Map Construction**

392 To anchor the scaffolds into pseudo-chromosomes, 198 F1 population individuals were used to  
393 obtain the genetic map. Each of the individual genomic DNA was digested with the restriction  
394 endonuclease EcoR I, following the RAD-Seq protocol [61]. The SNP calling process was carried  
395 out using the SOAP bioinformatic pipeline. The RAD-based SNP calling was done by SOAPSnp  
396 software [62] after each individual's paired-end RAD reads was mapped onto the assembled  
397 reference genome with the alignment software SOAP2 [63]. The potential SNP markers were used  
398 for the linkage analysis if the following criteria were satisfied: for parents - sequencing depth  $\geq 8$   
399 and  $\leq 100$ , base quality  $\geq 25$ , copy number  $\leq 1.5$ ; for progeny - sequencing depth  $\geq 5$ , base quality  
400  $\geq 20$ , copy number  $\leq 1.5$ . If the markers were showing significantly distorted segregation (*P*-value  
401  $< 0.01$ ), they were excluded from the map construction. Linkage analysis was performed only for

1  
2  
3  
4  
5  
6  
7  
8  
9  
10  
11  
12  
13  
14  
15  
16  
17  
18  
19  
20  
21  
22  
23  
24  
25  
26  
27  
28  
29  
30  
31  
32  
33  
34  
35  
36  
37  
38  
39  
40  
41  
42  
43  
44  
45  
46  
47  
48  
49  
50  
51  
52  
53  
54  
55  
56  
57  
58  
59  
60  
61  
62  
63  
64  
65

402 markers present in at least 80% of the genomes, using JoinMap 4.0 software with CP population  
403 type codes and applying the double pseudo-test cross strategy [64]. The linkage groups were  
404 formed at a logarithm of odds threshold of 6.0 and ordered using the regression mapping  
405 algorithm.

#### 406 **Construction of Gene Families**

407 We identified gene families using TreeFam software [65] as follows: Blast was used to compare  
408 all the protein sequences from 13 species: *M. amblycephala*, *C. idellus*, *C. semilaevis*, *C. carpio*,  
409 *D. rerio*, *Callorhinchus milii*, *G. morhua*, *G. aculeatus*, *Latimeria chalumnae*, *Oncorhynchus*  
410 *mykiss*, *O. niloticus*, *O. latipes*, *Fugu rubripes*, with the E-value threshold set as 1e-7. In the next  
411 step, HSP segments of each protein pair were concatenated by Solar software. H-scores were  
412 computed based on Bit-scores and these were taken to evaluate the similarity among genes.  
413 Finally, gene families were obtained by clustering of homologous gene sequences using  
414 Hcluster\_sg (Version 0.5.0). Specific genes of *M. amblycephala* were those that did not cluster  
415 with other vertebrates that were chosen for gene family construction, and those that did not have  
416 homologs in the predicted gene repertoire of the compared genomes. If these genes had functional  
417 motifs, they were annotated by GO.

#### 418 **Phylogenetic Tree Reconstruction and Divergence Time Estimation**

419 The coding sequences of single-copy gene families conserved among *M. amblycephala*, *C. idellus*,  
420 *C. carpio*, *D. rerio*, *C. semilaevis*, *G. morhua*, *G. aculeatus*, *Latimeria chalumnae*, *O. mykiss*, *O.*  
421 *niloticus*, *O. latipes*, *C. milii* and *Fugu rubripes* (Ensembl Gene v.77) were extracted and aligned  
422 with guidance from amino-acid alignments created by the MUSCLE program [66]. The individual  
423 sequence alignments were then concatenated to form one supermatrix. PhyML [67, 68] was  
424 applied to construct the phylogenetic tree under an HKY85+gamma model for nucleotide  
425 sequences. ALRT values were taken to assess the branch reliability in PhyML. The same set of  
426 codon sequences at position 2 was used for phylogenetic tree construction and estimation of the  
427 divergence time. The PAML mcmctree program (PAML version 4.5) [69, 70] was used to  
428 determine divergence times with the approximate likelihood calculation method and the correlated  
429 molecular clock and REV substitution model.

#### 430 **Gene Family Expansion and Contraction Analyses**

1  
2  
3  
4  
5  
6  
7  
8  
9  
10  
11  
12  
13  
14  
15  
16  
17  
18  
19  
20  
21  
22  
23  
24  
25  
26  
27  
28  
29  
30  
31  
32  
33  
34  
35  
36  
37  
38  
39  
40  
41  
42  
43  
44  
45  
46  
47  
48  
49  
50  
51  
52  
53  
54  
55  
56  
57  
58  
59  
60  
61  
62  
63  
64  
65

431 Protein sequences of *M. amblycephala* and 11 other related species (Ensembl Gene v.77)) were  
432 used in BLAST searches to identify homologs. We identified gene families using CAFÉ [71],  
433 which employs a random birth and death model to study gene gains and losses in gene families  
434 across a user-specified phylogeny. The global parameter  $\lambda$ , which describes both the gene birth ( $\lambda$ )  
435 and death ( $\mu = -\lambda$ ) rate across all branches in the tree for all gene families, was estimated using  
436 maximum likelihood. A conditional *P*-value was calculated for each gene family, and families  
437 with conditional *P*-values less than the threshold (0.05) were considered as having notable gain or  
438 loss. We identified branches responsible for low overall *P*-values of significant families.

### 439 **Detection of Positively Selected Genes**

440 We calculated Ka/Ks ratios for all single copy orthologs of *M. amblycephala* and *C. semilaevis*, *D.*  
441 *rerio*, *G. morhua*, *O. niloticus* and *C. carpio*. Alignment quality was essential for estimating  
442 positive selection. Thus, orthologous genes were first aligned by PRANK [72], which is  
443 considerably conservative for inferring positive selection. We used Gblocks [73] to remove  
444 ambiguously aligned blocks within PRANK alignments and employed ‘codeml’ in the PAML  
445 package with the free-ratio model to estimate Ka, Ks, and Ka/Ks ratios on different branches. The  
446 differences in mean Ka/Ks ratios for single-copy genes between *M. amblycephala* and each of the  
447 other species were compared using paired Wilcoxon rank sum tests. Genes that showed values of  
448 Ka/Ks higher than 1 along the branch leading to *M. amblycephala* were reanalyzed using the  
449 codon based branch-site tests implemented in PAML. The branch-site model allowed  $\omega$  to vary  
450 both among sites in the protein and across branches, and was used to detect episodic positive  
451 selection.

### 452 **Developmental Process of Intermuscular Bone in *M. amblycephala***

453 To better understand the number and morphological types of IBs in adult *M. amblycephala*,  
454 specimens with a body length ranging from 15.5 to 20.5 cm were collected and each individual  
455 was wrapped in gauze and boiled. The fish body was divided into two sections: anterior (snout to  
456 cloaca) and posterior (cloaca to the base of caudal fin), and the length of each section was  
457 measured. The IBs were retrieved, counted, arranged in order and photographed with a digital  
458 camera. Fertilized *M. amblycephala* eggs were brought from hatching facilities at Freshwater Fish  
459 Genetics Breeding Center of Huazhong Agricultural University (Wuhan, Hubei, China) to our

1  
2  
3  
4  
5  
6  
7  
8  
9  
10  
11  
12  
13  
14  
15  
16  
17  
18  
19  
20  
21  
22  
23  
24  
25  
26  
27  
28  
29  
30  
31  
32  
33  
34  
35  
460 laboratory. *M. amblycephala* larvae were maintained in a re-circulating aquaculture system at 23 ±  
461 1°C with a 14-hr photoperiod. To explore the early development of IBs, larvae at different stages  
462 from 15 to 40 dpf were collected and fixed in 4% paraformaldehyde and transferred to 70%  
463 ethanol for storage. Specimens were stained with alizarin red for bone following the method  
464 described by Dawson [74]. The appearance of red color was recorded as the appearance of IB  
465 because bone ossification is accompanied by the uptake of alizarin red, resulting in red staining of  
466 the mineralized bone matrix. Myosepta, either not yet ossified, or poorly ossified, are not visible  
467 with alizarin red staining. For histologic analysis, specimens were paraffin-embedded and  
468 sectioned following standard protocols. Sections were stained with hematoxylin and eosin (HE)  
469 and Masson trichrome [75] and photographed using a Nikon microscope (Nikon, Tokyo, Japan)  
470 with a DP70 digital camera (Olympus, Japan). Scanning electron microscopy (SEM) and  
471 transmission electron microscopy (TEM) were also conducted to analyze the ultrastructure of IB.  
472 The specimens were fixed with 2.5% (v/v) glutaraldehyde in a solution of 0.1 M sodium  
473 cacodylate buffer (pH 7.3) for 2 h at room temperature. The SEM and TEM samples were  
474 prepared according to a standard protocol described by Ott [76]. The samples were then visualized  
475 with a JSM-6390LV scanning electron microscope (SEM, Japan) and the stained ultrathin sections  
476 with a H-7650 transmission electron microscope (Hitachi, Japan).

### 477 **RNA Sequencing Analysis**

37  
38  
39  
40  
41  
42  
43  
44  
45  
46  
47  
48  
49  
50  
51  
52  
53  
54  
55  
56  
57  
58  
59  
60  
61  
62  
63  
64  
65  
478 *M. amblycephala* specimens belonging to three different developmental stages of IBs (stage 1: whole  
479 larvae without distribution of IB; stage 2: muscle tissues with partial distribution of IBs; stage 3:  
480 muscle tissues with completed distribution of IBs) were identified under microscope and immediately  
481 frozen in liquid nitrogen. In addition, dorsal white muscle, IBs and connective tissue surrounding the  
482 IBs from six months old fish were also collected. RNA was extracted from total fish samples at  
483 different stages and from individual muscle, connective tissue, and intermuscular bone samples of  
484 *M. amblycephala* using RNAisoPlus Reagent (TaKaRa, China) according to the manufacturer's  
485 protocol. The integrity and purity of the RNA was determined by gel electrophoresis and Agilent  
486 2100 BioAnalyzer (Agilent, USA) before preparing the libraries for sequencing. Paired-end RNA  
487 sequencing was performed using the Illumina HiSeq 2000 platform. Low quality score reads were  
488 filtered and the clean data were aligned to the reference genome using Bowtie [77]. Genes and

1  
2  
3  
4  
5  
6  
7  
8  
9  
10  
11  
12  
13  
14  
15  
16  
17  
18  
19  
20  
21  
22  
23  
24  
25  
26  
27  
28  
29  
30  
31  
32  
33  
34  
35  
36  
37  
38  
39  
40  
41  
42  
43  
44  
45  
46  
47  
48  
49  
50  
51  
52  
53  
54  
55  
56  
57  
58  
59  
60  
61  
62  
63  
64  
65

489 isoforms expression level were quantified by a software package: RSEM (RNASeq by  
490 Expectation Maximization) [78]. Gene expression levels were calculated by using the RPKM  
491 method (Reads per kilobase transcriptome per million mapped reads) [79] and adjusted by a  
492 scaling normalization method [80]. We detected DEGs from three stages of IBs with software  
493 NOIseq and three different tissues with PossionDis as requested. NOIseq is based on noisy  
494 distribution model, performed as described by Tarazona [81]. The parameters were set as: fold  
495 change  $\geq 2.00$  and probability  $\geq 0.7$ . PossionDis is based on the Poisson distribution, performed  
496 as described by Audic [82]. The parameters were set as: fold change  $\geq 2.00$  and FDR  $\leq 0.001$ .  
497 Annotation of DEGs were mapped to GO categories in the database  
498 (<http://www.geneontology.org/>) and the number of genes for every term were calculated to  
499 identify GO terms that were significantly enriched in the input list of DEGs. The calculated  
500 *P*-value was adjusted by the Bonferroni Correction, taking corrected *P*-value  $\leq 0.05$  as a threshold.  
501 KEGG automatic annotation was used to perform pathway enrichment analysis of DEGs.

#### 502 **Prediction of Olfactory Receptor Genes**

503 Olfactory receptor genes were identified by previously described methods [83], with the exception  
504 of a first-round TBLASTN [84] search, in which 1,417 functional olfactory receptor genes from *H.*  
505 *sapiens*, *D. rerio*, *L. chalumnae*, *Lepisosteus oculatus*, *L. vexillifer*, *O. niloticus*, *O. latipes*, *F.*  
506 *rubripes* and *Xenopus tropicalis* were used as queries. We then predicted the structure of  
507 sequenced genes using the blast-hit sequence with the software GeneWise extending in both 3' and  
508 5' directions along the genome sequences. The results were further confirmed by NR annotation.  
509 Then the coding sequences from the start (ATG) to stop codons were extracted, while sequences  
510 that contained interrupting stop codons or frame-shifts were regarded as pseudogenes. To  
511 construct phylogenetic trees, the amino-acid sequences encoded by olfactory receptor genes were  
512 first aligned using the program MUSCLE nested in MEGA 5.10 [85]. We then constructed the  
513 phylogenetic tree using the neighbor-joining method with Poisson correction distances using the  
514 program MEGA 5.10. We also identified and compared the genes for five basic tastes (sour, sweet,  
515 bitter, umami and salty) using a similar method as in OR gene identification.

#### 516 **Gut Microbiota Analysis**

517 To characterize the microbial diversity of herbivorous *M. amblycephala*, a total of 12 juvenile

1  
2  
3  
4  
5  
6  
7  
8  
9  
10  
11  
12  
13  
14  
15  
16  
17  
18  
19  
20  
21  
22  
23  
24  
25  
26  
27  
28  
29  
30  
31  
32  
33  
34  
35  
36  
37  
38  
39  
40  
41  
42  
43  
44  
45  
46  
47  
48  
49  
50  
51  
52  
53  
54  
55  
56  
57  
58  
59  
60  
61  
62  
63  
64  
65

518 (LBSB), domestic adult (DBSB), wild adult *M. amblycephala* (BSB) and wild adult *C. idellus*  
519 (GC) intestinal fecal samples were collected. Bacterial genomic DNA was extracted from 200 mg  
520 gut content of each sample using a QIAamp DNA Stool Mini Kit (Qiagen, Valencia, USA).  
521 Quality and integrity of each DNA sample were determined by 1% agarose gel electrophoresis in  
522 Tris-acetate-EDTA (TAE) buffer. DNA concentration was quantified using NanoDrop ND-2000  
523 spectrophotometer (Thermo Scientific). To determine the diversity and composition of the  
524 bacterial communities of each sample, a total of 20 µg of genomic DNA were sequenced using the  
525 Illumina MiSeq sequencing platform. PCR amplifications were conducted from each sample to  
526 produce the V4 hypervariable region (515F and 806 R) of the 16S rRNA gene according to the  
527 previously described method [86]. We used the UPARSE pipeline [87] to pick operational  
528 taxonomic units (OTUs) at an identity threshold of 97% and picked representative sequences for  
529 each OTU and used the RDP classifier to assign taxonomic data to each representative sequence.

### 530 **Additional files**

531 Additional file 1: Tables S1 to S17 and Figures S1 to S28.

532 Additional file 2: Data Note1 Expanded genes in the *M. amblycephala* and *C. idellus* lineage.

533 Additional file 3: Data Note2 Positively selected genes in the *M. amblycephala* and *C. idellus*  
534 genomes.

### 535 **Abbreviations**

536 IB, intermuscular bone; SNP, single-nucleotide polymorphism; BUSCO, benchmarking universal  
537 single-copy orthologs; TE, transposable element; LTR, long terminal repeat retrotransposon; LG,  
538 linkage group; PSG, positively selected gene; ECM, extracellular matrix; dpf, days post  
539 fertilization; BMP, bone morphogenetic protein; FGF, fibroblast growth factor; OR, olfactory  
540 receptor; OTU, operational taxonomic unit; DEGs, differentially expressed genes; HE,  
541 hematoxylin and eosin; SEM, scanning electron microscopy; TEM, transmission electron  
542 microscopy

### 543 **Acknowledgements**

544 This work was supported by the Fundament Research Funds for the Central Universities  
545 (2662015PY019), the Modern Agriculture Industry Technology System Construction Projects of



1  
2  
3  
4  
5  
6  
7  
8  
9  
10  
11  
12  
13  
14  
15  
16  
17  
18  
19  
20  
21  
22  
23  
24  
25  
26  
27  
28  
29  
30  
31  
32  
33  
34  
35  
36  
37  
38  
39  
40  
41  
42  
43  
44  
45  
46  
47  
48  
49  
50  
51  
52  
53  
54  
55  
56  
57  
58  
59  
60  
61  
62  
63  
64  
65

546 China titled as—Staple Freshwater Fishes Industry Technology System (No. CARS-46-05),  
547 Guangdong Haid Group Co., Ltd and the International Scientific and Technology Cooperation  
548 Program of Wuhan City (2015030809020365).

### 549 **Availability of data and materials**

550 Datasets supporting the results of this article are available in the GigaDB repository associated  
551 with this publication [88]. Raw whole genome sequencing, transcriptome and RAD-Seq data have  
552 been deposited at NCBI in the SRA under [BioProject](#) number PRJNA343584.

### 553 **Authors' contributions**

554 W.W. initiated and conceived the project and provided scientific input. X.Q. organized financial  
555 support and designed the project. M.S. discussed the data, wrote and modified the paper. H.L. and  
556 C.C. conducted the biological experiments, analyzed the data and wrote the paper with input from  
557 other authors. I.E. wrote and modified the manuscript and discussed the data. The RAD-Seq data  
558 analyses and the genetic map construction were performed by Z.G., Y.G., J.J. and X.J. Genome  
559 assembly and annotation were performed by J.M., H.C., M.X. and J.C. X.Z., W.L., R.L., B.C.,  
560 J.W., H.L., S.Y., H.W., X.C., X.Z., Y.Z., K.W., R.Y. and B. L. carried out the samples preparation  
561 and data collection. J.L. and J.C. identified the gene families and analyzed the RNA-seq data. M.B.  
562 coordinated the project. S.Z. and X.F. modified the manuscript and discussed the data. All authors  
563 read the manuscript and provided comments and suggestions for improvements. The authors  
564 declare no competing financial interests.

### 565 **Competing interests**

566 The authors declare that they have no competing interests.

### 567 **Ethics approval and consent to participate**

568 All experimental procedures involving fish were performed in accordance with the guidelines and  
569 regulations of the National Institute of Health Guide for the Care and Use of Laboratory Animals  
570 and the Institutional Review Board on Bioethics and Biosafety of BGI (BGI-IRB).

### 571 **References**

- 1  
2  
3  
4  
5  
6  
7  
8  
9  
10  
11  
12  
13  
14  
15  
16  
17  
18  
19  
20  
21  
22  
23  
24  
25  
26  
27  
28  
29  
30  
31  
32  
33  
34  
35  
36  
37  
38  
39  
40  
41  
42  
43  
44  
45  
46  
47  
48  
49  
50  
51  
52  
53  
54  
55  
56  
57  
58  
59  
60  
61  
62  
63  
64  
65
- 572 1. FAO Fisheries and Aquaculture Department. FAO yearbook Fishery and Aquaculture Statistics  
573 2014 (Food and Agriculture Organization of the United Nations, Rome, 2016).
  - 574 2. Star B, Nederbragt AJ, Jentoft S, Grimholt U, Malmstrøm M, Gregers TF, et al. The genome  
575 sequence of Atlantic cod reveals a unique immune system. *Nature*. 2011; 477:207–10.
  - 576 3. Berthelot C, Brunet F, Chalopin D, Juanchich A, Bernard M, Noël B, et al. The rainbow trout  
577 genome provides novel insights into evolution after whole-genome duplication in vertebrates.  
578 *Nat. Commun.* 2014; 5:3657.
  - 579 4. Tine M., Kuhl H., Gagnaire PA, Louro B, Desmarais E, Martins RS, et al. European sea bass  
580 genome and its variation provide insights into adaptation to euryhalinity and speciation. *Nat.*  
581 *Commun.* 2014; 5:5770.
  - 582 5. Wu C, Zhang D, Kan M, Lv Z, Zhu A, Su Y, et al. The draft genome of the large yellow  
583 croaker reveals well-developed innate immunity. *Nat. Commun.* 2014; 5:5227.
  - 584 6. Chen S, Zhang G, Shao C, Huang Q, Liu G, Zhang P, et al. Whole-genome sequence of a  
585 flatfish provides insights into ZW sex chromosome evolution and adaptation to a benthic  
586 lifestyle. *Nat. Genet.* 2014; 46:253–60.
  - 587 7. Brawand D, Wagner CE, Li YI, Malinsky M, Keller I, Fan S, et al. The genomic substrate for  
588 adaptive radiation in African cichlid fish. *Nature*. 2014; 513:375–82.
  - 589 8. Chen X, Zhong L, Bian C, Xu P, Qiu Y, You X, et al. High-quality genome assembly of  
590 channel catfish, *Ictalurus punctatus*. *GigaScience*. 2016; 5:39.
  - 591 9. Gemballa S, Britz R. Homology of intermuscular bones in acanthomorph fishes. *Am. Mus.*  
592 *Novit.* 1998; 3241:1–25.
  - 593 10. Danos N, Ward AB. The homology and origins of intermuscular bones in fishes: Phylogenetic  
594 or biomechanical determinants? *Biol. J. Linn. Soc.* 2012; 106:607–22.
  - 595 11. Wan SM, Yi SK, Zhong J, Nie CH, Guan NN, Zhang WZ, et al. Dynamic mRNA and miRNA  
596 expression analysis in response to intermuscular bone development of blunt snout bream  
597 (*Megalobrama amblycephala*). *Sci. Rep.* 2016; 6:31050.
  - 598 12. Xu P, Zhang X, Wang X, Li J, Liu G, Kuang Y, et al. Genome sequence and genetic diversity  
599 of the common carp, *Cyprinus carpio*. *Nat. Genet.* 2014; 46:1212–9.
  - 600 13. Wang Y, Lu Y, Zhang Y, Ning Z, Li Y, Zhao Q, et al. The draft genome of the grass carp  
601 (*Ctenopharyngodon idellus*) provides insights into its evolution and vegetarian adaptation.  
602 *Nat. Genet.* 2015; 47:625–31.
  - 603 14. Gao Z, Luo W, Liu H, Zeng C, Liu X, Yi S, et al. Transcriptome analysis and SSR/SNP  
604 markers information of the blunt snout bream (*Megalobrama amblycephala*). *PLoS One.*  
605 2012; 7:e42637.

- 606 15. Yi S, Gao ZX, Zhao H, Zeng C, Luo W, Chen B, et al. Identification and characterization of  
607 microRNAs involved in growth of blunt snout bream (*Megalobrama amblycephala*) by  
608 Solexa sequencing. BMC Genomics. 2013; 14:754.
- 609 16. Luo R, Liu B, Xie Y, Li Z, Huang W, Yuan J, et al. SOAPdenovo2: an empirically improved  
610 memory-efficient short-read de novo assembler. Gigascience. 2012;1:18.
- 611 17. Simao FA, Waterhouse RM, Ioannidis P, Kriventseva EV, Zdobnov EM. BUSCO: assessing  
612 genome assembly and annotation completeness with single-copy orthologs. Bioinformatics.  
613 2015;31:3210–2.
- 614 18. Jones FC, Grabherr MG, Chan YF, Russell P, Mauceli E, Johnson J, et al. The genomic basis  
615 of adaptive evolution in threespine sticklebacks. Nature. 2012; 484:55–61.
- 616 19. Niimura Y. On the origin and evolution of vertebrate olfactory receptor genes: comparative  
617 genome analysis among 23 chordate species. Genome Biol. Evol. 2009; 1:34–44.
- 618 20. Lindemann B. Receptors and transduction in taste. Nature. 2001; 413:219–25.
- 619 21. Nei M, Niimura Y, Nozawa M. The evolution of animal chemosensory receptor gene  
620 repertoires: roles of chance and necessity. Nat. Rev. Genet. 2008; 9:951–63.
- 621 22. Chandrashekar J, Mueller KL, Hoon MA, Adler E, Feng L, Guo W, et al. T2Rs function as  
622 bitter taste receptors. Cell. 2000; 100:703–11.
- 623 23. Niimura Y, Nei M. Evolutionary dynamics of olfactory and other chemosensory receptor  
624 genes in vertebrates. J. Hum. Genet. 2006; 51:505–17.
- 625 24. Nelson G, Chandrashekar J, Hoon MA, Feng L, Zhao G, Ryba NJ, et al. An amino-acid taste  
626 receptor. Nature. 2002; 416:199–202.
- 627 25. Li R, Fan W, Tian G, Zhu H, He L, Cai J, et al. The sequence and *de novo* assembly of the  
628 giant panda genome. Nature. 2010; 463:311–7.
- 629 26. Ferreira AHP, Marana SR, Terra WR, Ferreira C. Purification, molecular cloning, and  
630 properties of a  $\beta$ -glycosidase isolated from midgut lumen of *Tenebrio molitor* (Coleoptera)  
631 larvae. Insect Biochem. Mol. Biol. 2001; 31:1065–76.
- 632 27. Tokuda G, Saito H, Watanabe H. A digestive  $\beta$ -glucosidase from the salivary glands of the  
633 termite, *Neotermes koshunensis* (Shiraki): Distribution, characterization and isolation of its  
634 precursor cDNA by 5'- and 3'-RACE amplifications with degenerate primers. Insect  
635 Biochem. Mol. Biol. 2002; 32:1681–9.
- 636 28. Sakamoto K, Uji S, Kurokawa T, Toyohara H. Molecular cloning of endogenous  
637  $\beta$ -glucosidase from common Japanese brackish water clam *Corbicula japonica*. Gene. 2009;  
638 435:72–9.
- 639 29. Zhu L, Wu Q, Dai J, Zhang S, Wei F. Evidence of cellulose metabolism by the giant panda gut

- 640 microbiome. Proc. Natl. Acad. Sci. USA. 2011; 108:17714–9.
- 641 30. Bird NC, Mabee PM. Developmental morphology of the axial skeleton of the zebrafish, *Danio*  
642 *rerio* (Ostariophysi: Cyprinidae). Dev. Dyn. 2003; 228:337–57.
- 643 31. Ornitz D, Marie P. FGF signaling pathways in endochondral and intramembranous bone  
644 development and human genetic disease. Genes Dev. 2002; 16:1446–65.
- 645 32. Ortega N, Behonick DJ, Werb Z. Matrix remodeling during endochondral ossification. Trends  
646 Cell Biol. 2004; 14:86–93.
- 647 33. Even-Ram S, Doyle AD, Conti MA, Matsumoto K, Adelstein RS, Yamada KM. Myosin IIA  
648 regulates cell motility and actomyosin-microtubule crosstalk. Nat. Cell Biol. 2007;  
649 9:299–309.
- 650 34. Sheetz MP, Felsenfeld DP, Galbraith CG. Cell migration: Regulation of force on  
651 extracellular-complexes. Trends Cell Biol. 1998; 8:51–4.
- 652 35. Gunst SJ, Zhang W. Actin cytoskeletal dynamics in smooth muscle: a new paradigm for the  
653 regulation of smooth muscle contraction. Am. J. Physiol. Cell Physiol. 2008; 295:C576–87.
- 654 36. Webb RC. Smooth muscle contraction and relaxation. Adv. Physiol. Educ. 2003; 27:201–6.
- 655 37. Ulrich TA, De Juan Pardo EM, Kumar S. The mechanical rigidity of the extracellular matrix  
656 regulates the structure, motility, and proliferation of glioma cells. Cancer Res. 2009;  
657 69:4167–74.
- 658 38. Ridley AJ. Rho GTPases and cell migration. J. Cell Sci. 2001; 114:2713–22.
- 659 39. Etienne-Manneville S, Hall A. Rho GTPases in Cell Biology. Nature. 2002; 420:629–35.
- 660 40. Ridley AJ. Cell Migration: Integrating Signals from Front to Back. Science. 2003;  
661 302:1704–9.
- 662 41. Chen G, Deng C, Li YP. TGF- $\beta$  and BMP signaling in osteoblast differentiation and bone  
663 formation. Int. J. Biol. Sci. 2012; 8:272–88.
- 664 42. Harada S, Rodan GA. Control of osteoblast function and regulation of bone mass. Nature.  
665 2003; 423:349–55.
- 666 43. Long F. Building strong bones: molecular regulation of the osteoblast lineage. Nat. Rev. Mol.  
667 Cell Biol. 2011; 13:27–38.
- 668 44. Boyle WJ, Simonet WS, Lacey DL. Osteoclast differentiation and activation. Nature. 2003;  
669 423:337–42.
- 670 45. Fakhry A, Ratisoontorn C, Vedhachalam C, Salhab I, Koyama E, Leboy P, et al. Effects of  
671 FGF-2/-9 in calvarial bone cell cultures: Differentiation stage-dependent mitogenic effect,  
672 inverse regulation of BMP-2 and noggin, and enhancement of osteogenic potential. Bone.

673 2005; 36:254–66.

674 46. Sato K, Suematsu A, Nakashima T, Takemoto-Kimura S, Aoki K, Morishita Y, et al.  
675 Regulation of osteoclast differentiation and function by the CaMK-CREB pathway. *Nat. Med.*  
676 2006; 12:1410–6.

677 47. Li H, Durbin R. Fast and accurate short read alignment with Burrows-Wheeler transform.  
678 *Bioinformatics.* 2009; 25:1754–60.

679 48. Grabherr MG, Haas BJ, Yassour M, Levin JZ, Thompson DA, Amit I, et al. Trinity:  
680 reconstructing a full-length transcriptome without a genome from RNA-Seq data . *Nat.*  
681 *Biotechnol.* 2011; 29:644–52.

682 49. Benson G. Tandem repeats finder: A program to analyze DNA sequences. *Nucleic Acids Res.*  
683 1999; 27:573–80.

684 50. Jurka J, Kapitonov VV, Pavlicek A, Klonowski P, Kohany O, Walichiewicz J. Repbase  
685 Update, a database of eukaryotic repetitive elements. *Cytogenet. Genome Res.* 2005;  
686 110:462–7.

687 51. Griffiths-Jones S, Moxon S, Marshall M, Khanna A, Eddy SR, Bateman A. Rfam: Annotating  
688 non-coding RNAs in complete genomes. *Nucleic Acids Res.* 2005; 33:121–4.

689 52. Birney E, Clamp M, Durbin R. GeneWise and Genomewise. *Genome Res.* 2004; 14:988–95.

690 53. Trapnell C, Pachter L, Salzberg SL. TopHat: Discovering splice junctions with RNA-Seq.  
691 *Bioinformatics.* 2009; 25:1105–11.

692 54. Trapnell C, Williams BA, Pertea G, Mortazavi A, Kwan G, Van Baren MJ, et al. Transcript  
693 assembly and quantification by RNA-Seq reveals unannotated transcripts and isoform  
694 switching during cell differentiation. *Nat. Biotechnol.* 2010; 28:511–5.

695 55. Elsik CG, Mackey AJ, Reese JT, Milshina NV, Roos DS, Weinstock GM. Creating a honey  
696 bee consensus gene set. *Genome Biol.* 2007; 8:R13.

697 56. Bairoch A, Apweiler R. The SWISS-PROT protein sequence database and its supplement  
698 TrEMBL in 2000. *Nucleic Acids Res.* 2000; 28:45–8.

699 57. Ashburner M, Ball CA, Blake JA, Botstein D, Butler H, Cherry JM, et al. Gene ontology: tool  
700 for the unification of biology. *Nat. Genet.* 2000; 25:25–9.

701 58. Kanehisa M, Goto S. KEGG: Kyoto encyclopedia of genes and genomes. *Nucleic Acids Res.*  
702 2000; 28:27-30.

703 59. Lowe TM, Eddy SR. tRNAscan-SE: A program for improved detection of transfer RNA genes  
704 in genomic sequence. *Nucleic Acids Res.* 1997; 25:955–64.

- 1  
2  
3  
4  
5  
6  
7  
8  
9  
10  
11  
12  
13  
14  
15  
16  
17  
18  
19  
20  
21  
22  
23  
24  
25  
26  
27  
28  
29  
30  
31  
32  
33  
34  
35  
36  
37  
38  
39  
40  
41  
42  
43  
44  
45  
46  
47  
48  
49  
50  
51  
52  
53  
54  
55  
56  
57  
58  
59  
60  
61  
62  
63  
64  
65
- 705 60. Nawrocki EP, Kolbe DL, Eddy SR. *Infernal 1.0: Inference of RNA alignments*. *Bioinformatics*.  
706 2009; 25:1335–7.
- 707 61. Baird NA, Etter PD, Atwood TS, Currey MC, Shiver AL, Lewis ZA, et al. Rapid SNP  
708 discovery and genetic mapping using sequenced RAD markers. *PloS One*. 2008; 3:e3376.
- 709 62. Li R, Li Y, Fang X, Yang H, Wang J, Kristiansen K, et al. SNP detection for massively  
710 parallel whole-genome resequencing. *Genome Res*. 2009; 19:1124–32.
- 711 63. Li R, Yu C, Li Y, Lam TW, Yiu SM, Kristiansen K, et al. SOAP2: An improved ultrafast tool  
712 for short read alignment. *Bioinformatics*. 2009; 25:1966–7.
- 713 64. Grattapaglia D, Sederoff R. Genetic linkage maps of *Eucalyptus grandis* and *Eucalyptus*  
714 *urophylla* using a pseudo-testcross: Mapping strategy and RAPD markers. *Genetics*. 1994;  
715 137:1121–37.
- 716 65. Li H, Coghlan A, Ruan J, Coin LJ, Heriche JK, Osmotherly L, et al. TreeFam: a curated  
717 database of phylogenetic trees of animal gene families. *Nucleic Acids Res*. 2006;  
718 34:D572–80.
- 719 66. Edgar RC. MUSCLE: Multiple sequence alignment with high accuracy and high throughput.  
720 *Nucleic Acids Res*. 2004; 32:1792–7.
- 721 67. Guindon S, Dufayard JF, Lefort V, Anisimova M, Hordijk W, Gascuel O. New algorithms and  
722 methods to estimate maximum-likelihood phylogenies: Assessing the performance of PhyML  
723 3.0. *Syst. Biol*. 2010; 59:307–21.
- 724 68. Guindon S, Gascuel O. A simple, fast, and accurate algorithm to estimate large phylogenies by  
725 maximum likelihood. *Syst. Biol*. 2003; 52:696–704.
- 726 69. Yang Z. PAML 4: Phylogenetic analysis by maximum likelihood. *Mol. Biol. Evol*. 2007;  
727 24:1586–91.
- 728 70. Yang Z, Rannala B. Bayesian estimation of species divergence times under a molecular clock  
729 using multiple fossil calibrations with soft bounds. *Mol. Biol. Evol*. 2006; 23:212–26.
- 730 71. Hahn MW, Demuth JP, Han SG. Accelerated rate of gene gain and loss in primates. *Genetics*.  
731 2007; 177:1941–9.
- 732 72. Löytynoja A, Goldman N. An algorithm for progressive multiple alignment of sequences with  
733 insertions. *Proc. Natl. Acad. Sci. USA*. 2005; 102:10557–62.
- 734 73. Talavera G, Castresana J. Improvement of phylogenies after removing divergent and  
735 ambiguously aligned blocks from protein sequence alignments. *Syst. Biol*. 2007; 56:564–77.
- 736 74. Dawson AB. A note on the staining of the skeleton of cleared specimens with alizarin red S.  
737 *Biotech. Histochem*. 1926; 1:123-4.

- 1  
2  
3  
4  
5  
6  
7  
8  
9  
10  
11  
12  
13  
14  
15  
16  
17  
18  
19  
20  
21  
22  
23  
24  
25  
26  
27  
28  
29  
30  
31  
32  
33  
34  
35  
36  
37  
38  
39  
40  
41  
42  
43  
44  
45  
46  
47  
48  
49  
50  
51  
52  
53  
54  
55  
56  
57  
58  
59  
60  
61  
62  
63  
64  
65
- 738 75. Gruber HE. Adaptations of Goldner's Masson trichrome stain for the study of undecalcified  
739 plastic embedded bone. *Biotech. Histochem.* 1992; 67:30–4.
- 740 76. Ott HC, Matthiesen TS, Goh SK, Black LD, Kren SM, Netoff TI, et al.  
741 Perfusion-decellularized matrix: using nature's platform to engineer a bioartificial heart. *Nat.*  
742 *Med.* 2008; 14:213–21.
- 743 77. Langmead B, Salzberg SL. Fast gapped-read alignment with Bowtie 2. *Nat. Methods.* 2012;  
744 9:357–9.
- 745 78. Li B, Dewey CN. RSEM: accurate transcript quantification from RNA-Seq data with or  
746 without a reference genome. *BMC Bioinformatics.* 2011; 12:323.
- 747 79. Mortazavi A, Williams BA, McCue K, Schaeffer L, Wold B. Mapping and quantifying  
748 mammalian transcriptomes by RNA-Seq. *Nat. Methods.* 2008; 5:621–8.
- 749 80. Robinson MD, Oshlack A. A scaling normalization method for differential expression analysis  
750 of RNA-seq data. *Genome Biol.* 2010; 11:R25.
- 751 81. Tarazona S, García-Alcalde F, Dopazo J, Ferrer A, Conesa A. Differential expression in  
752 RNA-seq: a matter of depth. *Genome Res.* 2011; 21:2213–23.
- 753 82. Audic S, Claverie JM. The significance of digital gene expression profiles. *Genome Res.* 1997;  
754 7:986–95.
- 755 83. Niimura Y. Evolutionary dynamics of olfactory receptor genes in chordates: interaction  
756 between environments and genomic contents. *Hum. Genomics.* 2009; 4:107–18.
- 757 84. Altschul S, Madden T, Schaffer A, Zhang J, Zhang Z, Miller W, et al. Gapped BLAST and  
758 PSI-BLAST: a new generation of protein database search programs. *Nucleic Acids Res.* 1997;  
759 25:3389–402.
- 760 85. Kumar S, Nei M, Dudley J, Tamura K. MEGA: A biologist-centric software for evolutionary  
761 analysis of DNA and protein sequences. *Brief. Bioinform.* 2008; 9:299–306.
- 762 86. Caporaso JG, Lauber CL, Walters WA, Berg-Lyons D, Lozupone CA, Turnbaugh PJ, et al.  
763 Global patterns of 16S rRNA diversity at a depth of millions of sequences per sample. *Proc.*  
764 *Natl. Acad. Sci. USA.* 2011; 108:4516–22.
- 765 87. Edgar, RC. UPARSE: highly accurate OTU sequences from microbial amplicon reads. *Nat.*  
766 *Methods.* 2013; 10:996–8.
- 767 88. Liu H, Chen CH, Gao ZX, Min JM, Gu YM, Jian JB, et al. The draft genome of *Megalobrama*  
768 *amblycephala* reveals the development of intermuscular bone and adaptation to herbivorous  
769 diet. 2016. GigaScience Database.

1  
2  
3  
4  
5  
6  
7  
8  
9  
10  
11  
12  
13  
14  
15  
16  
17  
18  
19  
20  
21  
22  
23  
24  
25  
26  
27  
28  
29  
30  
31  
32  
33  
34  
35  
36  
37  
38  
39  
40  
41  
42  
43  
44  
45  
46  
47  
48  
49  
50  
51  
52  
53  
54  
55  
56  
57  
58  
59  
60  
61  
62  
63  
64  
65

770 **Figure Legends**

771 **Figure 1** Global view of the *M. amblycephala* genome and syntenic relationship between *C.*  
772 *idellus*, *M. amblycephala* and *D. rerio*. (A) Global view of the *M. amblycephala* genome. From  
773 outside to inside, the genetic linkage map (a); Anchors between the genetic markers and the  
774 assembled scaffolds (b); Assembled chromosomes (c); GC content within a 50-kb sliding window  
775 (d); Repeat content within a 500-kb sliding window (e); Gene distribution on each chromosome (f);  
776 Different gene expression of three transcriptomes (g). (B) Syntenic relationship between *C. idellus*  
777 (a), *M. amblycephala* (b) and *D. rerio* (c) chromosomes.

778 **Figure 2** Phylogenetic tree and comparison of orthologous genes in *M. amblycephala* and other  
779 fish species. (A) Phylogenetic tree of teleosts using 316 single copy orthologous genes. The color  
780 circles at the nodes shows the estimated divergence times using *O. latipes*–*F. rubripes*  
781 [96.9~150.9Mya], *F. rubripes*–*D. rerio* [149.85~165.2Mya], *F. rubripes*–*C. milii* [416~421.75Mya]  
782 (<http://www.timetree.org/>) as the calibration time. Pentagram represents four cyprinid fish with  
783 intermuscular bones. S, silurian period; D, devonian period; C, carboniferous period; P, permian  
784 period in Paleozoic; T, triassic period; J, jurassic and k-cretaceous period in Mesozoic; Pg,  
785 paleogene in Cenozoic Era, N, Neogene. (B) Venn diagram of shared and unique orthologous gene  
786 families in *M. amblycephala* and four other teleosts. (C) Over-represented GO annotations of  
787 cyprinid-specific **expansion genes**.

788 **Figure 3** Regulation of genes related to intermuscular bone formation and function identified from  
789 developmental stages and adult tissues transcriptome data. (A) Gene expression pattern involved  
790 in muscle contraction regulated genes in early developmental stages corresponds to intermuscular  
791 bone formation of *M. amblycephala*, (alizarin red staining). M, myosepta; IB, intermuscular bone.  
792 (B) Scanning electron microscope photos of muscle tissues, connective tissues, and intermuscular  
793 bone. (C) Distribution of intermuscular bone specific genes in GO annotations indicative of  
794 abundance in protein binding, calcium ion binding, GTP binding functions. (D) Several  
795 developmental signals regulating key steps of osteoblast and osteoclast differentiation in the  
796 process of intramembranous ossification. Colored boxes indicate significantly up-regulated genes  
797 in these signals specifically occurred in intermuscular bone.



798 **Figure 4** Molecular characteristics of sensory systems and the composition of gut microbiota in *M.*  
799 *amblycephala*. (A) Extensive expansion of olfactory receptor genes (ORs) in *M. amblycephala*  
800 compared with other teleosts. (B) Phylogeny of ‘beta’ type ORs in eight representative teleost  
801 species showing the significant expansion of ‘beta’ ORs in *M. amblycephala* and *C. idellus*. The  
802 pink background shows cyprinid-specific ‘beta’ types of ORs. (C) Umami, sweet and bitter tastes  
803 related gene families in teleosts with different feeding habits. (D) Structure of the umami receptor  
804 encoding T1R1 gene in cyprinid fish. (E) Relative abundance of microbial flora and taxonomic  
805 assignments in juvenile (LBSB), domestic adult (DBSB), wild adult (BSB) *M. amblycephala* and  
806 wild adult *C. idellus* (GC) samples at the phylum level.

807

808

809

810

811

812

813

814

815

816

817

818

819

820

821

822

823 **Table**

824 **Table 1 Features of the *M. amblycephala* whole genome sequence**

|    |                                            |              |
|----|--------------------------------------------|--------------|
| 4  | Total genome size (Mb)                     | 1,116        |
| 5  | N90 length of scaffold (bp)                | 20,422       |
| 6  | N50 length of scaffold (bp)                | 838,704      |
| 7  | N50 length of contig (bp)                  | 49,400       |
| 8  | Total GC content (%)                       | 37.30        |
| 9  | Protein-coding genes number                | 23,696       |
| 10 | Average gene length (bp)                   | 15,797       |
| 11 | Content of transposable elements (%)       | 34.18        |
| 12 | Number of chromosomes                      | 24           |
| 13 | Number of makers in genetic map            | 5,317        |
| 14 | Scaffolds anchored on linkage groups (LGs) | 1,434        |
| 15 | Length of scaffolds anchored on LGs (Mb)   | 779.54 (70%) |

825

1  
2  
3  
4  
5  
6  
7  
8  
9  
10  
11  
12  
13  
14  
15  
16  
17  
18  
19  
20  
21  
22  
23  
24  
25  
26  
27  
28  
29  
30  
31  
32  
33  
34  
35  
36  
37  
38  
39  
40  
41  
42  
43  
44  
45  
46  
47  
48  
49  
50  
51  
52  
53  
54  
55  
56  
57  
58  
59  
60  
61  
62  
63  
64  
65

1           1           **The draft genome of *Megalobrama amblycephala* reveals the development of**  
2  
3           2           **intermuscular bone and adaptation to herbivorous diet**

4  
5  
6           3           Han Liu<sup>1†</sup>, Chunhai Chen<sup>2†</sup>, Zexia Gao<sup>1†</sup>, Jiumeng Min<sup>2†</sup>, Yongming Gu<sup>3†</sup>, Jianbo Jian<sup>2†</sup>, Xiewu  
7  
8           4           Jiang<sup>3</sup>, Huimin Cai<sup>2</sup>, Ingo Ebersberger<sup>4</sup>, Meng Xu<sup>2</sup>, Xinhui Zhang<sup>1</sup>, Jianwei Chen<sup>2</sup>, Wei Luo<sup>1</sup>,  
9  
10           5           Boxiang Chen<sup>1,3</sup>, Junhui Chen<sup>2</sup>, Hong Liu<sup>1</sup>, Jiang Li<sup>2</sup>, Ruifang Lai<sup>1</sup>, Mingzhou Bai<sup>2</sup>, Jin Wei<sup>1</sup>,  
11  
12           6           Shaokui Yi<sup>1</sup>, Huanling Wang<sup>1</sup>, Xiaojuan Cao<sup>1</sup>, Xiaoyun Zhou<sup>1</sup>, Yuhua Zhao<sup>1</sup>, Kaijian Wei<sup>1</sup>,  
13  
14           7           Ruibin Yang<sup>1</sup>, Bingnan Liu<sup>3</sup>, Shancen Zhao<sup>2</sup>, Xiaodong Fang<sup>2</sup>, Manfred Schartl<sup>5,\*</sup>, Xueqiao  
15  
16           8           Qian<sup>3,\*</sup>, Weimin Wang<sup>1,\*</sup>

17  
18  
19           9  
20  
21           10           \*Equally contributing corresponding authors: wangwm@mail.hzau.edu.cn; xueqiaoqian@263.net;  
22  
23           11           phch1@biozentrum.uni-wuerzburg.de

24  
25           12           †Equal contributors

26  
27           13           <sup>1</sup>College of Fisheries, Key Lab of Freshwater Animal Breeding, Ministry of Agriculture, Key Lab  
28  
29           14           of Agricultural Animal Genetics, Breeding and Reproduction of Ministry of Education, Huazhong  
30  
31           15           Agricultural University, Wuhan 430070, China

32  
33           16           <sup>2</sup>Beijing Genomics Institute (BGI)-Shenzhen, Shenzhen 518083, China

34  
35           17           <sup>3</sup>Guangdong Haid Group Co., Ltd., Guangzhou 511400, China

36  
37           18           <sup>4</sup>Dept. for Applied Bioinformatics, Institute for Cell Biology and Neuroscience, Goethe University,  
38  
39           19           Frankfurt D-60438, Germany

40  
41           20           <sup>5</sup>Physiological Chemistry, University of Würzburg, Biozentrum, Am Hubland, and Comprehensive  
42  
43           21           Cancer Center Mainfranken, University Clinic Würzburg, Würzburg 97070, Germany and Texas  
44  
45           22           A&M Institute for Advanced Study and Department of Biology, Texas A&M University, College  
46  
47           23           Station, TX 77843, USA

29 **Abstract**

30 **Background:** The blunt snout bream, *Megalobrama amblycephala*, is the economically most  
31 important cyprinid fish species. As an herbivore, it can be grown by eco-friendly and  
32 resource-conserving aquaculture. However, the large number of intermuscular bones in the trunk  
33 musculature is adverse to fish meat processing and consumption.

34 **Results:** As a first towards optimizing this aquatic livestock, we present a 1.116-Gb draft genome  
35 of *M. amblycephala*, with 779.54 Mb anchored on 24 linkage groups. Integrating spatiotemporal  
36 transcriptome analyses we show that intermuscular bone is formed in the more basal teleosts by  
37 intramembranous ossification, and may be involved in muscle contractibility and coordinating  
38 cellular events. Comparative analysis revealed that olfactory receptor genes, especially of the beta  
39 type, underwent an extensive expansion in herbivorous cyprinids, whereas the gene for the umami  
40 receptor *TIR1* was specifically lost in *M. amblycephala*. The composition of gut microflora, which  
41 contributes to the herbivorous adaptation of *M. amblycephala*, was found to be similar to that of  
42 other herbivores.

43 **Conclusions:** As a valuable resource for improvement of *M. amblycephala* livestock, the draft  
44 genome sequence offers new insights into the development of intermuscular bone and herbivorous  
45 adaptation.

46  
47 **Keywords:** *Megalobrama amblycephala*, whole genome, herbivorous diet, intermuscular bone,  
48 transcriptome, gut microflora

## 58 **Background**

59 Fishery and aquaculture play an important role in global alimentation. Over the past decades food  
60 fish supply has been increasing with an annual rate of 3.6 percent, about 2 times faster than the  
61 human population [1]. This growth of fish production is meanwhile solely accomplished by an  
62 extension of aquaculture, as over the past thirty years the total mass of captured fish has remained  
63 almost constant [1]. As a consequence of this emphasis on fish breeding, the genomes of various  
64 economically important fish species, e.g. Atlantic cod (*Gadus morhua*) [2], rainbow trout  
65 (*Oncorhynchus mykiss*) [3], European sea bass (*Dicentrarchus labrax*) [4], yellow croaker  
66 (*Larimichthys crocea*) [5], half-smooth tongue sole (*Cynoglossus semilaevis*) [6], tilapia  
67 (*Oreochromis niloticus*) [7] and channel catfish (*Ictalurus punctatus*) [8] have been sequenced.  
68 Yet, the majority of these species are carnivorous requiring large inputs of protein from wild  
69 caught fish or other precious feed. Reports on draft genomes of herbivorous and omnivorous  
70 species, in particular cyprinid fish are scarce. It is well known that cyprinids are currently the  
71 economically most important group of teleosts for sustainable aquaculture. They grow to large  
72 population sizes in the wild and already now account for the majority of freshwater aquaculture  
73 production worldwide [1]. Among these, the herbivorous *Megalobrama amblycephala* (Yih, 1955),  
74 a particularly eco-friendly and resource-conserving species, is predominant in aquaculture and has  
75 been greatly developed in China (Additional file 1: Figure S1) [1]. However, most cyprinids,  
76 including *M. amblycephala*, have a large number of intermuscular bones (IBs) in the trunk  
77 musculature, which have an adverse effect on fish meat processing and consumption. IBs—a  
78 unique form of bone occurring only in the more basal teleosts—are completely embedded within  
79 the myosepta and are not connected to the vertebral column or any other bones [9, 10]. Our  
80 previous study on IB development of *M. amblycephala* revealed that some miRNA-mRNA  
81 interaction pairs may be involved in regulating bone development and differentiation [11].  
82 However, the molecular genetic basis and the evolution of this unique structure are still unclear.  
83 Unfortunately, the recent sequencing of two cyprinid genomes common carp (*Cyprinus carpio*)  
84 [12] and grass carp (*Ctenopharyngodon idellus*) [13], which provided valuable information for  
85 their genetic breeding, contributed little to the understanding of IB formation.

86 In an initial genome survey of *M. amblycephala*, we identified 25,697 single-nucleotide

1  
2  
3  
4  
5  
6  
7  
8  
9  
10  
11  
12  
13  
14  
15  
16  
17  
18  
19  
20  
21  
22  
23  
24  
25  
26  
27  
28  
29  
30  
31  
32  
33  
34  
35  
36  
37  
38  
39  
40  
41  
42  
43  
44  
45  
46  
47  
48  
49  
50  
51  
52  
53  
54  
55  
56  
57  
58  
59  
60  
61  
62  
63  
64  
65

87 polymorphism (SNP) [14], 347 conserved miRNAs [15], and 1,136 miRNA-mRNA interaction  
88 pairs [11]. However, lack of a whole genome sequence resource limited a thorough investigation  
89 of *M. amblycephala*. Here we report the first high-quality draft genome sequence of *M.*  
90 *amblycephala*. Integrating this novel genome resource with tissue- and developmental  
91 stage-specific gene expression information, as well as with meta-genome data to investigate the  
92 composition of the gut microbiome (Workflow shown in additional file 1: Figure S2) provides  
93 relevant insights into the function and evolution of two key features characterizing this species:  
94 The formation of IB and the adaptation to herbivory. By that our study lays the foundation for  
95 genetically optimizing *M. amblycephala* to further increase its relevance for securing human food  
96 supply.

## 97 **Data description**

### 98 **Genome Assembly and Annotation**

99 The *M. amblycephala* genome was sequenced and assembled by a whole-genome shotgun strategy  
100 using genomic DNA from a double-haploid fish (Additional file 1: Table S1). We assembled a  
101 1.116 Gb reference genome sequence from 142.55 Gb (approximately 130-fold coverage) of clean  
102 data [16] (Additional file 1: Tables S1 and S2, Figure S3). The contig and scaffold N50 lengths  
103 reached 49 Kb and 839 Kb, respectively (Table 1). The largest scaffold spans 8,951 Kb and the  
104 4,034 largest scaffolds cover 90% of the assembly. To assess the genome assembly quality, the  
105 mapping of paired end sequence data from the short-insert size WGS libraries, as well as of  
106 published ESTs [14] (Additional file 1: Tables S3 and S4) against the genome assembly indicated  
107 that the number and extent of misassemblies is low. To further estimate the completeness of the  
108 assembly and gene prediction, the benchmarking universal single-copy orthologs (BUSCO) [17]  
109 analysis was used and the results showed that the assembly contains 81.4% complete and 9.1%  
110 partial vertebrate BUSCO orthologues (Additional file 1: Table S5).

111 The *M. amblycephala* genome has an average GC content of 37.3%, similar to cyprinid *C.*  
112 *carpio* and *Danio rerio* (Additional file 1: Figure S4). Using a comprehensive annotation strategy  
113 combining RNA-seq derived transcript evidence, *de-novo* gene prediction and sequence similarity  
114 to proteins from five further fish species, we annotated a total of 23,696 protein-coding genes  
115 (Additional file 1: Table S6). Of the predicted genes, 99.44% (23,563 genes) are annotated by

116 functional database. In addition, we identified 1,796 non-coding RNAs including 474 miRNAs,  
117 220 rRNA, 530 tRNAs, and 572 snRNAs. Transposable elements (TEs) comprise approximately  
118 34.18% (381.3 Mb) of the *M. amblycephala* genome (Additional file 1: Table S7). DNA  
119 transposons (23.80%) and long terminal repeat retrotransposons (LTRs) (9.89%) are the most  
120 abundant TEs in *M. amblycephala*. The proportion of LTRs in *M. amblycephala* is highest in  
121 comparison with other teleosts: *G. morhua* (4.88%) [2], *L. crocea* (2.2%) [5], *C. semilaevis*  
122 (0.08%) [6], *C. carpio* (2.28%) [12], *C. idellus* (2.58%) [13] and stickleback (*Gasterosteus*  
123 *aculeatus*) (1.9%) [18] (Additional file 1: Tables S7 and S8, Figure S5). The distribution of  
124 divergence between the TEs in *M. amblycephala* peaks at 7% (Additional file 1: Figure S6),  
125 indicating a more recent activity of these TEs when compared with *O. mykiss* (13%) [3] and *C.*  
126 *semilaevis* (9%) [6].

### 127 **Anchoring Scaffolds and Shared Synteny Analysis**

128 Sequencing data from 198 F1 specimens, including the parents, were used as the mapping  
129 population to anchor the scaffolds on to 24 pseudo-chromosomes of the *M. amblycephala* genome.  
130 Following RAD-Seq and sequencing protocol, 1883.5 Mb of 125-bp reads (on average 30.6 Mb  
131 and 9.3 Mb of read data for each parent and progeny, respectively) were generated on the HiSeq  
132 2500 next-generation sequencing platform. Based on the SOAP bioinformatic pipeline, we  
133 generated 5,317 SNP markers for constructing a high-resolution genetic map. The map spans  
134 1,701 cM with a mean marker distance of 0.33 cM and facilitated an anchoring of 1,434 scaffolds  
135 comprising 70% (779.54 Mb) of the *M. amblycephala* genome assembly to form 24 linkage  
136 groups (LG) (Additional file 1: Table S9). Of the anchored scaffolds, 598 could additionally be  
137 oriented (678.27 Mb, 87.01% of the total anchored sequences) (Figure 1A). A subsequent  
138 comparison of the gene order between *M. amblycephala* and its close relative *C. idellus* revealed  
139 607 large shared syntenic blocks encompassing 11,259 genes, and 190 chromosomal  
140 rearrangements. The values change to 1,062 regions, 13,152 genes and 279 rearrangements when  
141 considering *D. rerio*. The unexpected higher number of genes in syntenic regions shared with the  
142 more distantly related *D. rerio* is most likely an effect of the more complete genome assembly of  
143 this species compared to *C. idellus*. The rearrangement events are distributed across all *M.*  
144 *amblycephala* linkage groups without evidence for a local clustering (Figure 1B). The most

145 prominent event is a chromosomal fusion in *M. amblycephala* LG02 that joined two *D. rerio*  
146 chromosomes, Dre10 and Dre22. The same fusion is observed in *C. idellus* but not in *C. carpio*  
147 suggesting that it probably occurred in a last common ancestor of *M. amblycephala* and *C. idellus*,  
148 approximately 13.1 million years ago (Additional file 1: Figure S7).

## 149 **Results**

### 150 **Evolutionary Analysis**

151 A phylogenetic analysis of 316 single-copy genes with one to one orthologs in the genomes of 10  
152 other fish species, and coelacanth (*Latimeria chalumnae*) and elephant shark (*Callorhynchus milii*),  
153 as out group served as a basis for investigating the evolutionary trajectory of *M. amblycephala*  
154 (Figure 2A, Additional file 1: Figure S8). To illuminate the evolutionary process resulting in the  
155 adaptation to a grass diet, we analyzed the functional categories of expanded genes in the *M.*  
156 *amblycephala* and *C. idellus* lineage (Additional file 1: Figure S9, Additional file 2: Data Note1),  
157 two typical herbivores mainly feeding on aquatic and terrestrial grasses. Among the significantly  
158 over-represented KEGG pathways (Fisher's exact test,  $P < 0.01$ ), we find olfactory transduction  
159 (ko04740), immune-related pathways (ko04090, ko04672, ko04612 and ko04621), lipid metabolic  
160 related process (ko00590, ko03320, ko00591, ko00565, ko00592 and ko04975), as well as  
161 xenobiotics biodegradation and metabolism (ko00625 and ko00363) (Figure S10). Indeed, when  
162 tracing positively selected genes (PSG) in *M. amblycephala* and *C. idellus* (Additional file 3: Date  
163 Note2), we identified 10 candidates involved in starch and sucrose metabolism (ko00500), in  
164 citrate cycle (ko00020) and in other types of O-glycan biosynthesis (ko00514). Moreover, 10  
165 genes encoding enzymes involved in lipid metabolism appear positively selected in both fish  
166 species (Additional file 1: Table S10).

### 167 **Development of Intermuscular Bones**

168 To explain the genetic basis of IB, their formation and their function in cyprinids, we first  
169 analyzed the functional annotation of genes that expanded in this lineage (Figure 2C). Many of  
170 these genes are involved in cell adhesion (GO: 0007155,  $P = 5.26E-32$ , 357 genes), myosin  
171 complex (GO:0016459,  $P = 2.74E-08$ , 100 genes) and cell-matrix adhesion (GO:0007160,  
172  $P = 1.59E-21$ , 69 genes) (Figure 2C). As a second line of evidence, we performed transcriptome



173 analyses of early developmental stages (stage1: whole larvae without IBs) and juvenile *M.*  
174 *amblycephala* (stage2: trunk muscle with partial IBs; stage3: trunk muscle with completed IBs)  
175 (Figure 3A). Compared with stage1, 388 and 651 differentially expressed genes (DEGs) are  
176 up-regulated in stage2 and stage3, respectively. And 249 of them are significantly up-regulated  
177 both in stage2 and stage3. KEGG analyses indicate many of these genes involved in tight junction  
178 (ko04530), regulation of actin cytoskeleton (ko04810), cardiac muscle contraction (ko04260) and  
179 vascular smooth muscle contraction (ko04270) (Additional file 1: Figure S11). Specifically, 26  
180 genes encoding proteins related to muscle contraction, including titin, troponin, myosin, actinin,  
181 calmodulin and other Ca<sup>2+</sup> transporting ATPases (Figure 3A) point to a strong remodeling of the  
182 musculature compartment. To confirm that the observed differences in gene expression are indeed  
183 linked to IB formation and function and are not simply due to the fact that different developmental  
184 stages were compared, we performed differential expression analysis of muscle tissues, IB, and  
185 connective tissues from the same six months old individual of *M. amblycephala* (Figure 3B,  
186 Additional file 1: Figure S12). 1,290 DEGs and 5,231 DEGs are significantly up-regulated in IB  
187 compared with connective tissues and muscle, respectively. 24 of these DEGs encode extracellular  
188 matrix (ECM) proteins (collagens and integrin-binding protein), Rho GTPase family (*RhoA*, *Rho*  
189 *GAP*, *Rac*, *Ras*), motor proteins (myosin, dynein, actin), and calcium channel regulation proteins  
190 (Additional file 1: Figure S13 and Table S11). In addition, GO annotations of 963 IB-specific  
191 genes indicative of abundance in protein binding (GO:0005515), calcium ion binding  
192 (GO:0005509), GTP binding (GO:0005525) and iron ion binding (GO:0005506) were found  
193 (Figure 3C).

194 During development of *M. amblycephala*, the first IB appears in muscles of caudal vertebrae  
195 as early as 28 days post fertilization (dpf) when body length is 12.95 mm (Additional file 1: Figure  
196 S14). The system then develops and ossifies predominantly from posterior to anterior (Additional  
197 file 1: Figure S15). IBs are present throughout the body within two months (Additional file 1:  
198 Figure S16) and develop into multiple morphological types in adults (Additional file 1: Figure  
199 S17). The bone is formed directly without an intermediate cartilaginous stage (Additional file 1:  
200 Figures S18 and S19). We also found a large number of mature osteoblasts distributed at the edge  
201 of the bone matrix while some osteocytes were apparent in the center of the mineralized bone

1  
2  
3  
4  
5  
6  
7  
8  
9  
10  
11  
12  
13  
14  
202 matrix (Additional file 1: Figures S20 and S21). These primary bone-forming cells predominantly  
203 regulate bone formation and function throughout life. Notably, among the genes up-regulated in  
204 IB, 35 bone formation regulatory genes were identified (shown in colored boxes in Figure 3D). In  
205 particular, genes involved in bone morphogenetic protein (BMP) signaling including *Bmp3*,  
206 *Smad8*, *Smad9*, and *Id2*, in fibroblast growth factor (FGF) signaling including *Fgf2*, *Fgfr1a*,  
207 *Fgfbp2*, *Col6a3*, and *Col4a5*, and in Ca<sup>2+</sup> channels including *Cacna1c*, *CaM*, *Creb5* and *Nfatc*  
208 were highly expressed (>2-fold change) in IB (Additional file 1: Figure S22).

### 209 **Adaptation to Herbivorous Diet**

17  
18  
19  
20  
21  
22  
23  
24  
25  
26  
27  
28  
29  
30  
31  
32  
33  
34  
35  
36  
37  
38  
39  
40  
210 Next to the presence of IB, the herbivory of *M. amblycephala* is the second key feature in  
211 connection to the use of this species as aquatic livestock. Olfaction, the sense of smell, is crucial  
212 for animals to find food. The perception of smell is mediated by a large gene family of olfactory  
213 receptor (OR) genes. In the *M. amblycephala* genome, we identified 179 functional olfactory  
214 receptor (OR) genes (Figure 4A), and based on the classification of Niimura [19], 158, 117 and  
215 153 receptors for water-borne odorants were identified in *M. amblycephala*, *C. idellus* and *D.*  
216 *rerio*, respectively (Additional file 1: Table S12). Overall, these receptor repertoires are  
217 substantially larger than those of other and carnivorous teleosts (*G. morhua*, *C. semilaevis*, *O.*  
218 *latipes*, *X. maculatus*) (Additional file 1: Figures S23 and S24, Table S12). In addition, we found  
219 a massive expansion of beta-type OR genes in the genomes of the herbivorous *M. amblycephala*  
220 and *C. idellus*, while very few exist in other teleosts (Figure 4B, Additional file 1: Table S12).

41  
42  
43  
44  
45  
46  
47  
48  
49  
50  
51  
52  
53  
54  
55  
56  
57  
58  
59  
60  
61  
62  
63  
64  
65  
221 Taste is also an important factor in the development of dietary habits. Most animals can  
222 perceive five basic tastes, namely sourness, sweetness, bitterness, saltiness and umami [20]. *T1R1*,  
223 the receptor gene necessary for sensing umami, has been lost in herbivorous *M. amblycephala* but  
224 is duplicated in carnivorous *G. morhua*, *C. semilaevis* and omnivorous *O. latipes* and *X. maculatus*  
225 (Figures 4C and 4D, Additional file 1: Figures S25-26 and Table S13). In contrast, *T1R2*, the  
226 receptor gene for sensing sweet, has been duplicated in herbivorous *M. amblycephala* and *C.*  
227 *idellus*, omnivorous *C. carpio* and *D. rerio*, while it has been lost in carnivorous *G. morhua* and *C.*  
228 *semilaevis* (Additional file 1: Figure S27 and Table S13). Also the *T2R* gene family, most likely  
229 important in the course switching to a diet that contains a larger fraction of bitterness containing

230 food, has been expanded in *M. amblycephala*, *C. idellus*, *C. carpio* and *D. rerio* (Additional file 1:  
231 Figure S28).

232 To obtain further insights into the genetic adaptation to herbivorous diet, we focused on  
233 further genes that might be associated with digestion. Genes that encode proteases (including  
234 pepsin, trypsin, cathepsin and chymotrypsin) and amylases (including alpha-amylase and  
235 glucoamylase) were identified in the genomes of *M. amblycephala*, carnivorous *C. semilaevis*, *G.*  
236 *morhua* and omnivorous *D. rerio*, *O. latipes* and *X. maculatus*, indicating that herbivorous *M.*  
237 *amblycephala* has a protease repertoire that is not substantially different from those of carnivorous  
238 and omnivorous fishes (Additional file 1: Table S14). We did not identify any genes encoding  
239 potentially cellulose-degrading enzymes including endoglucanase, exoglucanase and  
240 beta-glucosidase in the genome of *M. amblycephala*, suggesting that utilization of the herbivorous  
241 diet may largely depend on the gut microbiome. To elucidate this further, we determined the  
242 composition of the gut microbial communities of juvenile, domestic, wild adult *M. amblycephala*  
243 and wild adult *C. idellus* using bacterial 16S rRNA sequencing. A total of 549,020 filtered high  
244 quality sequence reads from 12 samples were clustered at a similarity level of 97%. The resulting  
245 8,558 operational taxonomic units (OTUs) are dominated at phylum level by Proteobacteria,  
246 Fusobacteria, Bacteroidetes, Firmicutes and Actinobacteria (Additional file 1: Table S15, Figure  
247 4E). Increasing the resolution to the genus level, the composition and relative abundance of the  
248 gut microbiota of wild adult *M. amblycephala* and *C. idellus* are still very similar (Additional file  
249 1: Table S16) and we could identify more than 7% cellulose-degrading bacteria (Additional file 1:  
250 Table S17).

## 251 Discussion

252 The evolutionary trajectory analysis of *M. amblycephala* and other teleosts revealed that *M.*  
253 *amblycephala* has the closest relationship to *C. idellus*. Both the species are herbivorous fish but  
254 which endogenous and exogenous factors affected their feeding habits and how they adapted to  
255 their herbivorous diet is not known. Our results from the expanded genes and PSG in the lineage  
256 of the two herbivores uncovered a number of genes that are involved in glucose, lipid and  
257 xenobiotics metabolism, which would enhance the ability of an herbivore to detoxify the

1  
2  
3  
4  
5  
6  
7  
8  
9  
10  
11  
12  
13  
14  
15  
16  
17  
18  
19  
20  
21  
22  
23  
24  
25  
26  
27  
28  
29  
30  
31  
32  
33  
34  
35  
36  
37  
38  
39  
40  
41  
42  
43  
44  
45  
46  
47  
48  
49  
50  
51  
52  
53  
54  
55  
56  
57  
58  
59  
60  
61  
62  
63  
64  
65

258 secondary compounds present in grasses that are adverse or even toxic to the organism.  
259 Furthermore, the high-fiber but low-energy grass diet requires a highly effective intermediate  
260 metabolism that accelerates carbohydrate and lipid catabolism and conversion into energy to  
261 maintain physiological functions.

262 Olfaction and taste are also crucial for animals to find food and to distinguish whether  
263 potential food is edible or harmful [21, 22]. The ORs of teleosts are predominantly expressed in  
264 the main olfactory epithelium of the nasal cavity [21, 23] and can discriminate, like those of other  
265 vertebrates, different kinds of odor molecules. Previous studies have demonstrated that the beta  
266 type OR genes are present in both aquatic and terrestrial vertebrates, indicating that the  
267 corresponding receptors detect both water-soluble and airborne odorants [19, 21]. In the present  
268 study, the search for genes encoding OR showed that herbivorous *M. amblycephala* and *C. idellus*  
269 have a large number of beta-type OR, while other omnivorous and carnivorous fish only have one  
270 or two. This might be attributed to their particular herbivorous diet consisting not only of aquatic  
271 grasses but also the duckweed and terrestrial grasses, which they ingest from the water surface.

272 It is known that the receptor for umami is formed by the T1R1/T1R3 heterodimer, while  
273 T1R2/T1R3 senses sweet taste [24]. We found that the umami gene *T1R1* was lost in herbivorous  
274 *M. amblycephala* but duplicated in the carnivorous *G. morhua* and *C. Semilaevis*. The loss of the  
275 *T1R1* gene in *M. amblycephala* might exclude the expression of a functional umami taste receptor.  
276 Such situations in other organism, e.g. the Chinese panda, have previously been related to feeding  
277 specialization [25]. Bitterness sensed by the *T2R* is particularly crucial for animals to protect them  
278 from poisonous compounds [22]. Interestingly, the bitter receptor *T2R* genes are expanded in the  
279 herbivorous fish but few or no copy was found in carnivorous fish. These results not only indicate  
280 the genetic adaptation to herbivorous diet of *M. amblycephala*, but also provided a clear and  
281 comprehensive picture of adaptive evolutionary mechanisms of sensory systems in other fish  
282 species with different trophic specializations.

283 It has been reported that some insects such as *Tenebrio molitor* [26] and *Neotermes*  
284 *koshunensis* [27], and the mollusc *Corbicula japonica* [28] have genes encoding endogenous  
285 cellulose degradation-related enzymes. However, all so far analyzed herbivorous vertebrates lack  
286 these genes and always rely on their gut microbiome to digest food [25, 29]. In herbivorous *M.*

1  
2  
3  
4  
5  
6  
7  
8  
9  
10  
11  
12  
13  
14  
15  
16  
17  
18  
19  
20  
21  
22  
23  
24  
25  
26  
27  
28  
29  
30  
31  
32  
33  
34  
35  
36  
37  
38  
39  
40  
41  
42  
43  
44  
45  
46  
47  
48  
49  
50  
51  
52  
53  
54  
55  
56  
57  
58  
59  
60  
61  
62  
63  
64  
65

287 *amblycephala* and *C. idellus*, we also did not find any homologues of digestive cellulase genes.  
288 Interestingly, our work on the composition of gut microbiota of the two fish species identifies  
289 more than 7% cellulose-degrading bacteria, suggesting that the cellulose degradation of  
290 herbivorous fish largely depend on their gut microbiome.

291 IB has evolved several times during teleost evolution [9, 30]. The developmental mechanisms  
292 and ossification processes forming IB are dramatically distinct from other bones such as ribs,  
293 skeleton, vertebrae or spines. These usually develop from cartilaginous bone and are derived from  
294 the mesenchymal cell population by endochondral ossification [31, 32]. However, IB form directly  
295 by intramembranous ossification and differentiate from osteoblasts within connective tissue,  
296 forming segmental, serially homologous ossifications in the myosepta. Although various methods  
297 of ossification of IB have been proposed, few experiments have been conducted to confirm the  
298 ossification process and little is known about the potential role of IB in teleosts. Based on our  
299 findings of expanded genes in cyprinid lineage and evidence from transcriptome of developmental  
300 stages of IB formation, a number of genes were found to interact dynamically to mediate efficient  
301 cell motility, migration and muscle construction [33-36]. In addition, transcriptome analyses of  
302 three tissues indicated that ECM, Rho GTPase, motor and calcium channel regulation protein  
303 displayed high expression in IB. It is known that ECM proteins bound to integrins influence cell  
304 migration by actomyosin-generated contractile forces [34, 37]. Rho GTPases, acting as molecular  
305 switches, are also involved in regulating the actin cytoskeleton and cell migration, which in turn  
306 initiates intracellular signaling and contributes to tissue repair and regeneration [38-40]. Thus, our  
307 results provide molecular evidence that IB might play significant roles not only in regulating  
308 muscle contraction but also in active remodeling at the bone-muscle interface and coordination of  
309 cellular events.

310 Some major developmental signals including BMP, FGF, WNT, together with  
311 calcium/calmodulin signaling [31, 41-43], are essential for regulating the differentiation and  
312 function of osteoblasts and osteocytes and for regulating the RANKL signaling pathway for  
313 osteoclasts [44]. In agreement with this concept, we found 35 bone formation regulatory genes  
314 involved in these signals were highly up-regulated in IB. Among these signaling pathways, in  
315 particular, *Bmp*, *Fgf2*, and *Fgfr1* are closely related to intramembranous bone development and

1  
2  
3  
4  
5  
6  
7  
8  
9  
10  
11  
12  
13  
14  
15  
16  
17  
18  
19  
20  
21  
22  
23  
24  
25  
26  
27  
28  
29  
30  
31  
32  
33  
34  
35  
36  
37  
38  
39  
40  
41  
42  
43  
44  
45  
46  
47  
48  
49  
50  
51  
52  
53  
54  
55  
56  
57  
58  
59  
60  
61  
62  
63  
64  
65

316 affect the expression and activity of other osteogenesis related transcription factors [31, 45]. The  
317 calcium-sensitive transcription factor *NFATc1* together with *CREB* induces the expression of  
318 osteoclast-specific genes [46]. Taken together, these results suggest that IB indeed undergoes an  
319 intramembranous ossification process, is regulated by bone-specific signaling pathways, and  
320 underlies a homeostasis of maintenance, repair and remodeling.

## 321 **Conclusions**

322 Our results provide novel functional insights into the evolution of cyprinids. Importantly, the *M.*  
323 *amblycephala* genome data come up with novel insights shedding light on the adaptation to  
324 herbivorous nutrition and evolution and formation of IB. Our results on the evolution of gene  
325 families, digestive and sensory system, as well as our microbiome meta-analysis and  
326 transcriptome data provide powerful evidence and a key database for future investigations to  
327 increase the understanding of the specific characteristics of *M. amblycephala* and other fish  
328 species.

## 329 **Methods**

### 330 **Sampling and DNA Extraction**

331 DNA for genome sequencing was derived from a double haploid fish from the *M. amblycephala*  
332 genetic breeding center at Huazhong Agricultural University (Wuhan, Hubei, China). Fish blood  
333 was collected from adult female fish caudal vein using sterile injectors with pre-added  
334 anticoagulant solutions following anesthetized with MS-222 and sterilization with 75% alcohol.  
335 Genomic DNA was extracted from the whole blood.

### 336 **Genomic Sequencing and Assembly**

337 Libraries with different insert sized inserts of 170 bp, 500 bp, 800 bp, 2 Kb, 5 Kb, 10 Kb and 20  
338 Kb were constructed from the genomic DNA at BGI-Shenzhen. The libraries were sequenced  
339 using a HiSeq2000 instrument. In total, 11 libraries, sequenced in 23 lanes were constructed. To  
340 obtain high quality data, we applied filtering criteria for the raw reads. As a result, 142.55 Gb of  
341 filtered data were used to complete the genome assembly using SOAPdenovo\_V2.04 [16]. Only  
342 filtered data were used in the genome assembly. First, the short insert size library data were used  
343 to construct a de Bruijn graph. The tips, merged bubbles and connections with low coverage were

1  
2  
3  
4  
5  
6  
7  
8  
9  
10  
11  
12  
13  
14  
15  
16  
17  
18  
19  
20  
21  
22  
23  
24  
25  
26  
27  
28  
29  
30  
31  
32  
33  
34  
35  
36  
37  
38  
39  
40  
41  
42  
43  
44  
45  
46  
47  
48  
49  
50  
51  
52  
53  
54  
55  
56  
57  
58  
59  
60  
61  
62  
63  
64  
65

344 removed before resolving the small repeats. Second, all high-quality reads were realigned with the  
345 contig sequences. The number of shared paired-end relationships between pairs of contigs was  
346 calculated and weighted with the rate of consistent and conflicting paired ends before constructing  
347 the scaffolds in a stepwise manner from the short-insert size paired ends to the long-insert size  
348 paired ends. Third, the gaps between the constructed scaffolds were composed mainly of repeats,  
349 which were masked during scaffold construction. These gaps were closed using the paired-end  
350 information to retrieve read pairs in which one end mapped to a unique contig and the other was  
351 located in the gap region. Subsequently, local assembly was conducted for these collected reads.  
352 To assess the genome assembly quality, approximately 42.82 Gb Illumina reads generated from  
353 short-insert size libraries were mapped onto the genome. Bwa0.5.9-r16 software [47] with default  
354 parameters was used to assess the mapping ratio and Soap coverage 2.27 was used to calculate the  
355 sequencing depth. We also assessed the accuracy of the genome assembly by Trinity [48],  
356 including number of ESTs and new mRNA reads from early stages of embryos and multiple  
357 tissues, by aligning the scaffolds to the assembled transcriptome sequences.

358 After obtaining K-mers from the short-insert-size (<1Kb) reads with just one bp slide,  
359 frequencies of each K-mer were calculated. The K-mer frequency fits Poisson distribution when a  
360 sufficient amount of data is present. The total genome size was deduced from these data in the  
361 following way: Genome size = K-mer num / Peak\_depth.

### 362 **Genome Annotation**

363 The genome was searched for repetitive elements using Tandem Repeats Finder (version 4.04)  
364 [49]. TEs were identified using homology-based approaches. The Repbase (version 16.10) [50]  
365 database of known repeats and a *de novo* repeat library generated by RepeatModeler were used.  
366 This database was mapped using the software of RepeatMasker (version 3.3.0). Four types of  
367 non-coding RNAs (microRNAs, transfer RNAs, ribosomal RNAs and small nuclear RNAs) were  
368 also annotated using tRNAscan-SE (version 1.23) and the Rfam database45 (Release 9.1) [51].

369 For gene prediction, *de novo* gene prediction, homology-based methods and RNA-seq data  
370 were used to perform gene prediction. For the sequence similarity based prediction, *D. rerio*, *G.*  
371 *aculeatus*, *O. niloticus*, *O. latipes* and *G. morhua* protein sequences were downloaded from  
372 Ensembl (release 73) and were aligned to the *M. amblycephala* genome using TBLASTN. Then

1  
2  
3  
4  
5  
6  
7  
8  
9  
10  
11  
12  
13  
14  
15  
16  
17  
18  
19  
20  
21  
22  
23  
24  
25  
26  
27  
28  
29  
30  
31  
32  
33  
34  
35  
36  
37  
38  
39  
40  
41  
42  
43  
44  
45  
46  
47  
48  
49  
50  
51  
52  
53  
54  
55  
56  
57  
58  
59  
60  
61  
62  
63  
64  
65

373 homologous genome sequences were aligned against the matching proteins using GeneWise [52]  
374 to define gene models. Augustus was employed to predict coding genes using appropriate  
375 parameters in *de novo* prediction. For the RNA-seq based prediction, we mapped transcriptome  
376 reads to the genome assembly using TopHat [53]. Then, we combined TopHat mapping results  
377 together and applied Cufflinks [54] to predict transcript structures. All predicted gene structures  
378 were integrated by GLEAN [55] (<http://sourceforge.net/projects/glean-gene/>) to obtain a  
379 consensus gene set. Gene functions were assigned to the translated protein-coding genes using  
380 Blastp tool, based on their highest match to proteins in the SwissProt and TrEMBL [56] databases  
381 (Uniprot release 2011-01). Motifs and domains in the protein-coding genes were determined by  
382 InterProScan (version 4.7) searches against six different protein databases: ProDom, PRINTS,  
383 Pfam, SMART, PANTHER and PROSITE. Gene Ontology [57] IDs for each gene were obtained  
384 from the corresponding InterPro entries. All genes were aligned against KEGG [58] (Release 58)  
385 database, and the pathway in which the gene might be involved was derived from the matched  
386 genes in KEGG. tRNA genes were *de novo* predicted by tRNAscan-SE software [59], with  
387 eukaryote parameters on the repeat pre-masked genome. The rRNA fragments were identified by  
388 aligning the rRNA sequences using BlastN at E-value 1e-5. The snRNA and miRNA were  
389 searched by the method of aligning and searching with INFERNAL (version 0.81) [60] against  
390 Rfam database (release 9.1).

### 391 **Genetic Map Construction**

392 To anchor the scaffolds into pseudo-chromosomes, 198 F1 population individuals were used to  
393 obtain the genetic map. Each of the individual genomic DNA was digested with the restriction  
394 endonuclease EcoR I, following the RAD-Seq protocol [61]. The SNP calling process was carried  
395 out using the SOAP bioinformatic pipeline. The RAD-based SNP calling was done by SOAPSnp  
396 software [62] after each individual's paired-end RAD reads was mapped onto the assembled  
397 reference genome with the alignment software SOAP2 [63]. The potential SNP markers were used  
398 for the linkage analysis if the following criteria were satisfied: for parents - sequencing depth  $\geq 8$   
399 and  $\leq 100$ , base quality  $\geq 25$ , copy number  $\leq 1.5$ ; for progeny - sequencing depth  $\geq 5$ , base quality  
400  $\geq 20$ , copy number  $\leq 1.5$ . If the markers were showing significantly distorted segregation ( $P$ -value  
401  $< 0.01$ ), they were excluded from the map construction. Linkage analysis was performed only for



1  
2  
3  
4  
5  
6  
7  
8  
9  
10  
11  
12  
13  
14  
15  
16  
17  
18  
19  
20  
21  
22  
23  
24  
25  
26  
27  
28  
29  
30  
31  
32  
33  
34  
35  
36  
37  
38  
39  
40  
41  
42  
43  
44  
45  
46  
47  
48  
49  
50  
51  
52  
53  
54  
55  
56  
57  
58  
59  
60  
61  
62  
63  
64  
65

402 markers present in at least 80% of the genomes, using JoinMap 4.0 software with CP population  
403 type codes and applying the double pseudo-test cross strategy [64]. The linkage groups were  
404 formed at a logarithm of odds threshold of 6.0 and ordered using the regression mapping  
405 algorithm.

#### 406 **Construction of Gene Families**

407 We identified gene families using TreeFam software [65] as follows: Blast was used to compare  
408 all the protein sequences from 13 species: *M. amblycephala*, *C. idellus*, *C. semilaevis*, *C. carpio*,  
409 *D. rerio*, *Callorhinchus milii*, *G. morhua*, *G. aculeatus*, *Latimeria chalumnae*, *Oncorhynchus*  
410 *mykiss*, *O. niloticus*, *O. latipes*, *Fugu rubripes*, with the E-value threshold set as 1e-7. In the next  
411 step, HSP segments of each protein pair were concatenated by Solar software. H-scores were  
412 computed based on Bit-scores and these were taken to evaluate the similarity among genes.  
413 Finally, gene families were obtained by clustering of homologous gene sequences using  
414 Hcluster\_sg (Version 0.5.0). Specific genes of *M. amblycephala* were those that did not cluster  
415 with other vertebrates that were chosen for gene family construction, and those that did not have  
416 homologs in the predicted gene repertoire of the compared genomes. If these genes had functional  
417 motifs, they were annotated by GO.

#### 418 **Phylogenetic Tree Reconstruction and Divergence Time Estimation**

419 The coding sequences of single-copy gene families conserved among *M. amblycephala*, *C. idellus*,  
420 *C. carpio*, *D. rerio*, *C. semilaevis*, *G. morhua*, *G. aculeatus*, *Latimeria chalumnae*, *O. mykiss*, *O.*  
421 *niloticus*, *O. latipes*, *C. milii* and *Fugu rubripes* (Ensembl Gene v.77) were extracted and aligned  
422 with guidance from amino-acid alignments created by the MUSCLE program [66]. The individual  
423 sequence alignments were then concatenated to form one supermatrix. PhyML [67, 68] was  
424 applied to construct the phylogenetic tree under an HKY85+gamma model for nucleotide  
425 sequences. ALRT values were taken to assess the branch reliability in PhyML. The same set of  
426 codon sequences at position 2 was used for phylogenetic tree construction and estimation of the  
427 divergence time. The PAML mcmctree program (PAML version 4.5) [69, 70] was used to  
428 determine divergence times with the approximate likelihood calculation method and the correlated  
429 molecular clock and REV substitution model.

#### 430 **Gene Family Expansion and Contraction Analyses**

1  
2  
3  
4  
5  
6  
7  
8  
9  
10  
11  
12  
13  
14  
15  
16  
17  
18  
19  
20  
21  
22  
23  
24  
25  
26  
27  
28  
29  
30  
31  
32  
33  
34  
35  
36  
37  
38  
39  
40  
41  
42  
43  
44  
45  
46  
47  
48  
49  
50  
51  
52  
53  
54  
55  
56  
57  
58  
59  
60  
61  
62  
63  
64  
65

431 Protein sequences of *M. amblycephala* and 11 other related species (Ensembl Gene v.77)) were  
432 used in BLAST searches to identify homologs. We identified gene families using CAFÉ [71],  
433 which employs a random birth and death model to study gene gains and losses in gene families  
434 across a user-specified phylogeny. The global parameter  $\lambda$ , which describes both the gene birth ( $\lambda$ )  
435 and death ( $\mu = -\lambda$ ) rate across all branches in the tree for all gene families, was estimated using  
436 maximum likelihood. A conditional *P*-value was calculated for each gene family, and families  
437 with conditional *P*-values less than the threshold (0.05) were considered as having notable gain or  
438 loss. We identified branches responsible for low overall *P*-values of significant families.

### 439 **Detection of Positively Selected Genes**

440 We calculated Ka/Ks ratios for all single copy orthologs of *M. amblycephala* and *C. semilaevis*, *D.*  
441 *rerio*, *G. morhua*, *O. niloticus* and *C. carpio*. Alignment quality was essential for estimating  
442 positive selection. Thus, orthologous genes were first aligned by PRANK [72], which is  
443 considerably conservative for inferring positive selection. We used Gblocks [73] to remove  
444 ambiguously aligned blocks within PRANK alignments and employed ‘codeml’ in the PAML  
445 package with the free-ratio model to estimate Ka, Ks, and Ka/Ks ratios on different branches. The  
446 differences in mean Ka/Ks ratios for single-copy genes between *M. amblycephala* and each of the  
447 other species were compared using paired Wilcoxon rank sum tests. Genes that showed values of  
448 Ka/Ks higher than 1 along the branch leading to *M. amblycephala* were reanalyzed using the  
449 codon based branch-site tests implemented in PAML. The branch-site model allowed  $\omega$  to vary  
450 both among sites in the protein and across branches, and was used to detect episodic positive  
451 selection.

### 452 **Developmental Process of Intermuscular Bone in *M. amblycephala***

453 To better understand the number and morphological types of IBs in adult *M. amblycephala*,  
454 specimens with a body length ranging from 15.5 to 20.5 cm were collected and each individual  
455 was wrapped in gauze and boiled. The fish body was divided into two sections: anterior (snout to  
456 cloaca) and posterior (cloaca to the base of caudal fin), and the length of each section was  
457 measured. The IBs were retrieved, counted, arranged in order and photographed with a digital  
458 camera. Fertilized *M. amblycephala* eggs were brought from hatching facilities at Freshwater Fish  
459 Genetics Breeding Center of Huazhong Agricultural University (Wuhan, Hubei, China) to our

1  
2  
3  
4  
5  
6  
7  
8  
9  
10  
11  
12  
13  
14  
15  
16  
17  
18  
19  
20  
21  
22  
23  
24  
25  
26  
27  
28  
29  
30  
31  
32  
33  
34  
35  
460 laboratory. *M. amblycephala* larvae were maintained in a re-circulating aquaculture system at 23 ±  
461 1°C with a 14-hr photoperiod. To explore the early development of IBs, larvae at different stages  
462 from 15 to 40 dpf were collected and fixed in 4% paraformaldehyde and transferred to 70%  
463 ethanol for storage. Specimens were stained with alizarin red for bone following the method  
464 described by Dawson [74]. The appearance of red color was recorded as the appearance of IB  
465 because bone ossification is accompanied by the uptake of alizarin red, resulting in red staining of  
466 the mineralized bone matrix. Myosepta, either not yet ossified, or poorly ossified, are not visible  
467 with alizarin red staining. For histologic analysis, specimens were paraffin-embedded and  
468 sectioned following standard protocols. Sections were stained with hematoxylin and eosin (HE)  
469 and Masson trichrome [75] and photographed using a Nikon microscope (Nikon, Tokyo, Japan)  
470 with a DP70 digital camera (Olympus, Japan). Scanning electron microscopy (SEM) and  
471 transmission electron microscopy (TEM) were also conducted to analyze the ultrastructure of IB.  
472 The specimens were fixed with 2.5% (v/v) glutaraldehyde in a solution of 0.1 M sodium  
473 cacodylate buffer (pH 7.3) for 2 h at room temperature. The SEM and TEM samples were  
474 prepared according to a standard protocol described by Ott [76]. The samples were then visualized  
475 with a JSM-6390LV scanning electron microscope (SEM, Japan) and the stained ultrathin sections  
476 with a H-7650 transmission electron microscope (Hitachi, Japan).

### 36 477 **RNA Sequencing Analysis**

37  
38 478 *M. amblycephala* specimens belonging to three different developmental stages of IBs (stage 1: whole  
39  
40 479 larvae without distribution of IB; stage 2: muscle tissues with partial distribution of IBs; stage 3:  
41  
42 480 muscle tissues with completed distribution of IBs were identified under microscope and immediately  
43  
44 481 frozen in liquid nitrogen. In addition, dorsal white muscle, IBs and connective tissue surrounding the  
45  
46 482 IBs from six months old fish were also collected. RNA was extracted from total fish samples at  
47  
48 483 different stages and from individual muscle, connective tissue, and intermuscular bone samples of  
49  
50 484 *M. amblycephala* using RNAisoPlus Reagent (TaKaRa, China) according to the manufacturer's  
51  
52 485 protocol. The integrity and purity of the RNA was determined by gel electrophoresis and Agilent  
53  
54 486 2100 BioAnalyzer (Agilent, USA) before preparing the libraries for sequencing. Paired-end RNA  
55  
56 487 sequencing was performed using the Illumina HiSeq 2000 platform. Low quality score reads were  
57  
58 488 filtered and the clean data were aligned to the reference genome using Bowtie [77]. Genes and  
59  
60  
61  
62  
63  
64  
65

1  
2  
3  
4  
5  
6  
7  
8  
9  
10  
11  
12  
13  
14  
15  
16  
17  
18  
19  
20  
21  
22  
23  
24  
25  
26  
27  
28  
29  
30  
31  
32  
33  
34  
35  
36  
37  
38  
39  
40  
41  
42  
43  
44  
45  
46  
47  
48  
49  
50  
51  
52  
53  
54  
55  
56  
57  
58  
59  
60  
61  
62  
63  
64  
65

489 isoforms expression level were quantified by a software package: RSEM (RNASeq by  
490 Expectation Maximization) [78]. Gene expression levels were calculated by using the RPKM  
491 method (Reads per kilobase transcriptome per million mapped reads) [79] and adjusted by a  
492 scaling normalization method [80]. We detected DEGs from three stages of IBs with software  
493 NOIseq and three different tissues with PossionDis as requested. NOIseq is based on noisy  
494 distribution model, performed as described by Tarazona [81]. The parameters were set as: fold  
495 change  $\geq 2.00$  and probability  $\geq 0.7$ . PossionDis is based on the Poisson distribution, performed  
496 as described by Audic [82]. The parameters were set as: fold change  $\geq 2.00$  and FDR  $\leq 0.001$ .  
497 Annotation of DEGs were mapped to GO categories in the database  
498 (<http://www.geneontology.org/>) and the number of genes for every term were calculated to  
499 identify GO terms that were significantly enriched in the input list of DEGs. The calculated  
500 *P*-value was adjusted by the Bonferroni Correction, taking corrected *P*-value  $\leq 0.05$  as a threshold.  
501 KEGG automatic annotation was used to perform pathway enrichment analysis of DEGs.

#### 502 **Prediction of Olfactory Receptor Genes**

503 Olfactory receptor genes were identified by previously described methods [83], with the exception  
504 of a first-round TBLASTN [84] search, in which 1,417 functional olfactory receptor genes from *H.*  
505 *sapiens*, *D. rerio*, *L. chalumnae*, *Lepisosteus oculatus*, *L. vexillifer*, *O. niloticus*, *O. latipes*, *F.*  
506 *rubripes* and *Xenopus tropicalis* were used as queries. We then predicted the structure of  
507 sequenced genes using the blast-hit sequence with the software GeneWise extending in both 3' and  
508 5' directions along the genome sequences. The results were further confirmed by NR annotation.  
509 Then the coding sequences from the start (ATG) to stop codons were extracted, while sequences  
510 that contained interrupting stop codons or frame-shifts were regarded as pseudogenes. To  
511 construct phylogenetic trees, the amino-acid sequences encoded by olfactory receptor genes were  
512 first aligned using the program MUSCLE nested in MEGA 5.10 [85]. We then constructed the  
513 phylogenetic tree using the neighbor-joining method with Poisson correction distances using the  
514 program MEGA 5.10. We also identified and compared the genes for five basic tastes (sour, sweet,  
515 bitter, umami and salty) using a similar method as in OR gene identification.

#### 516 **Gut Microbiota Analysis**

517 To characterize the microbial diversity of herbivorous *M. amblycephala*, a total of 12 juvenile

1  
2  
3  
4  
5  
6  
7  
8  
9  
10  
11  
12  
13  
14  
15  
16  
17  
18  
19  
20  
21  
22  
23  
24  
25  
26  
27  
28  
29  
30  
31  
32  
33  
34  
35  
36  
37  
38  
39  
40  
41  
42  
43  
44  
45  
46  
47  
48  
49  
50  
51  
52  
53  
54  
55  
56  
57  
58  
59  
60  
61  
62  
63  
64  
65

518 (LBSB), domestic adult (DBSB), wild adult *M. amblycephala* (BSB) and wild adult *C. idellus*  
519 (GC) intestinal fecal samples were collected. Bacterial genomic DNA was extracted from 200 mg  
520 gut content of each sample using a QIAamp DNA Stool Mini Kit (Qiagen, Valencia, USA).  
521 Quality and integrity of each DNA sample were determined by 1% agarose gel electrophoresis in  
522 Tris-acetate-EDTA (TAE) buffer. DNA concentration was quantified using NanoDrop ND-2000  
523 spectrophotometer (Thermo Scientific). To determine the diversity and composition of the  
524 bacterial communities of each sample, a total of 20 µg of genomic DNA were sequenced using the  
525 Illumina MiSeq sequencing platform. PCR amplifications were conducted from each sample to  
526 produce the V4 hypervariable region (515F and 806 R) of the 16S rRNA gene according to the  
527 previously described method [86]. We used the UPARSE pipeline [87] to pick operational  
528 taxonomic units (OTUs) at an identity threshold of 97% and picked representative sequences for  
529 each OTU and used the RDP classifier to assign taxonomic data to each representative sequence.

### 530 **Additional files**

531 Additional file 1: Tables S1 to S17 and Figures S1 to S28.

532 Additional file 2: Data Note1 Expanded genes in the *M. amblycephala* and *C. idellus* lineage.

533 Additional file 3: Data Note2 Positively selected genes in the *M. amblycephala* and *C. idellus*  
534 genomes.

### 535 **Abbreviations**

536 IB, intermuscular bone; SNP, single-nucleotide polymorphism; BUSCO, benchmarking universal  
537 single-copy orthologs; TE, transposable element; LTR, long terminal repeat retrotransposon; LG,  
538 linkage group; PSG, positively selected gene; ECM, extracellular matrix; dpf, days post  
539 fertilization; BMP, bone morphogenetic protein; FGF, fibroblast growth factor; OR, olfactory  
540 receptor; OTU, operational taxonomic unit; DEGs, differentially expressed genes; HE,  
541 hematoxylin and eosin; SEM, scanning electron microscopy; TEM, transmission electron  
542 microscopy

### 543 **Acknowledgements**

544 This work was supported by the Fundament Research Funds for the Central Universities  
545 (2662015PY019), the Modern Agriculture Industry Technology System Construction Projects of

1  
2  
3  
4  
5  
6  
7  
8  
9  
10  
11  
12  
13  
14  
15  
16  
17  
18  
19  
20  
21  
22  
23  
24  
25  
26  
27  
28  
29  
30  
31  
32  
33  
34  
35  
36  
37  
38  
39  
40  
41  
42  
43  
44  
45  
46  
47  
48  
49  
50  
51  
52  
53  
54  
55  
56  
57  
58  
59  
60  
61  
62  
63  
64  
65

546 China titled as—Staple Freshwater Fishes Industry Technology System (No. CARS-46-05),  
547 Guangdong Haid Group Co., Ltd and the International Scientific and Technology Cooperation  
548 Program of Wuhan City (2015030809020365).

### 549 **Availability of data and materials**

550 Datasets supporting the results of this article are available in the GigaDB repository associated  
551 with this publication [88]. Raw whole genome sequencing, transcriptome and RAD-Seq data have  
552 been deposited at NCBI in the SRA under BioProject number PRJNA343584.

### 553 **Authors' contributions**

554 W.W. initiated and conceived the project and provided scientific input. X.Q. organized financial  
555 support and designed the project. M.S. discussed the data, wrote and modified the paper. H.L. and  
556 C.C. conducted the biological experiments, analyzed the data and wrote the paper with input from  
557 other authors. I.E. wrote and modified the manuscript and discussed the data. The RAD-Seq data  
558 analyses and the genetic map construction were performed by Z.G., Y.G., J.J. and X.J. Genome  
559 assembly and annotation were performed by J.M., H.C., M.X. and J.C. X.Z., W.L., R.L., B.C.,  
560 J.W., H.L., S.Y., H.W., X.C., X.Z., Y.Z., K.W., R.Y. and B. L. carried out the samples preparation  
561 and data collection. J.L. and J.C. identified the gene families and analyzed the RNA-seq data. M.B.  
562 coordinated the project. S.Z. and X.F. modified the manuscript and discussed the data. All authors  
563 read the manuscript and provided comments and suggestions for improvements. The authors  
564 declare no competing financial interests.

### 565 **Competing interests**

566 The authors declare that they have no competing interests.

### 567 **Ethics approval and consent to participate**

568 All experimental procedures involving fish were performed in accordance with the guidelines and  
569 regulations of the National Institute of Health Guide for the Care and Use of Laboratory Animals  
570 and the Institutional Review Board on Bioethics and Biosafety of BGI (BGI-IRB).

### 571 **References**

- 1  
2  
3  
4  
5  
6  
7  
8  
9  
10  
11  
12  
13  
14  
15  
16  
17  
18  
19  
20  
21  
22  
23  
24  
25  
26  
27  
28  
29  
30  
31  
32  
33  
34  
35  
36  
37  
38  
39  
40  
41  
42  
43  
44  
45  
46  
47  
48  
49  
50  
51  
52  
53  
54  
55  
56  
57  
58  
59  
60  
61  
62  
63  
64  
65
- 572 1. FAO Fisheries and Aquaculture Department. FAO yearbook Fishery and Aquaculture Statistics  
573 2014 (Food and Agriculture Organization of the United Nations, Rome, 2016).
  - 574 2. Star B, Nederbragt AJ, Jentoft S, Grimholt U, Malmstrøm M, Gregers TF, et al. The genome  
575 sequence of Atlantic cod reveals a unique immune system. *Nature*. 2011; 477:207–10.
  - 576 3. Berthelot C, Brunet F, Chalopin D, Juanchich A, Bernard M, Noël B, et al. The rainbow trout  
577 genome provides novel insights into evolution after whole-genome duplication in vertebrates.  
578 *Nat. Commun.* 2014; 5:3657.
  - 579 4. Tine M., Kuhl H., Gagnaire PA, Louro B, Desmarais E, Martins RS, et al. European sea bass  
580 genome and its variation provide insights into adaptation to euryhalinity and speciation. *Nat.*  
581 *Commun.* 2014; 5:5770.
  - 582 5. Wu C, Zhang D, Kan M, Lv Z, Zhu A, Su Y, et al. The draft genome of the large yellow  
583 croaker reveals well-developed innate immunity. *Nat. Commun.* 2014; 5:5227.
  - 584 6. Chen S, Zhang G, Shao C, Huang Q, Liu G, Zhang P, et al. Whole-genome sequence of a  
585 flatfish provides insights into ZW sex chromosome evolution and adaptation to a benthic  
586 lifestyle. *Nat. Genet.* 2014; 46:253–60.
  - 587 7. Brawand D, Wagner CE, Li YI, Malinsky M, Keller I, Fan S, et al. The genomic substrate for  
588 adaptive radiation in African cichlid fish. *Nature*. 2014; 513:375–82.
  - 589 8. Chen X, Zhong L, Bian C, Xu P, Qiu Y, You X, et al. High-quality genome assembly of  
590 channel catfish, *Ictalurus punctatus*. *GigaScience*. 2016; 5:39.
  - 591 9. Gemballa S, Britz R. Homology of intermuscular bones in acanthomorph fishes. *Am. Mus.*  
592 *Novit.* 1998; 3241:1–25.
  - 593 10. Danos N, Ward AB. The homology and origins of intermuscular bones in fishes: Phylogenetic  
594 or biomechanical determinants? *Biol. J. Linn. Soc.* 2012; 106:607–22.
  - 595 11. Wan SM, Yi SK, Zhong J, Nie CH, Guan NN, Zhang WZ, et al. Dynamic mRNA and miRNA  
596 expression analysis in response to intermuscular bone development of blunt snout bream  
597 (*Megalobrama amblycephala*). *Sci. Rep.* 2016; 6:31050.
  - 598 12. Xu P, Zhang X, Wang X, Li J, Liu G, Kuang Y, et al. Genome sequence and genetic diversity  
599 of the common carp, *Cyprinus carpio*. *Nat. Genet.* 2014; 46:1212–9.
  - 600 13. Wang Y, Lu Y, Zhang Y, Ning Z, Li Y, Zhao Q, et al. The draft genome of the grass carp  
601 (*Ctenopharyngodon idellus*) provides insights into its evolution and vegetarian adaptation.  
602 *Nat. Genet.* 2015; 47:625–31.
  - 603 14. Gao Z, Luo W, Liu H, Zeng C, Liu X, Yi S, et al. Transcriptome analysis and SSR/SNP  
604 markers information of the blunt snout bream (*Megalobrama amblycephala*). *PLoS One.*  
605 2012; 7:e42637.

- 606 15. Yi S, Gao ZX, Zhao H, Zeng C, Luo W, Chen B, et al. Identification and characterization of  
607 microRNAs involved in growth of blunt snout bream (*Megalobrama amblycephala*) by  
608 Solexa sequencing. BMC Genomics. 2013; 14:754.
- 609 16. Luo R, Liu B, Xie Y, Li Z, Huang W, Yuan J, et al. SOAPdenovo2: an empirically improved  
610 memory-efficient short-read de novo assembler. Gigascience. 2012;1:18.
- 611 17. Simao FA, Waterhouse RM, Ioannidis P, Kriventseva EV, Zdobnov EM. BUSCO: assessing  
612 genome assembly and annotation completeness with single-copy orthologs. Bioinformatics.  
613 2015;31:3210–2.
- 614 18. Jones FC, Grabherr MG, Chan YF, Russell P, Mauceli E, Johnson J, et al. The genomic basis  
615 of adaptive evolution in threespine sticklebacks. Nature. 2012; 484:55–61.
- 616 19. Niimura Y. On the origin and evolution of vertebrate olfactory receptor genes: comparative  
617 genome analysis among 23 chordate species. Genome Biol. Evol. 2009; 1:34–44.
- 618 20. Lindemann B. Receptors and transduction in taste. Nature. 2001; 413:219–25.
- 619 21. Nei M, Niimura Y, Nozawa M. The evolution of animal chemosensory receptor gene  
620 repertoires: roles of chance and necessity. Nat. Rev. Genet. 2008; 9:951–63.
- 621 22. Chandrashekar J, Mueller KL, Hoon MA, Adler E, Feng L, Guo W, et al. T2Rs function as  
622 bitter taste receptors. Cell. 2000; 100:703–11.
- 623 23. Niimura Y, Nei M. Evolutionary dynamics of olfactory and other chemosensory receptor  
624 genes in vertebrates. J. Hum. Genet. 2006; 51:505–17.
- 625 24. Nelson G, Chandrashekar J, Hoon MA, Feng L, Zhao G, Ryba NJ, et al. An amino-acid taste  
626 receptor. Nature. 2002; 416:199–202.
- 627 25. Li R, Fan W, Tian G, Zhu H, He L, Cai J, et al. The sequence and *de novo* assembly of the  
628 giant panda genome. Nature. 2010; 463:311–7.
- 629 26. Ferreira AHP, Marana SR, Terra WR, Ferreira C. Purification, molecular cloning, and  
630 properties of a  $\beta$ -glycosidase isolated from midgut lumen of *Tenebrio molitor* (Coleoptera)  
631 larvae. Insect Biochem. Mol. Biol. 2001; 31:1065–76.
- 632 27. Tokuda G, Saito H, Watanabe H. A digestive  $\beta$ -glucosidase from the salivary glands of the  
633 termite, *Neotermes koshunensis* (Shiraki): Distribution, characterization and isolation of its  
634 precursor cDNA by 5'- and 3'-RACE amplifications with degenerate primers. Insect  
635 Biochem. Mol. Biol. 2002; 32:1681–9.
- 636 28. Sakamoto K, Uji S, Kurokawa T, Toyohara H. Molecular cloning of endogenous  
637  $\beta$ -glucosidase from common Japanese brackish water clam *Corbicula japonica*. Gene. 2009;  
638 435:72–9.
- 639 29. Zhu L, Wu Q, Dai J, Zhang S, Wei F. Evidence of cellulose metabolism by the giant panda gut



- 640 microbiome. Proc. Natl. Acad. Sci. USA. 2011; 108:17714–9.
- 641 30. Bird NC, Mabee PM. Developmental morphology of the axial skeleton of the zebrafish, *Danio*  
642 *rerio* (Ostariophysi: Cyprinidae). Dev. Dyn. 2003; 228:337–57.
- 643 31. Ornitz D, Marie P. FGF signaling pathways in endochondral and intramembranous bone  
644 development and human genetic disease. Genes Dev. 2002; 16:1446–65.
- 645 32. Ortega N, Behonick DJ, Werb Z. Matrix remodeling during endochondral ossification. Trends  
646 Cell Biol. 2004; 14:86–93.
- 647 33. Even-Ram S, Doyle AD, Conti MA, Matsumoto K, Adelstein RS, Yamada KM. Myosin IIA  
648 regulates cell motility and actomyosin-microtubule crosstalk. Nat. Cell Biol. 2007;  
649 9:299–309.
- 650 34. Sheetz MP, Felsenfeld DP, Galbraith CG. Cell migration: Regulation of force on  
651 extracellular-complexes. Trends Cell Biol. 1998; 8:51–4.
- 652 35. Gunst SJ, Zhang W. Actin cytoskeletal dynamics in smooth muscle: a new paradigm for the  
653 regulation of smooth muscle contraction. Am. J. Physiol. Cell Physiol. 2008; 295:C576–87.
- 654 36. Webb RC. Smooth muscle contraction and relaxation. Adv. Physiol. Educ. 2003; 27:201–6.
- 655 37. Ulrich TA, De Juan Pardo EM, Kumar S. The mechanical rigidity of the extracellular matrix  
656 regulates the structure, motility, and proliferation of glioma cells. Cancer Res. 2009;  
657 69:4167–74.
- 658 38. Ridley AJ. Rho GTPases and cell migration. J. Cell Sci. 2001; 114:2713–22.
- 659 39. Etienne-Manneville S, Hall A. Rho GTPases in Cell Biology. Nature. 2002; 420:629–35.
- 660 40. Ridley AJ. Cell Migration: Integrating Signals from Front to Back. Science. 2003;  
661 302:1704–9.
- 662 41. Chen G, Deng C, Li YP. TGF- $\beta$  and BMP signaling in osteoblast differentiation and bone  
663 formation. Int. J. Biol. Sci. 2012; 8:272–88.
- 664 42. Harada S, Rodan GA. Control of osteoblast function and regulation of bone mass. Nature.  
665 2003; 423:349–55.
- 666 43. Long F. Building strong bones: molecular regulation of the osteoblast lineage. Nat. Rev. Mol.  
667 Cell Biol. 2011; 13:27–38.
- 668 44. Boyle WJ, Simonet WS, Lacey DL. Osteoclast differentiation and activation. Nature. 2003;  
669 423:337–42.
- 670 45. Fakhry A, Ratisoontorn C, Vedhachalam C, Salhab I, Koyama E, Leboy P, et al. Effects of  
671 FGF-2/-9 in calvarial bone cell cultures: Differentiation stage-dependent mitogenic effect,  
672 inverse regulation of BMP-2 and noggin, and enhancement of osteogenic potential. Bone.

673 2005; 36:254–66.

674 46. Sato K, Suematsu A, Nakashima T, Takemoto-Kimura S, Aoki K, Morishita Y, et al.  
675 Regulation of osteoclast differentiation and function by the CaMK-CREB pathway. *Nat. Med.*  
676 2006; 12:1410–6.

677 47. Li H, Durbin R. Fast and accurate short read alignment with Burrows-Wheeler transform.  
678 *Bioinformatics.* 2009; 25:1754–60.

679 48. Grabherr MG, Haas BJ, Yassour M, Levin JZ, Thompson DA, Amit I, et al. Trinity:  
680 reconstructing a full-length transcriptome without a genome from RNA-Seq data . *Nat.*  
681 *Biotechnol.* 2011; 29:644–52.

682 49. Benson G. Tandem repeats finder: A program to analyze DNA sequences. *Nucleic Acids Res.*  
683 1999; 27:573–80.

684 50. Jurka J, Kapitonov VV, Pavlicek A, Klonowski P, Kohany O, Walichiewicz J. Repbase  
685 Update, a database of eukaryotic repetitive elements. *Cytogenet. Genome Res.* 2005;  
686 110:462–7.

687 51. Griffiths-Jones S, Moxon S, Marshall M, Khanna A, Eddy SR, Bateman A. Rfam: Annotating  
688 non-coding RNAs in complete genomes. *Nucleic Acids Res.* 2005; 33:121–4.

689 52. Birney E, Clamp M, Durbin R. GeneWise and Genomewise. *Genome Res.* 2004; 14:988–95.

690 53. Trapnell C, Pachter L, Salzberg SL. TopHat: Discovering splice junctions with RNA-Seq.  
691 *Bioinformatics.* 2009; 25:1105–11.

692 54. Trapnell C, Williams BA, Pertea G, Mortazavi A, Kwan G, Van Baren MJ, et al. Transcript  
693 assembly and quantification by RNA-Seq reveals unannotated transcripts and isoform  
694 switching during cell differentiation. *Nat. Biotechnol.* 2010; 28:511–5.

695 55. Elsik CG, Mackey AJ, Reese JT, Milshina NV, Roos DS, Weinstock GM. Creating a honey  
696 bee consensus gene set. *Genome Biol.* 2007; 8:R13.

697 56. Bairoch A, Apweiler R. The SWISS-PROT protein sequence database and its supplement  
698 TrEMBL in 2000. *Nucleic Acids Res.* 2000; 28:45–8.

699 57. Ashburner M, Ball CA, Blake JA, Botstein D, Butler H, Cherry JM, et al. Gene ontology: tool  
700 for the unification of biology. *Nat. Genet.* 2000; 25:25–9.

701 58. Kanehisa M, Goto S. KEGG: Kyoto encyclopedia of genes and genomes. *Nucleic Acids Res.*  
702 2000; 28:27-30.

703 59. Lowe TM, Eddy SR. tRNAscan-SE: A program for improved detection of transfer RNA genes  
704 in genomic sequence. *Nucleic Acids Res.* 1997; 25:955–64.

- 705 60. Nawrocki EP, Kolbe DL, Eddy SR. Infernal 1.0: Inference of RNA alignments. *Bioinformatics*.  
706 2009; 25:1335–7.
- 707 61. Baird NA, Etter PD, Atwood TS, Currey MC, Shiver AL, Lewis ZA, et al. Rapid SNP  
708 discovery and genetic mapping using sequenced RAD markers. *PloS One*. 2008; 3:e3376.
- 709 62. Li R, Li Y, Fang X, Yang H, Wang J, Kristiansen K, et al. SNP detection for massively  
710 parallel whole-genome resequencing. *Genome Res*. 2009; 19:1124–32.
- 711 63. Li R, Yu C, Li Y, Lam TW, Yiu SM, Kristiansen K, et al. SOAP2: An improved ultrafast tool  
712 for short read alignment. *Bioinformatics*. 2009; 25:1966–7.
- 713 64. Grattapaglia D, Sederoff R. Genetic linkage maps of *Eucalyptus grandis* and *Eucalyptus*  
714 *urophylla* using a pseudo-testcross: Mapping strategy and RAPD markers. *Genetics*. 1994;  
715 137:1121–37.
- 716 65. Li H, Coghlan A, Ruan J, Coin LJ, Heriche JK, Osmotherly L, et al. TreeFam: a curated  
717 database of phylogenetic trees of animal gene families. *Nucleic Acids Res*. 2006;  
718 34:D572–80.
- 719 66. Edgar RC. MUSCLE: Multiple sequence alignment with high accuracy and high throughput.  
720 *Nucleic Acids Res*. 2004; 32:1792–7.
- 721 67. Guindon S, Dufayard JF, Lefort V, Anisimova M, Hordijk W, Gascuel O. New algorithms and  
722 methods to estimate maximum-likelihood phylogenies: Assessing the performance of PhyML  
723 3.0. *Syst. Biol*. 2010; 59:307–21.
- 724 68. Guindon S, Gascuel O. A simple, fast, and accurate algorithm to estimate large phylogenies by  
725 maximum likelihood. *Syst. Biol*. 2003; 52:696–704.
- 726 69. Yang Z. PAML 4: Phylogenetic analysis by maximum likelihood. *Mol. Biol. Evol*. 2007;  
727 24:1586–91.
- 728 70. Yang Z, Rannala B. Bayesian estimation of species divergence times under a molecular clock  
729 using multiple fossil calibrations with soft bounds. *Mol. Biol. Evol*. 2006; 23:212–26.
- 730 71. Hahn MW, Demuth JP, Han SG. Accelerated rate of gene gain and loss in primates. *Genetics*.  
731 2007; 177:1941–9.
- 732 72. Löytynoja A, Goldman N. An algorithm for progressive multiple alignment of sequences with  
733 insertions. *Proc. Natl. Acad. Sci. USA*. 2005; 102:10557–62.
- 734 73. Talavera G, Castresana J. Improvement of phylogenies after removing divergent and  
735 ambiguously aligned blocks from protein sequence alignments. *Syst. Biol*. 2007; 56:564–77.
- 736 74. Dawson AB. A note on the staining of the skeleton of cleared specimens with alizarin red S.  
737 *Biotech. Histochem*. 1926; 1:123-4.

- 738 75. Gruber HE. Adaptations of Goldner's Masson trichrome stain for the study of undecalcified  
739 plastic embedded bone. *Biotech. Histochem.* 1992; 67:30–4.
- 740 76. Ott HC, Matthiesen TS, Goh SK, Black LD, Kren SM, Netoff TI, et al.  
741 Perfusion-decellularized matrix: using nature's platform to engineer a bioartificial heart. *Nat.*  
742 *Med.* 2008; 14:213–21.
- 743 77. Langmead B, Salzberg SL. Fast gapped-read alignment with Bowtie 2. *Nat. Methods.* 2012;  
744 9:357–9.
- 745 78. Li B, Dewey CN. RSEM: accurate transcript quantification from RNA-Seq data with or  
746 without a reference genome. *BMC Bioinformatics.* 2011; 12:323.
- 747 79. Mortazavi A, Williams BA, McCue K, Schaeffer L, Wold B. Mapping and quantifying  
748 mammalian transcriptomes by RNA-Seq. *Nat. Methods.* 2008; 5:621–8.
- 749 80. Robinson MD, Oshlack A. A scaling normalization method for differential expression analysis  
750 of RNA-seq data. *Genome Biol.* 2010; 11:R25.
- 751 81. Tarazona S, García-Alcalde F, Dopazo J, Ferrer A, Conesa A. Differential expression in  
752 RNA-seq: a matter of depth. *Genome Res.* 2011; 21:2213–23.
- 753 82. Audic S, Claverie JM. The significance of digital gene expression profiles. *Genome Res.* 1997;  
754 7:986–95.
- 755 83. Niimura Y. Evolutionary dynamics of olfactory receptor genes in chordates: interaction  
756 between environments and genomic contents. *Hum. Genomics.* 2009; 4:107–18.
- 757 84. Altschul S, Madden T, Schaffer A, Zhang J, Zhang Z, Miller W, et al. Gapped BLAST and  
758 PSI-BLAST: a new generation of protein database search programs. *Nucleic Acids Res.* 1997;  
759 25:3389–402.
- 760 85. Kumar S, Nei M, Dudley J, Tamura K. MEGA: A biologist-centric software for evolutionary  
761 analysis of DNA and protein sequences. *Brief. Bioinform.* 2008; 9:299–306.
- 762 86. Caporaso JG, Lauber CL, Walters WA, Berg-Lyons D, Lozupone CA, Turnbaugh PJ, et al.  
763 Global patterns of 16S rRNA diversity at a depth of millions of sequences per sample. *Proc.*  
764 *Natl. Acad. Sci. USA.* 2011; 108:4516–22.
- 765 87. Edgar, RC. UPARSE: highly accurate OTU sequences from microbial amplicon reads. *Nat.*  
766 *Methods.* 2013; 10:996–8.
- 767 88. Liu H, Chen CH, Gao ZX, Min JM, Gu YM, Jian JB, et al. The draft genome of *Megalobrama*  
768 *amblycephala* reveals the development of intermuscular bone and adaptation to herbivorous  
769 diet. 2016. GigaScience Database.

1  
2  
3  
4  
5  
6  
7  
8  
9  
10  
11  
12  
13  
14  
15  
16  
17  
18  
19  
20  
21  
22  
23  
24  
25  
26  
27  
28  
29  
30  
31  
32  
33  
34  
35  
36  
37  
38  
39  
40  
41  
42  
43  
44  
45  
46  
47  
48  
49  
50  
51  
52  
53  
54  
55  
56  
57  
58  
59  
60  
61  
62  
63  
64  
65

770 **Figure Legends**

771 **Figure 1** Global view of the *M. amblycephala* genome and syntenic relationship between *C.*  
772 *idellus*, *M. amblycephala* and *D. rerio*. (A) Global view of the *M. amblycephala* genome. From  
773 outside to inside, the genetic linkage map (a); Anchors between the genetic markers and the  
774 assembled scaffolds (b); Assembled chromosomes (c); GC content within a 50-kb sliding window  
775 (d); Repeat content within a 500-kb sliding window (e); Gene distribution on each chromosome (f);  
776 Different gene expression of three transcriptomes (g). (B) Syntenic relationship between *C. idellus*  
777 (a), *M. amblycephala* (b) and *D. rerio* (c) chromosomes.

778 **Figure 2** Phylogenetic tree and comparison of orthologous genes in *M. amblycephala* and other  
779 fish species. (A) Phylogenetic tree of teleosts using 316 single copy orthologous genes. The color  
780 circles at the nodes shows the estimated divergence times using *O. latipes*–*F. rubripes*  
781 [96.9~150.9Mya], *F. rubripes*–*D. rerio* [149.85~165.2Mya], *F. rubripes*–*C. milii* [416~421.75Mya]  
782 (<http://www.timetree.org/>) as the calibration time. Pentagram represents four cyprinid fish with  
783 intermuscular bones. S, silurian period; D, devonian period; C, carboniferous period; P, permian  
784 period in Paleozoic; T, triassic period; J, jurassic and k-cretaceous period in Mesozoic; Pg,  
785 paleogene in Cenozoic Era, N, Neogene. (B) Venn diagram of shared and unique orthologous gene  
786 families in *M. amblycephala* and four other teleosts. (C) Over-represented GO annotations of  
787 cyprinid-specific expansion genes.

788 **Figure 3** Regulation of genes related to intermuscular bone formation and function identified from  
789 developmental stages and adult tissues transcriptome data. (A) Gene expression pattern involved  
790 in muscle contraction regulated genes in early developmental stages corresponds to intermuscular  
791 bone formation of *M. amblycephala*, (alizarin red staining). M, myosepta; IB, intermuscular bone.  
792 (B) Scanning electron microscope photos of muscle tissues, connective tissues, and intermuscular  
793 bone. (C) Distribution of intermuscular bone specific genes in GO annotations indicative of  
794 abundance in protein binding, calcium ion binding, GTP binding functions. (D) Several  
795 developmental signals regulating key steps of osteoblast and osteoclast differentiation in the  
796 process of intramembranous ossification. Colored boxes indicate significantly up-regulated genes  
797 in these signals specifically occurred in intermuscular bone.

798 **Figure 4** Molecular characteristics of sensory systems and the composition of gut microbiota in *M.*  
799 *amblycephala*. (A) Extensive expansion of olfactory receptor genes (ORs) in *M. amblycephala*  
800 compared with other teleosts. (B) Phylogeny of ‘beta’ type ORs in eight representative teleost  
801 species showing the significant expansion of ‘beta’ ORs in *M. amblycephala* and *C. idellus*. The  
802 pink background shows cyprinid-specific ‘beta’ types of ORs. (C) Umami, sweet and bitter tastes  
803 related gene families in teleosts with different feeding habits. (D) Structure of the umami receptor  
804 encoding T1R1 gene in cyprinid fish. (E) Relative abundance of microbial flora and taxonomic  
805 assignments in juvenile (LBSB), domestic adult (DBSB), wild adult (BSB) *M. amblycephala* and  
806 wild adult *C. idellus* (GC) samples at the phylum level.

807

808

809

810

811

812

813

814

815

816

817

818

819

820

821

822

823 **Table**

824 **Table 1 Features of the *M. amblycephala* whole genome sequence**

|    |                                            |              |
|----|--------------------------------------------|--------------|
| 4  | Total genome size (Mb)                     | 1,116        |
| 5  | N90 length of scaffold (bp)                | 20,422       |
| 6  | N50 length of scaffold (bp)                | 838,704      |
| 7  | N50 length of contig (bp)                  | 49,400       |
| 8  | Total GC content (%)                       | 37.30        |
| 9  | Protein-coding genes number                | 23,696       |
| 10 | Average gene length (bp)                   | 15,797       |
| 11 | Content of transposable elements (%)       | 34.18        |
| 12 | Number of chromosomes                      | 24           |
| 13 | Number of makers in genetic map            | 5,317        |
| 14 | Scaffolds anchored on linkage groups (LGs) | 1,434        |
| 15 | Length of scaffolds anchored on LGs (Mb)   | 779.54 (70%) |

825

1  
2  
3  
4  
5  
6  
7  
8  
9  
10  
11  
12  
13  
14  
15  
16  
17  
18  
19  
20  
21  
22  
23  
24  
25  
26  
27  
28  
29  
30  
31  
32  
33  
34  
35  
36  
37  
38  
39  
40  
41  
42  
43  
44  
45  
46  
47  
48  
49  
50  
51  
52  
53  
54  
55  
56  
57  
58  
59  
60  
61  
62  
63  
64  
65

Figure 1

**A**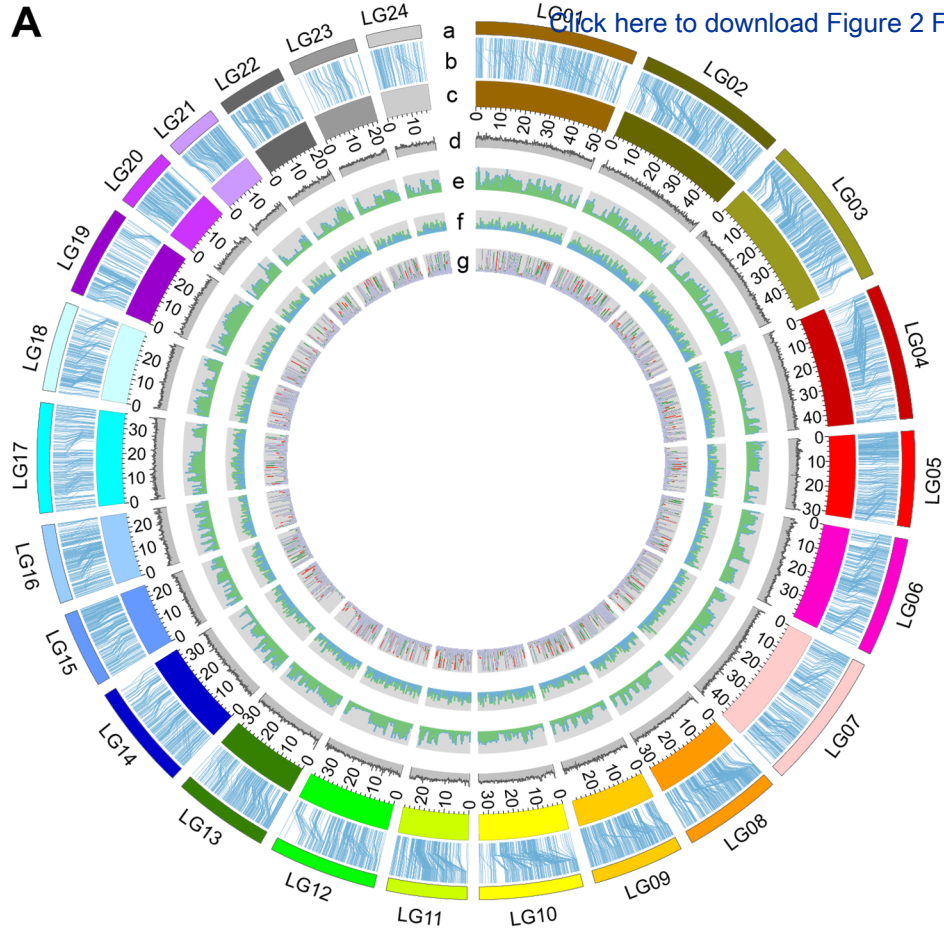**B**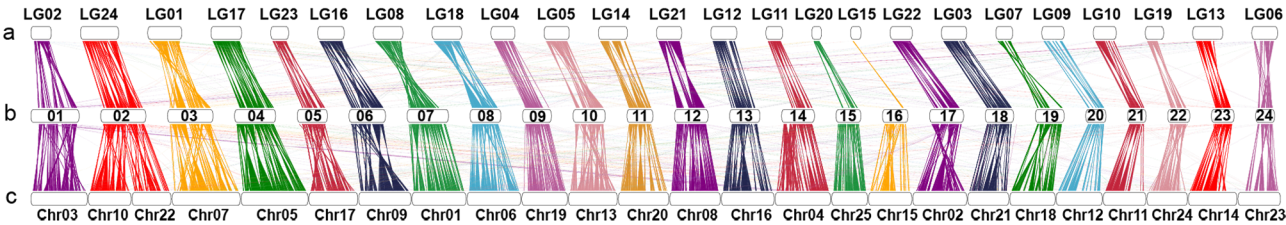



Figure2

[Click here to download Figure 2 Figure 2.pdf](#)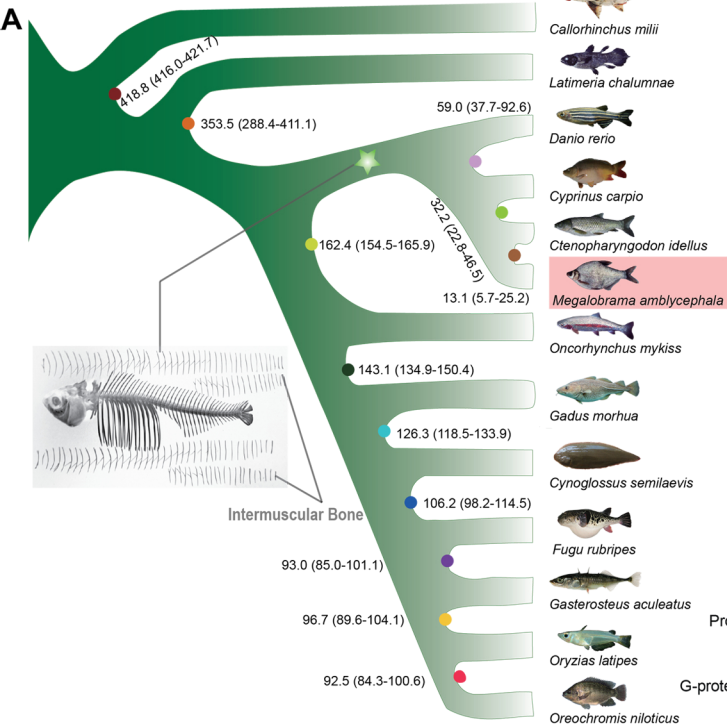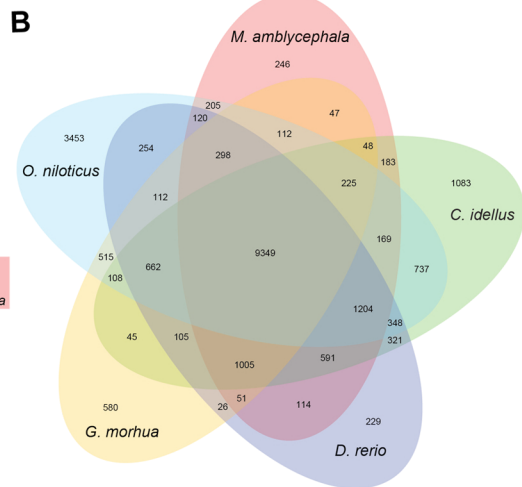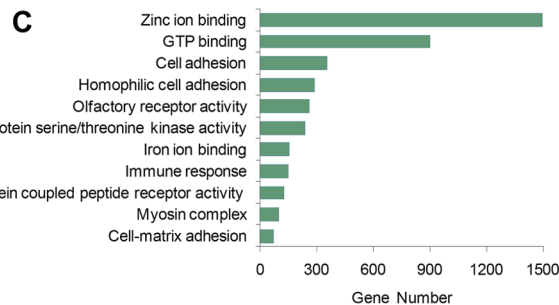



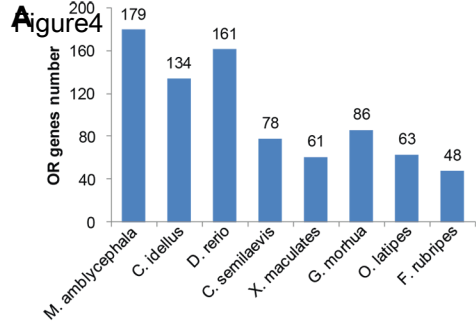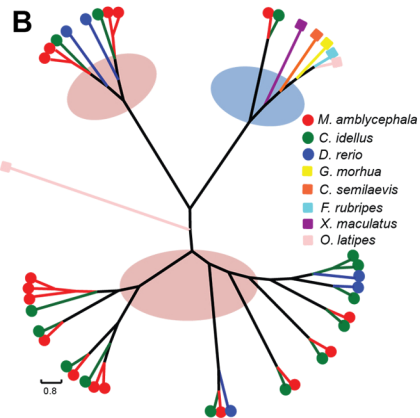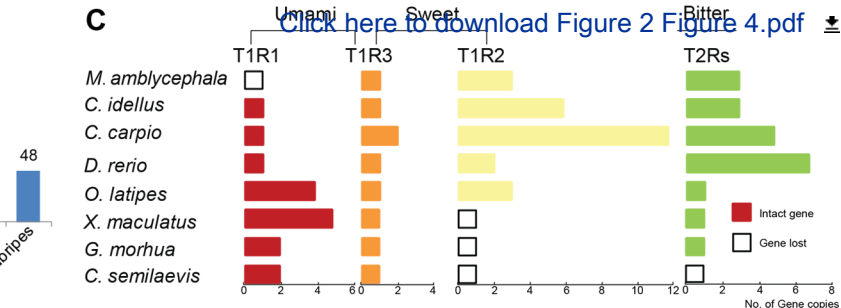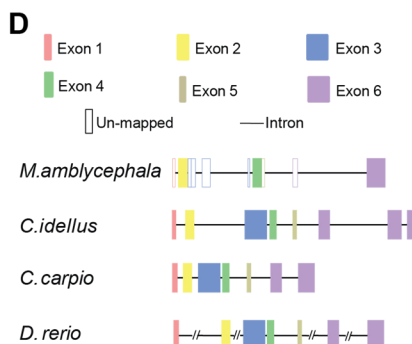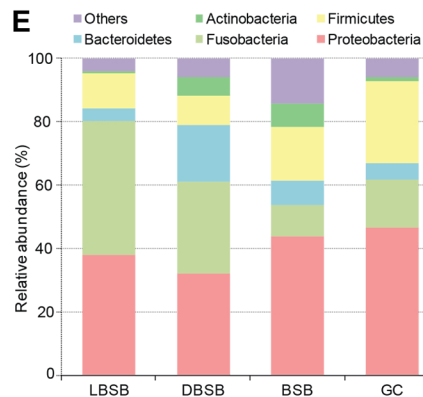



Click here to access/download

**Supplementary Material**

3 Additional file 1 Tables S1 to S17 and Figures S1 to  
S28.pdf

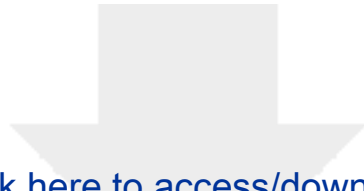

Click here to access/download  
**Supplementary Material**  
3 Additional file 2 Data note1.xlsx

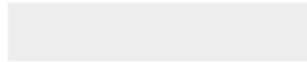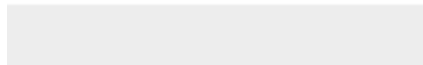



Click here to access/download  
**Supplementary Material**  
3 Additional file 3 Data note2.xlsx

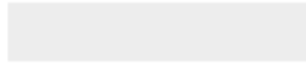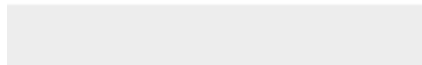

Supplement: gix039_GIGA-D-16-00088_Revision-2.pdf [file gix039_GIGA-D-16-00088_Revision-2.pdf]
